# Supplementary material
Source: PubMed Central journal article supplement (PMC6181145)

# Synthesis and Study of the Antimalarial Cardamom Peroxide

## Supporting Information

Xirui Hu,<sup>a</sup> Pharath Lim,<sup>b,c,d</sup> Rick M. Fairhurst,<sup>b</sup> and Thomas J. Maimone<sup>a\*</sup>

<sup>a</sup>Department of Chemistry, University of California–Berkeley, Berkeley, CA 94720 (USA)

<sup>b</sup>Laboratory of Malaria and Vector Research, National Institute of Allergy and Infectious Diseases, National Institutes of Health, Rockville, MD (USA)

<sup>c</sup>National Center for Parasitology, Entomology, and Malaria Control, Phnom Penh, Cambodia

<sup>d</sup>*Current address*: Medical Care Development International, Silver Spring, MD (USA)

maimone@berkeley.edu

### Table of Contents:

|                                                     |       |
|-----------------------------------------------------|-------|
| <sup>1</sup> H and <sup>13</sup> C NMR spectra..... | SI-2  |
| Mass spectra of potential PPIX-DME-1.....           | SI-29 |

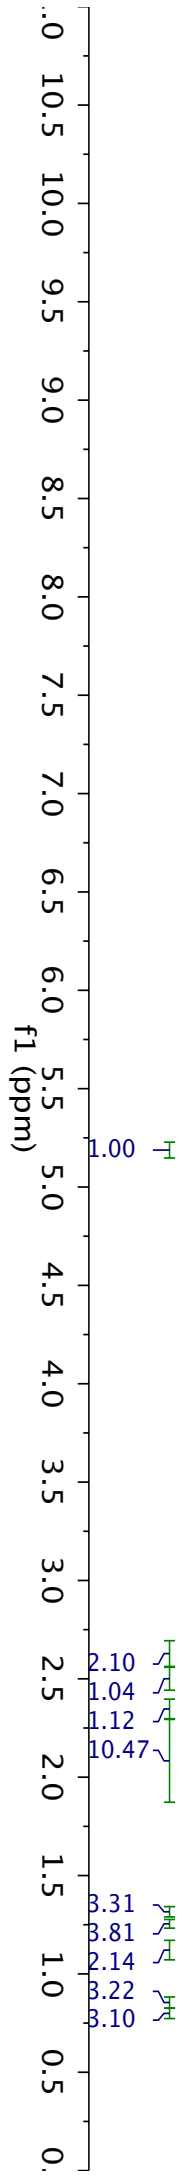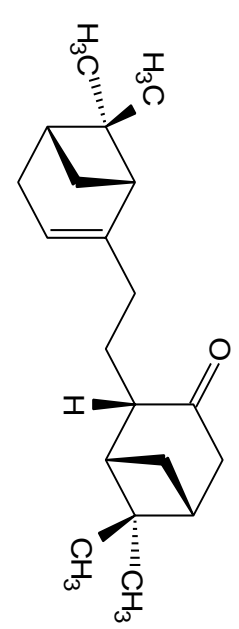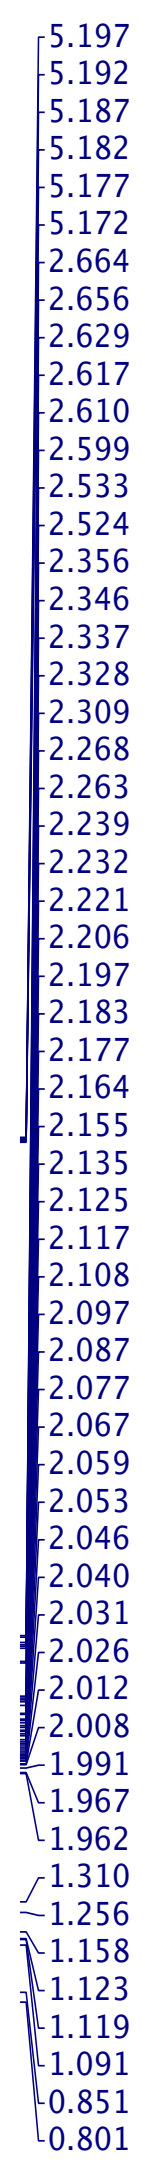

SI-2

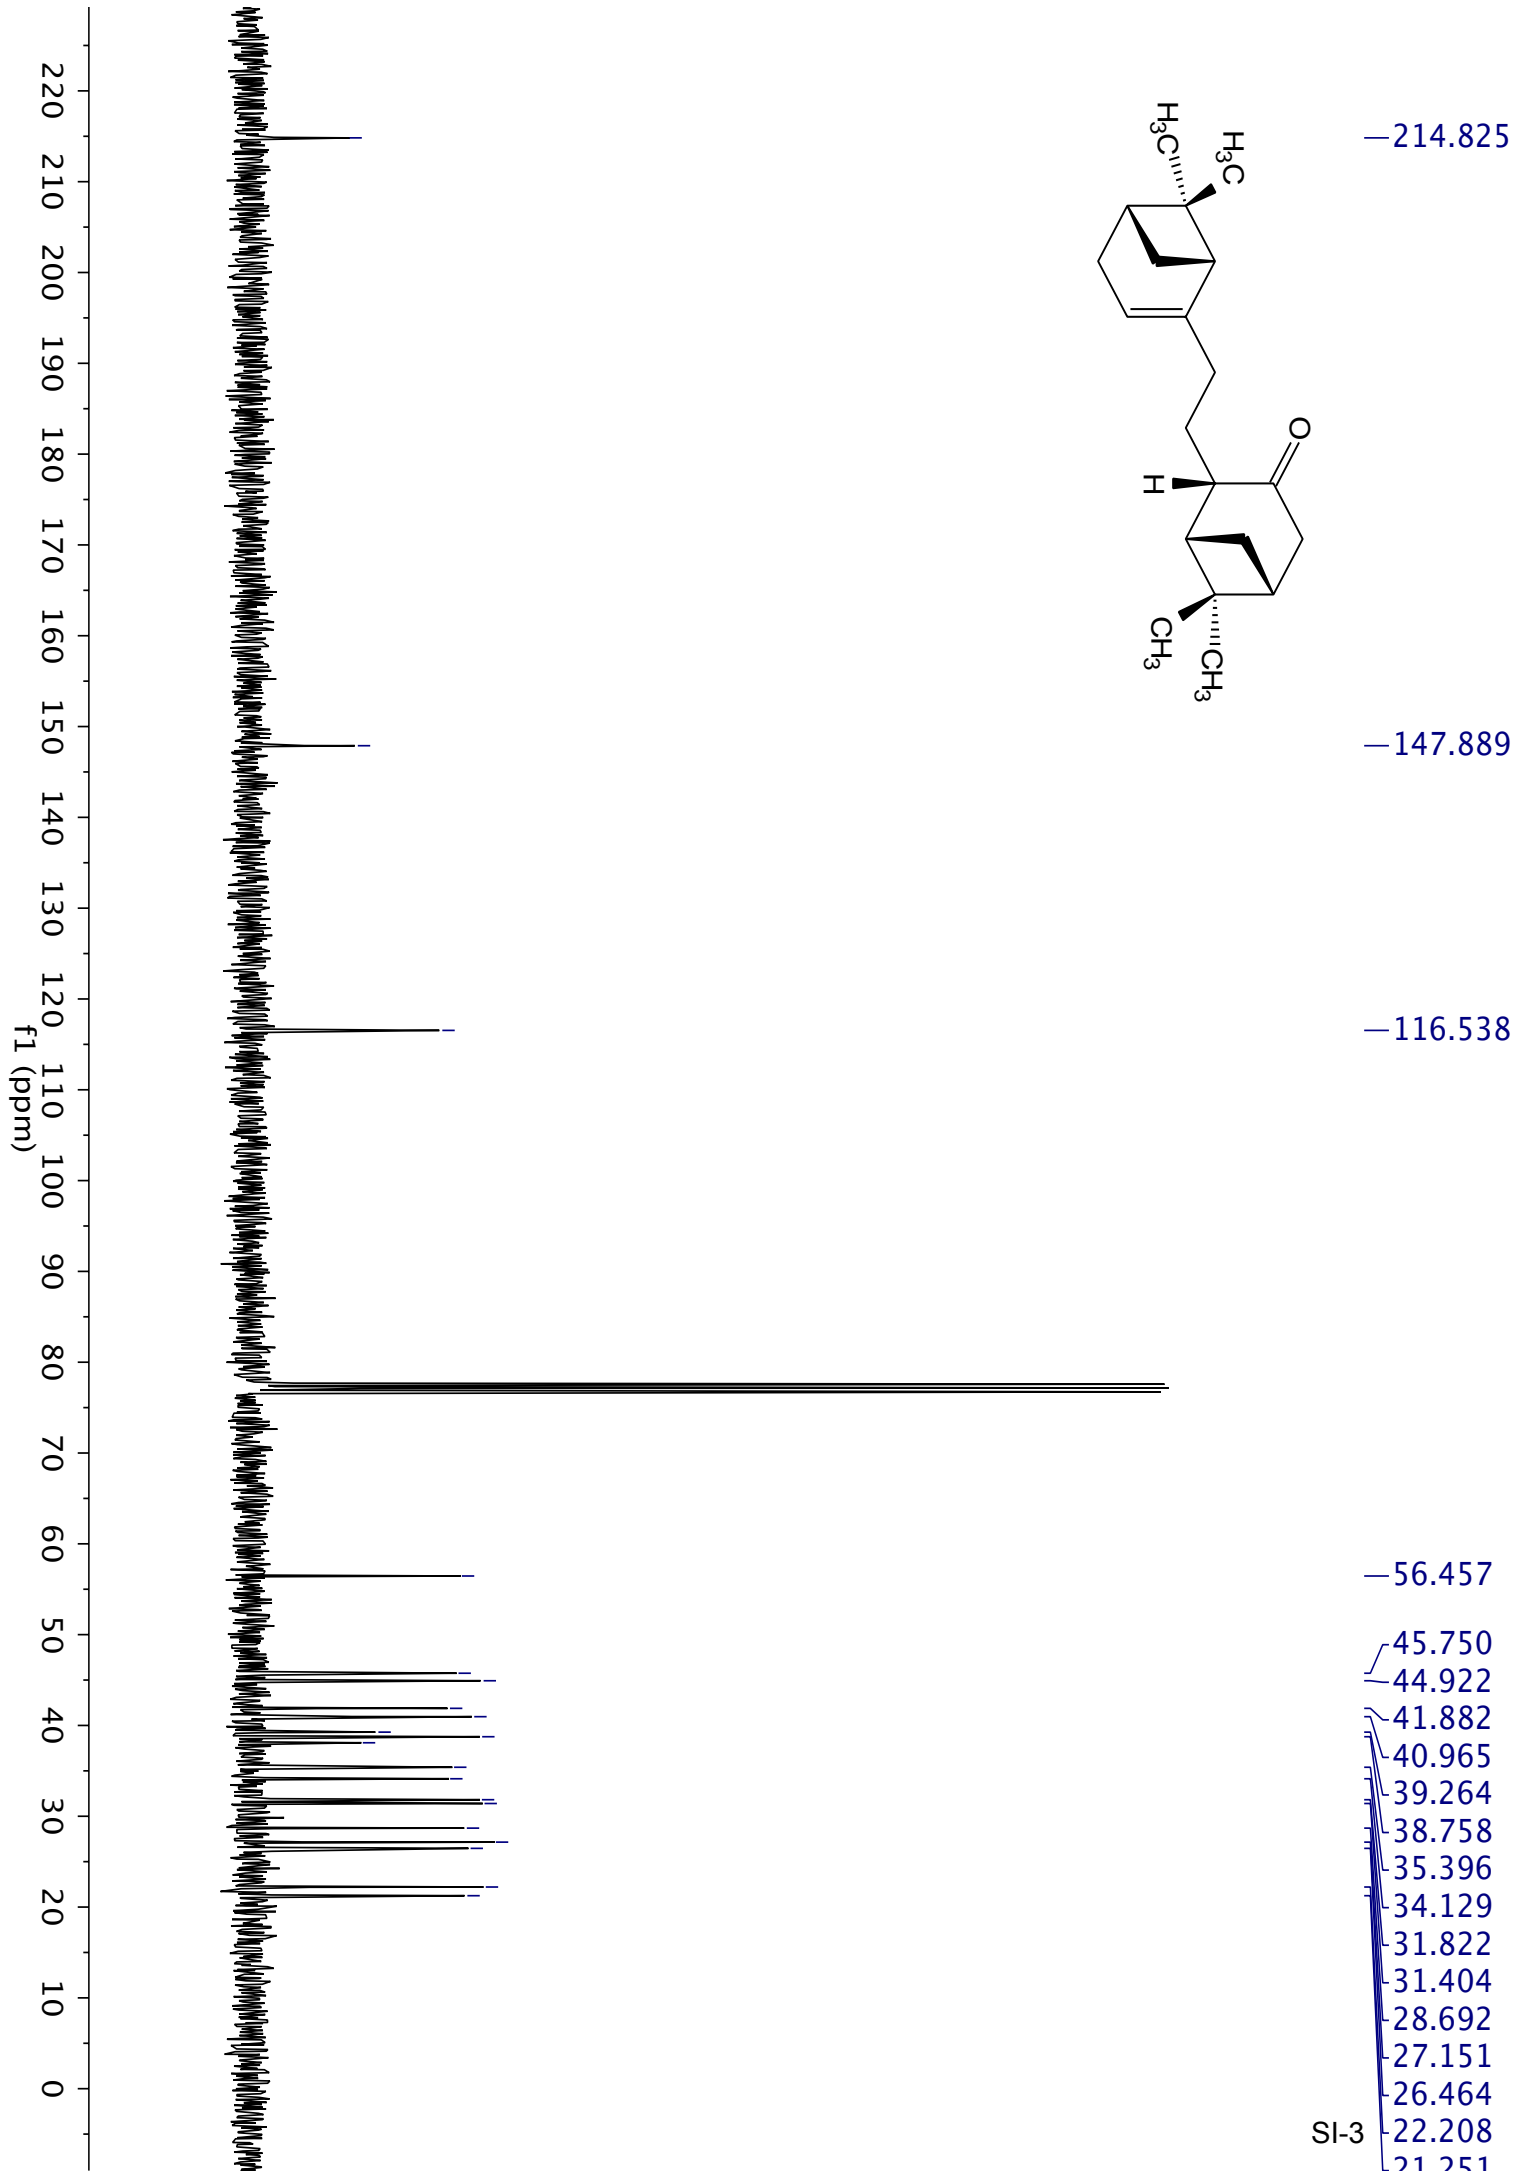

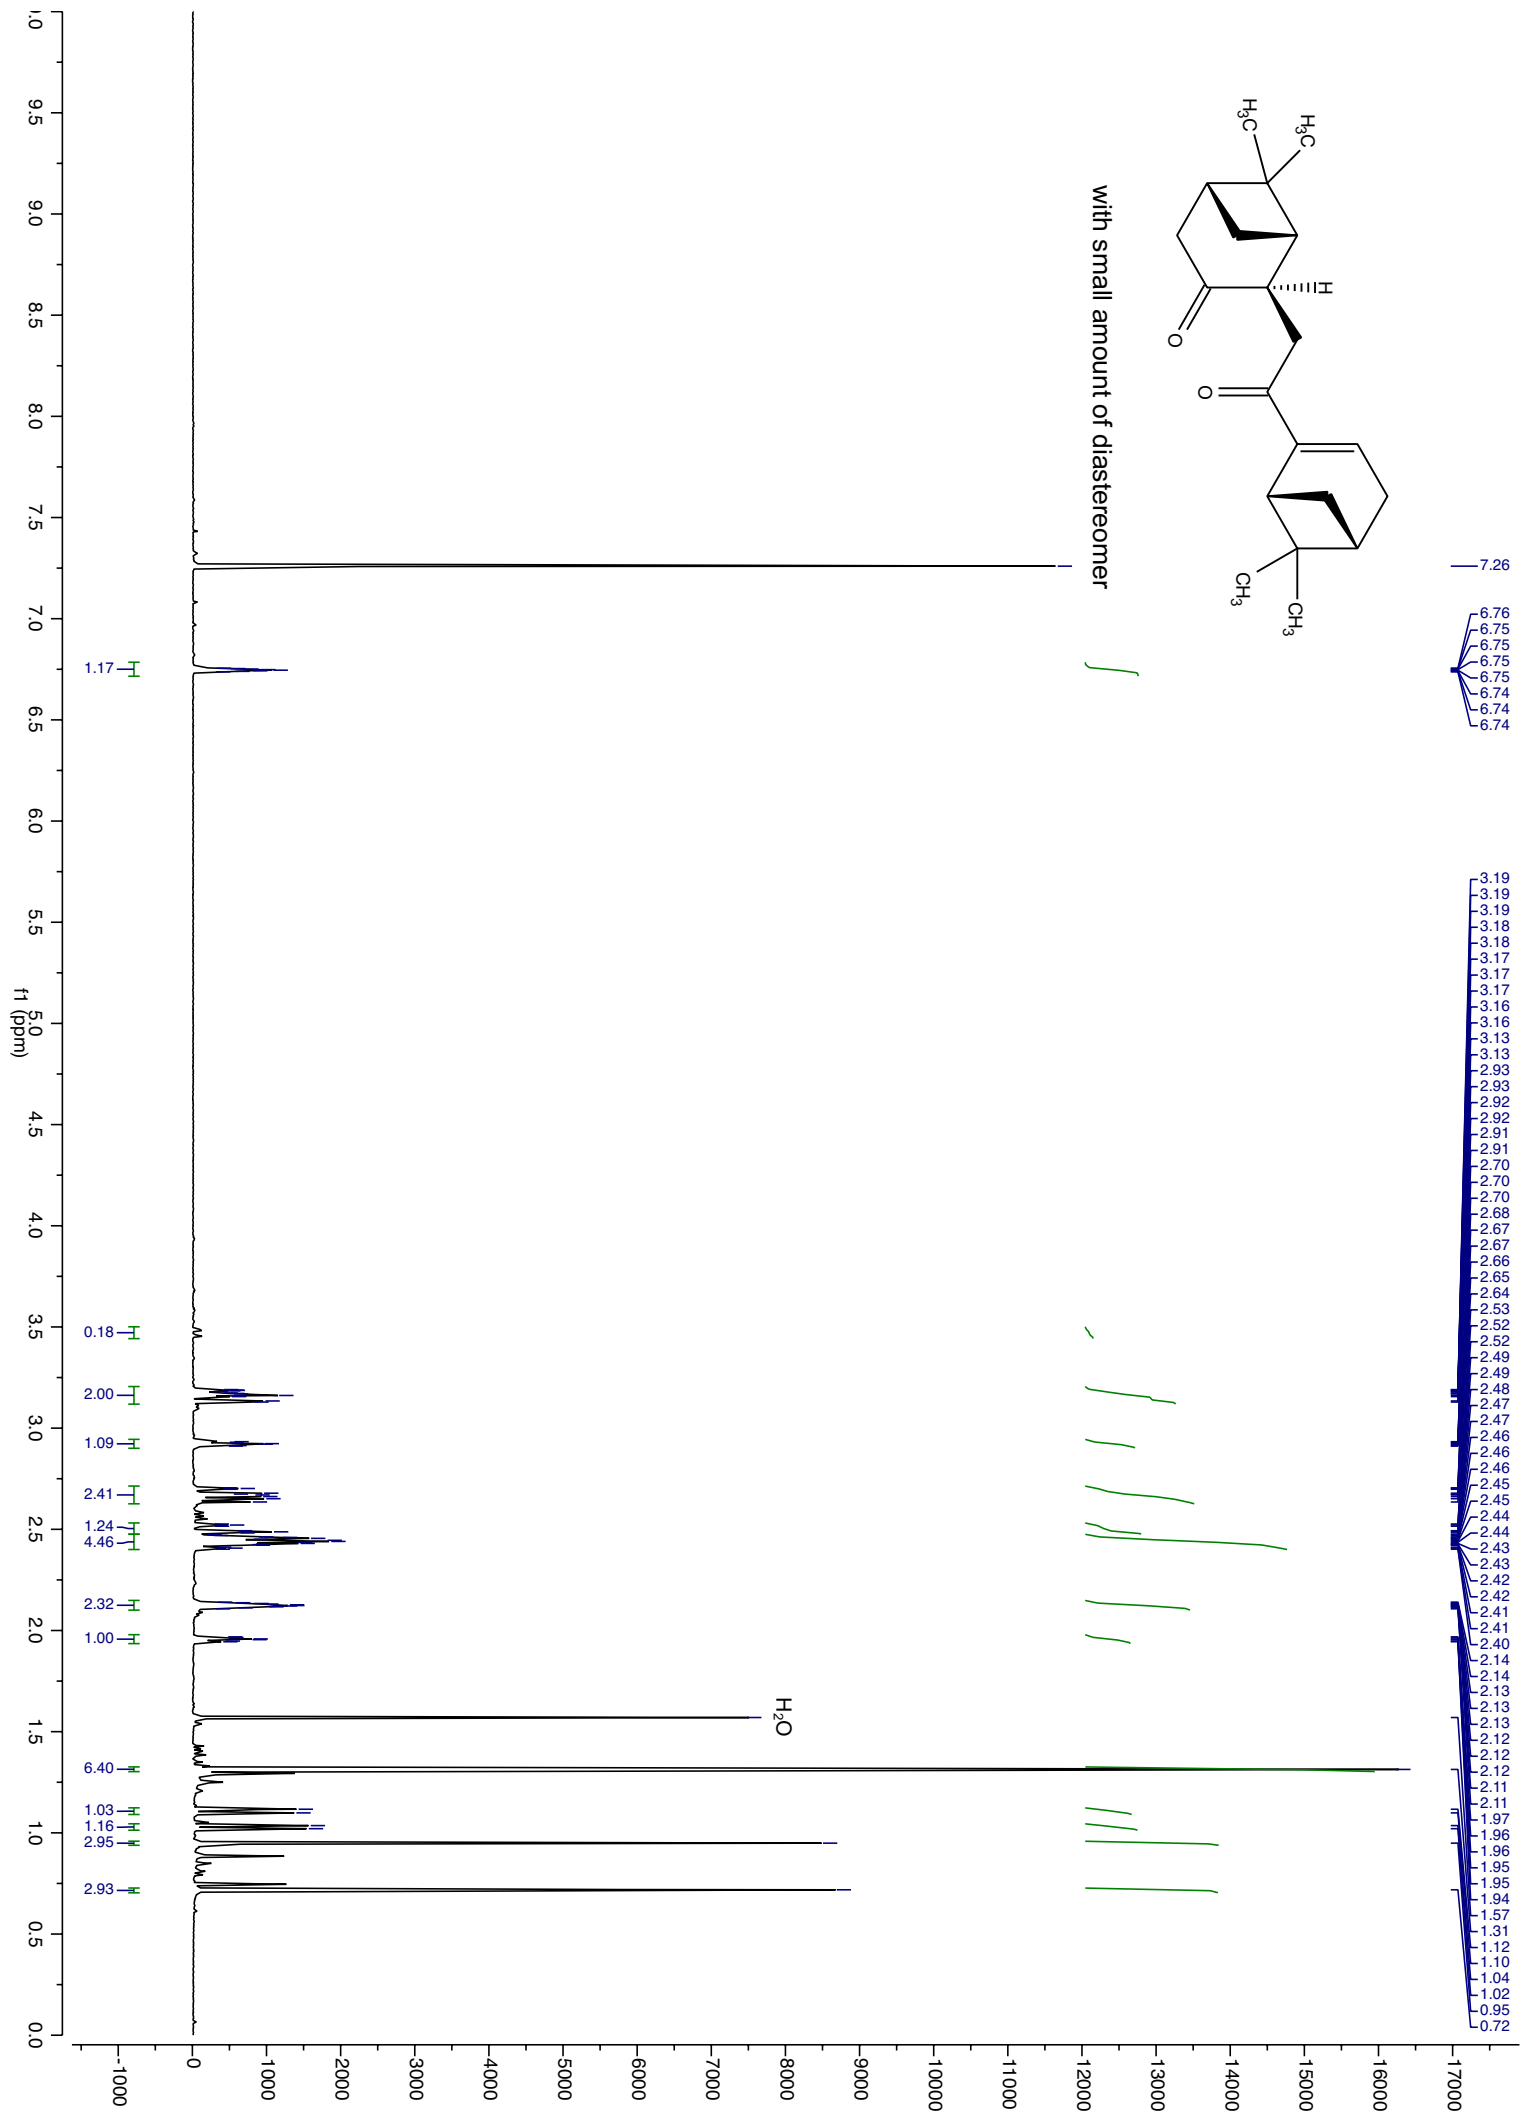

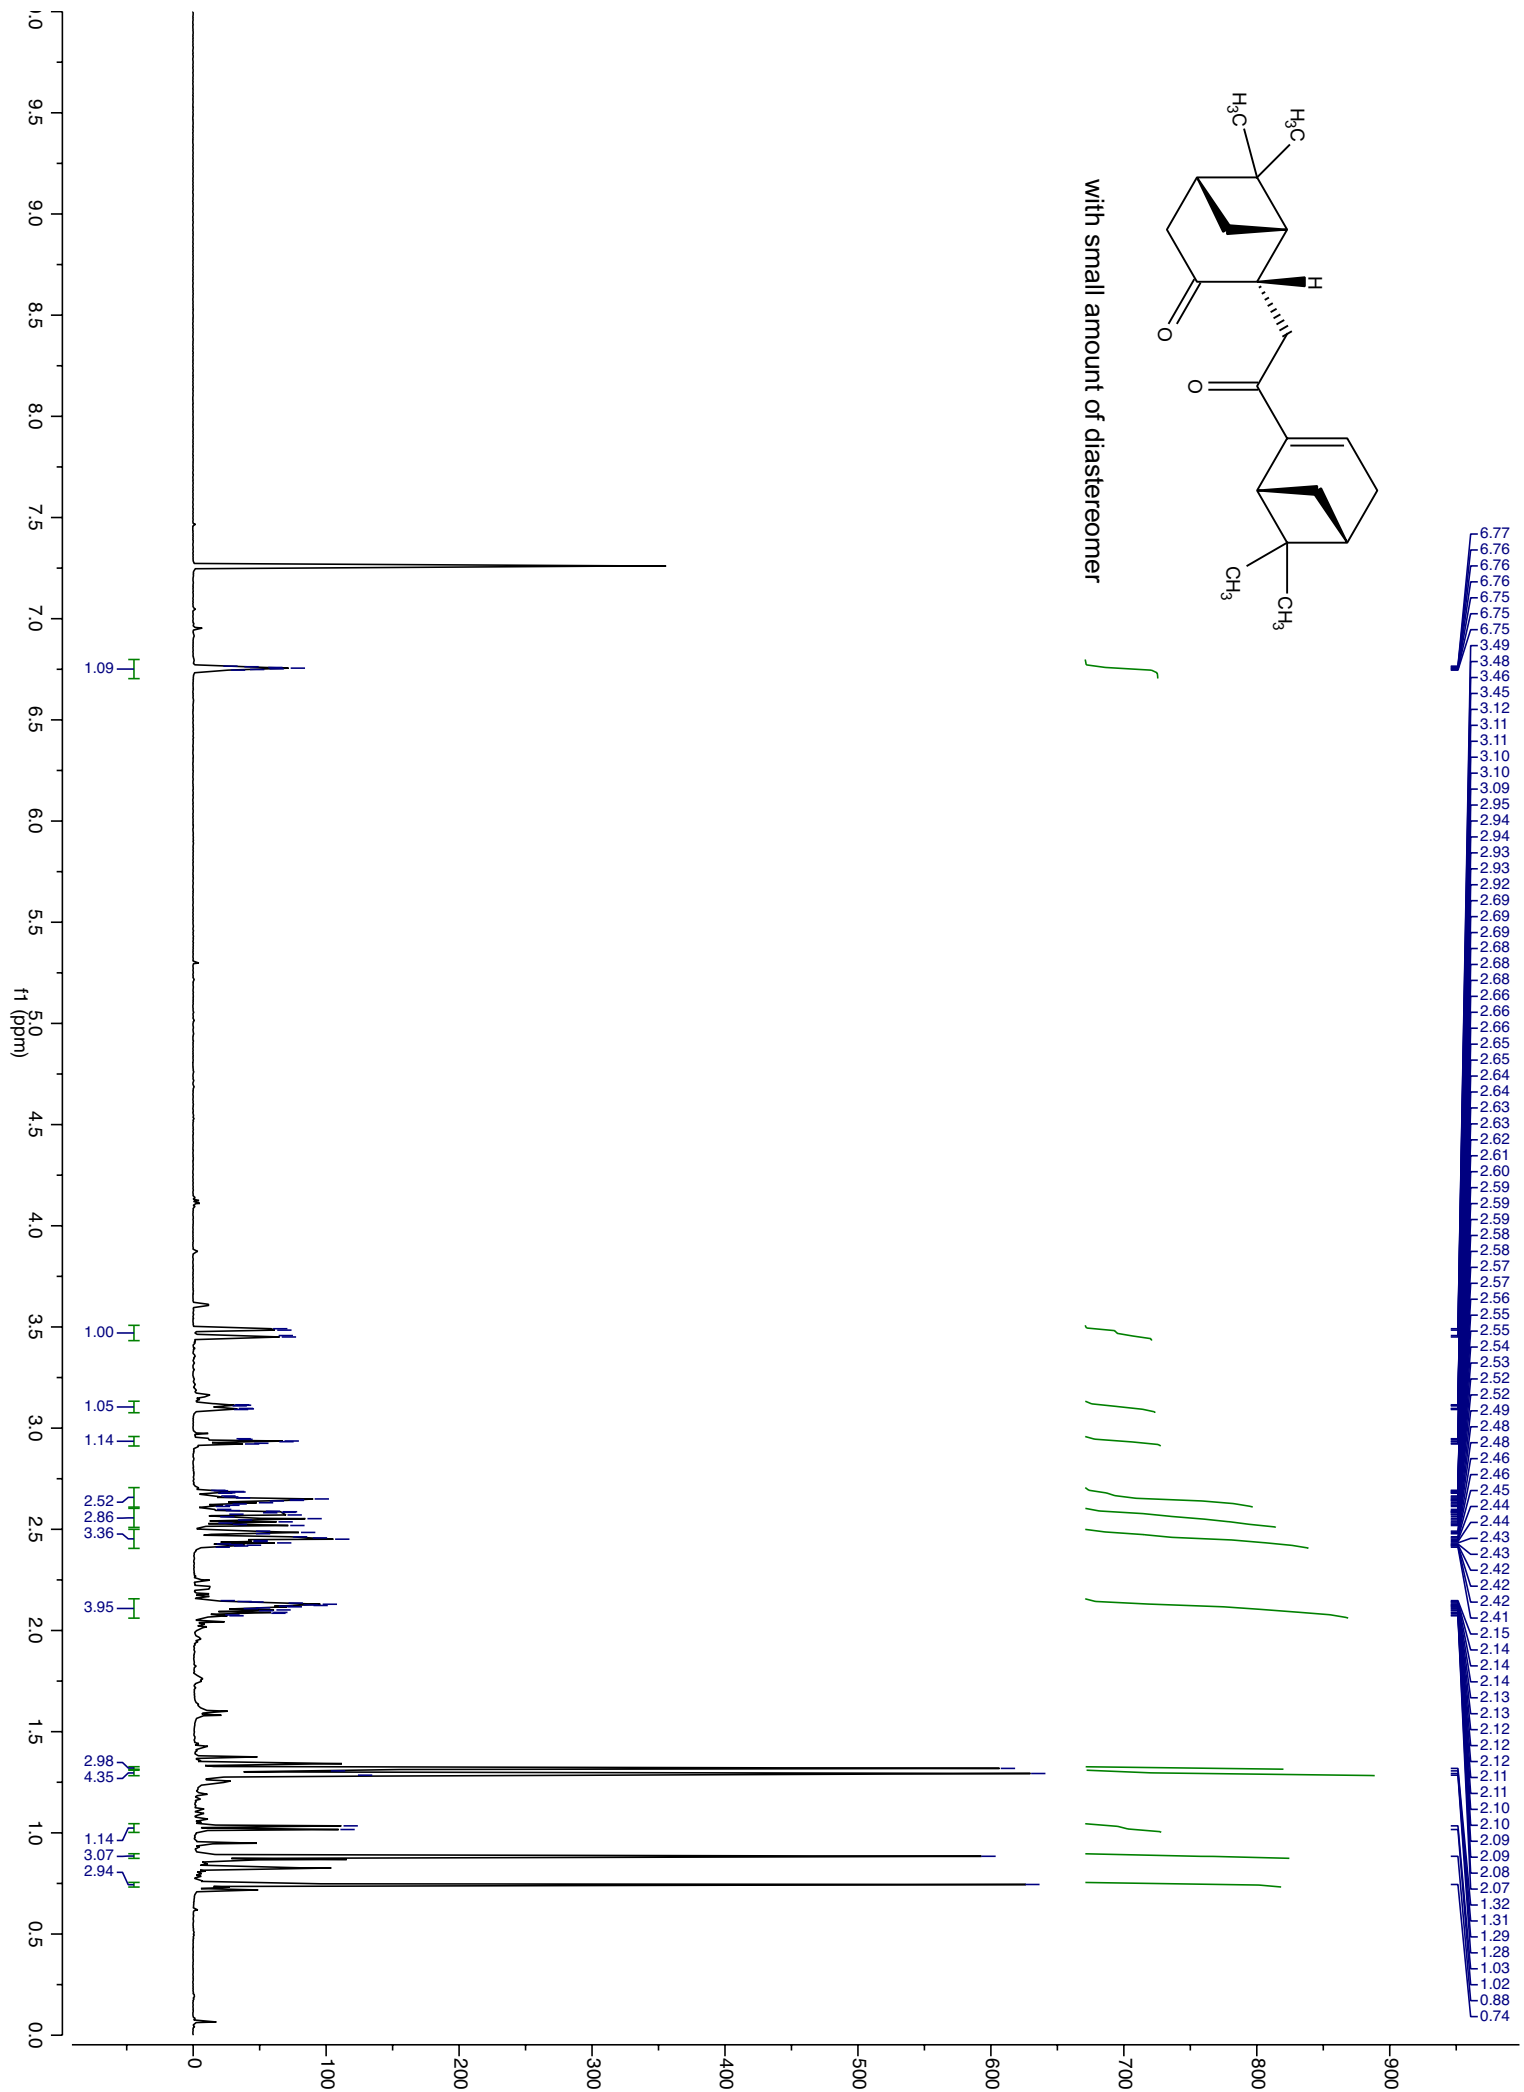

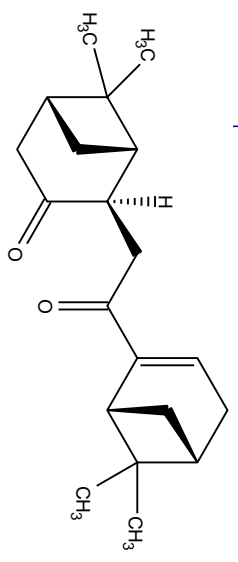

with small amount of diastereomer

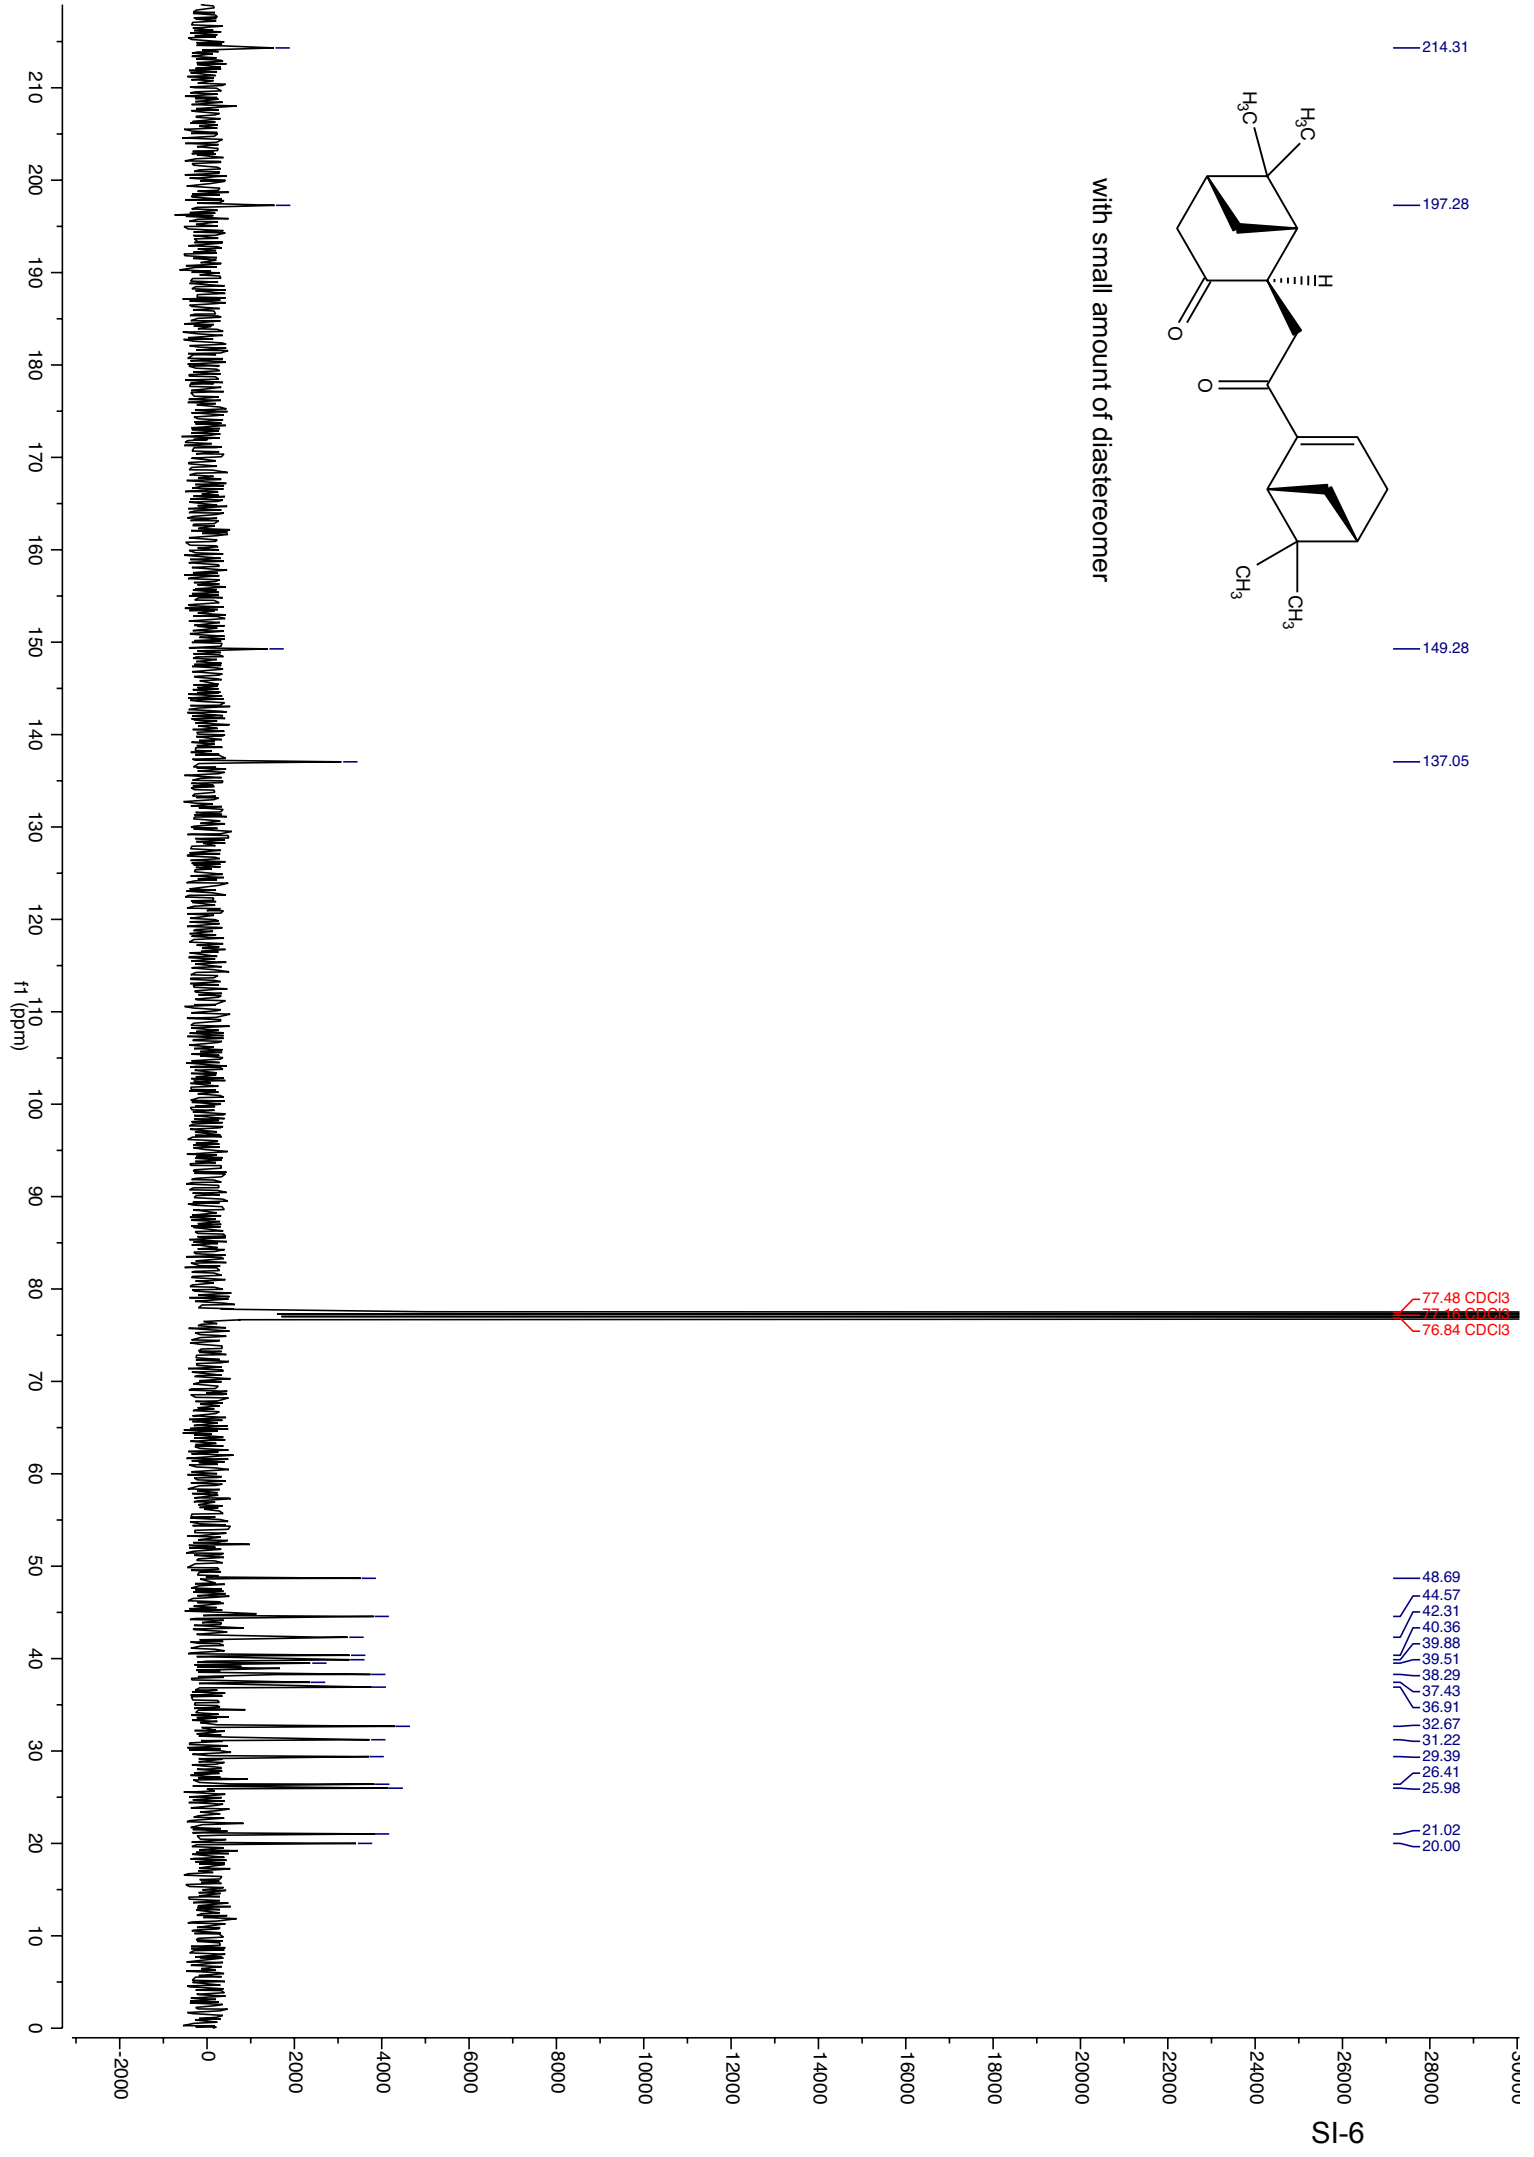

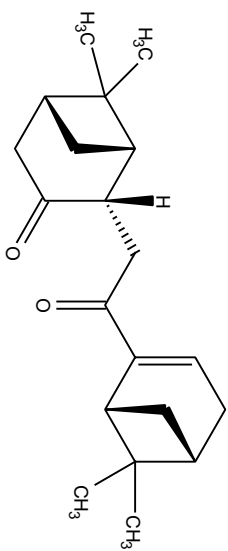

with small amount of diastereomer

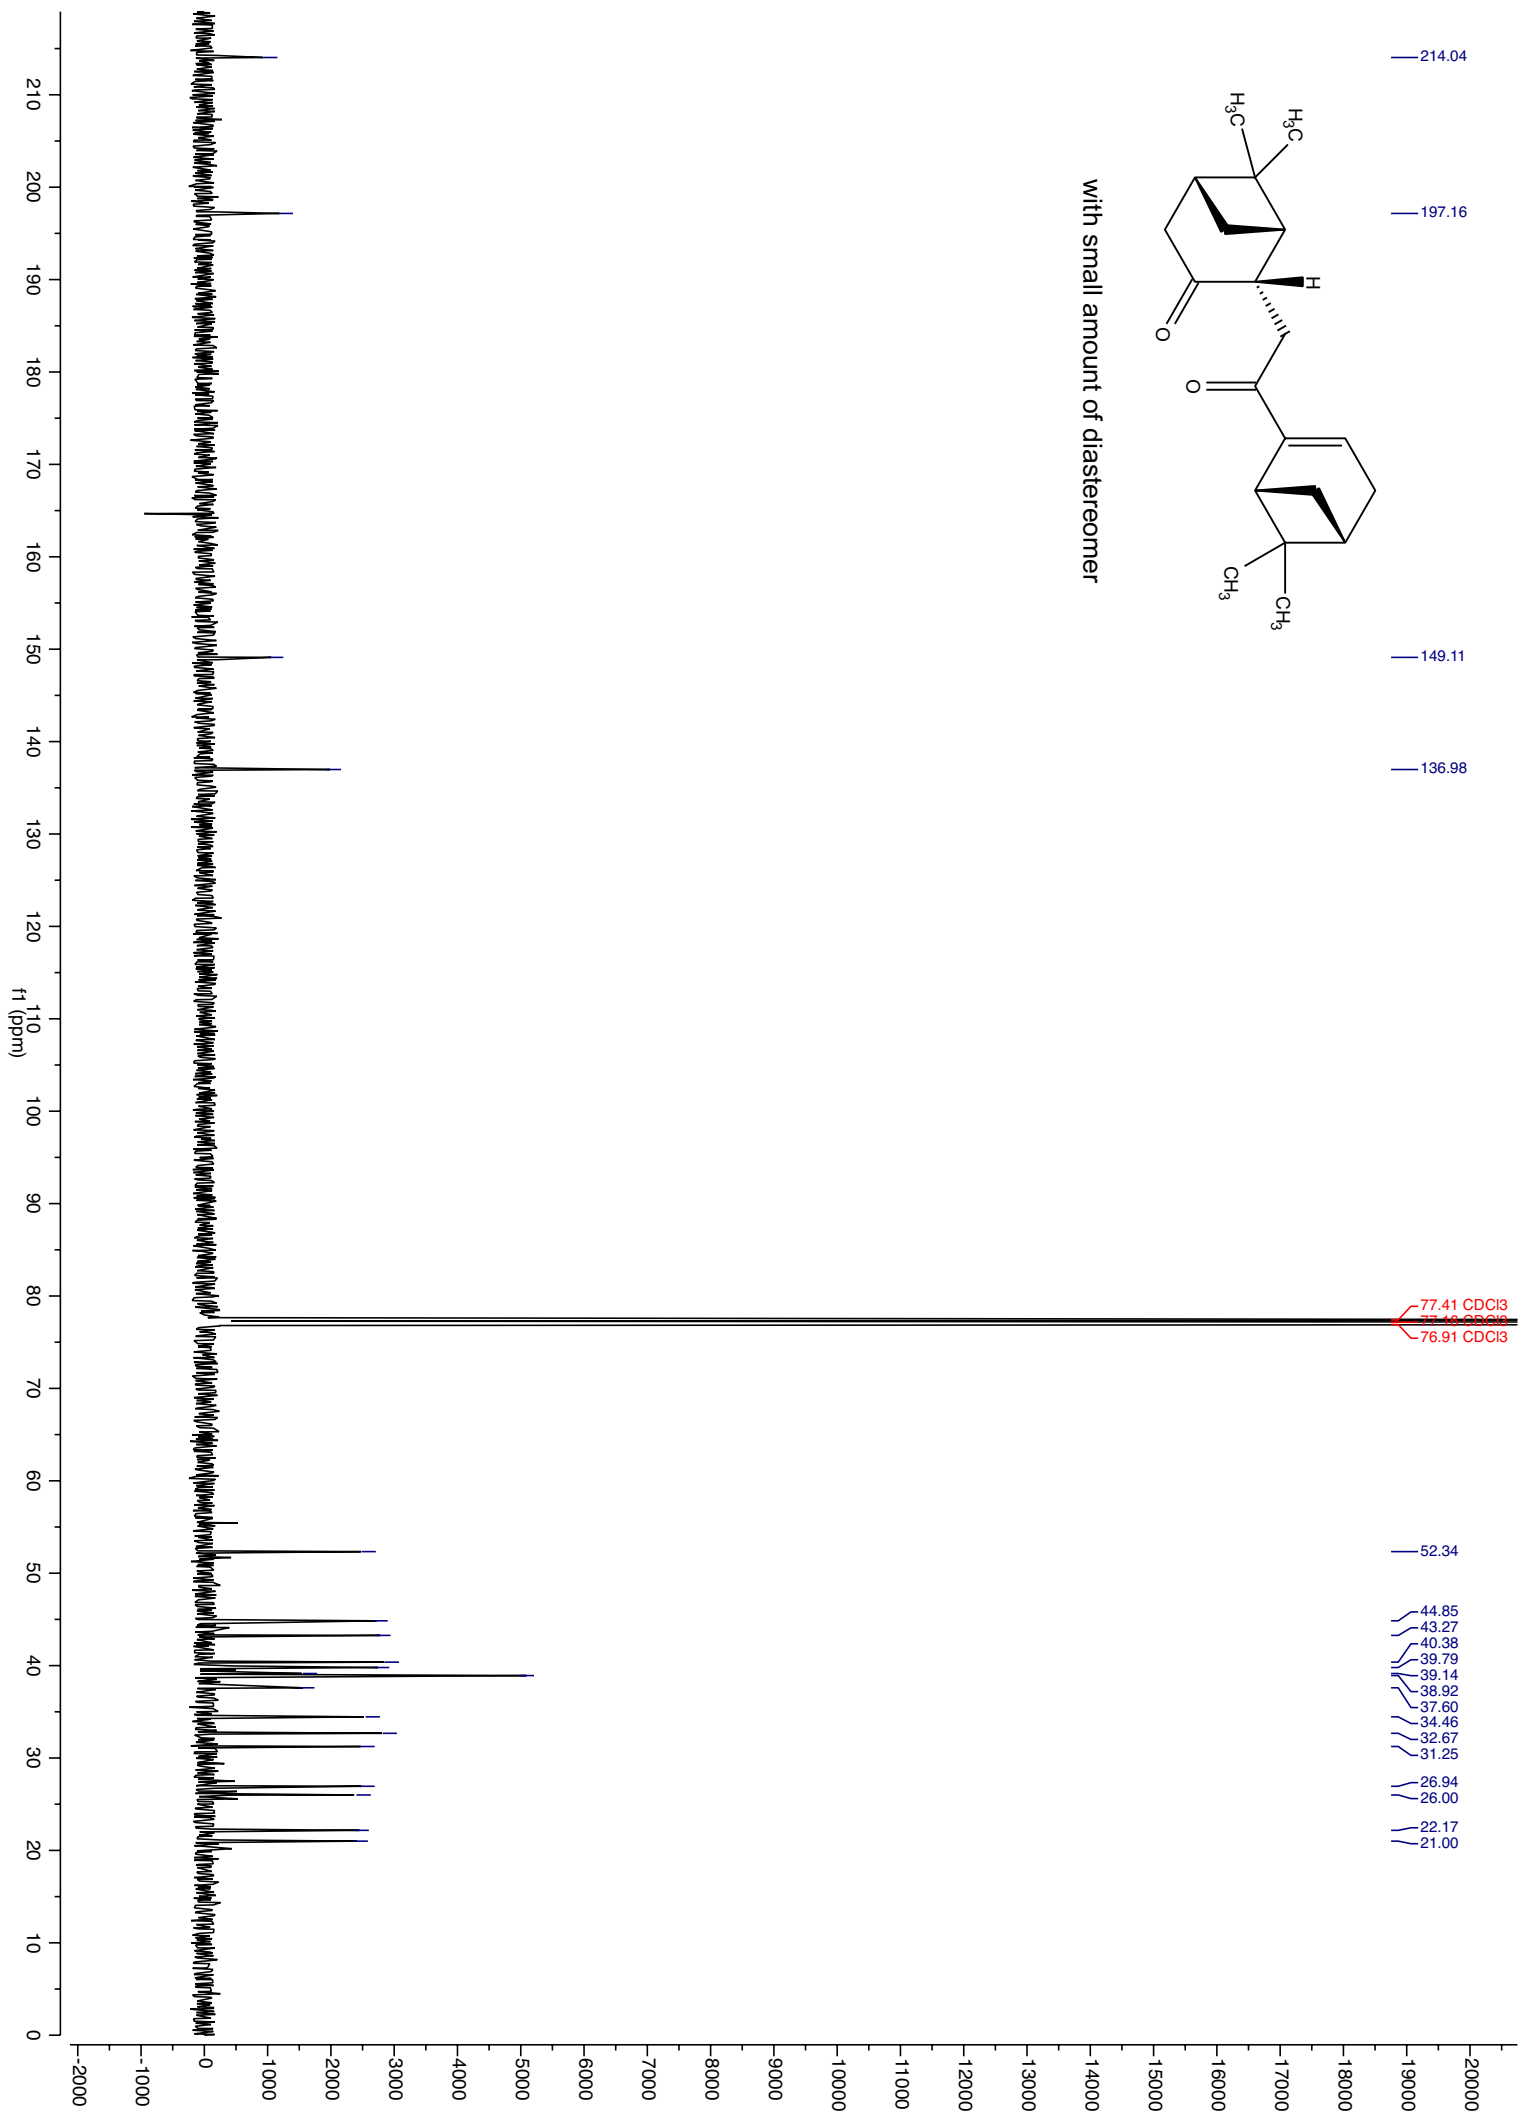

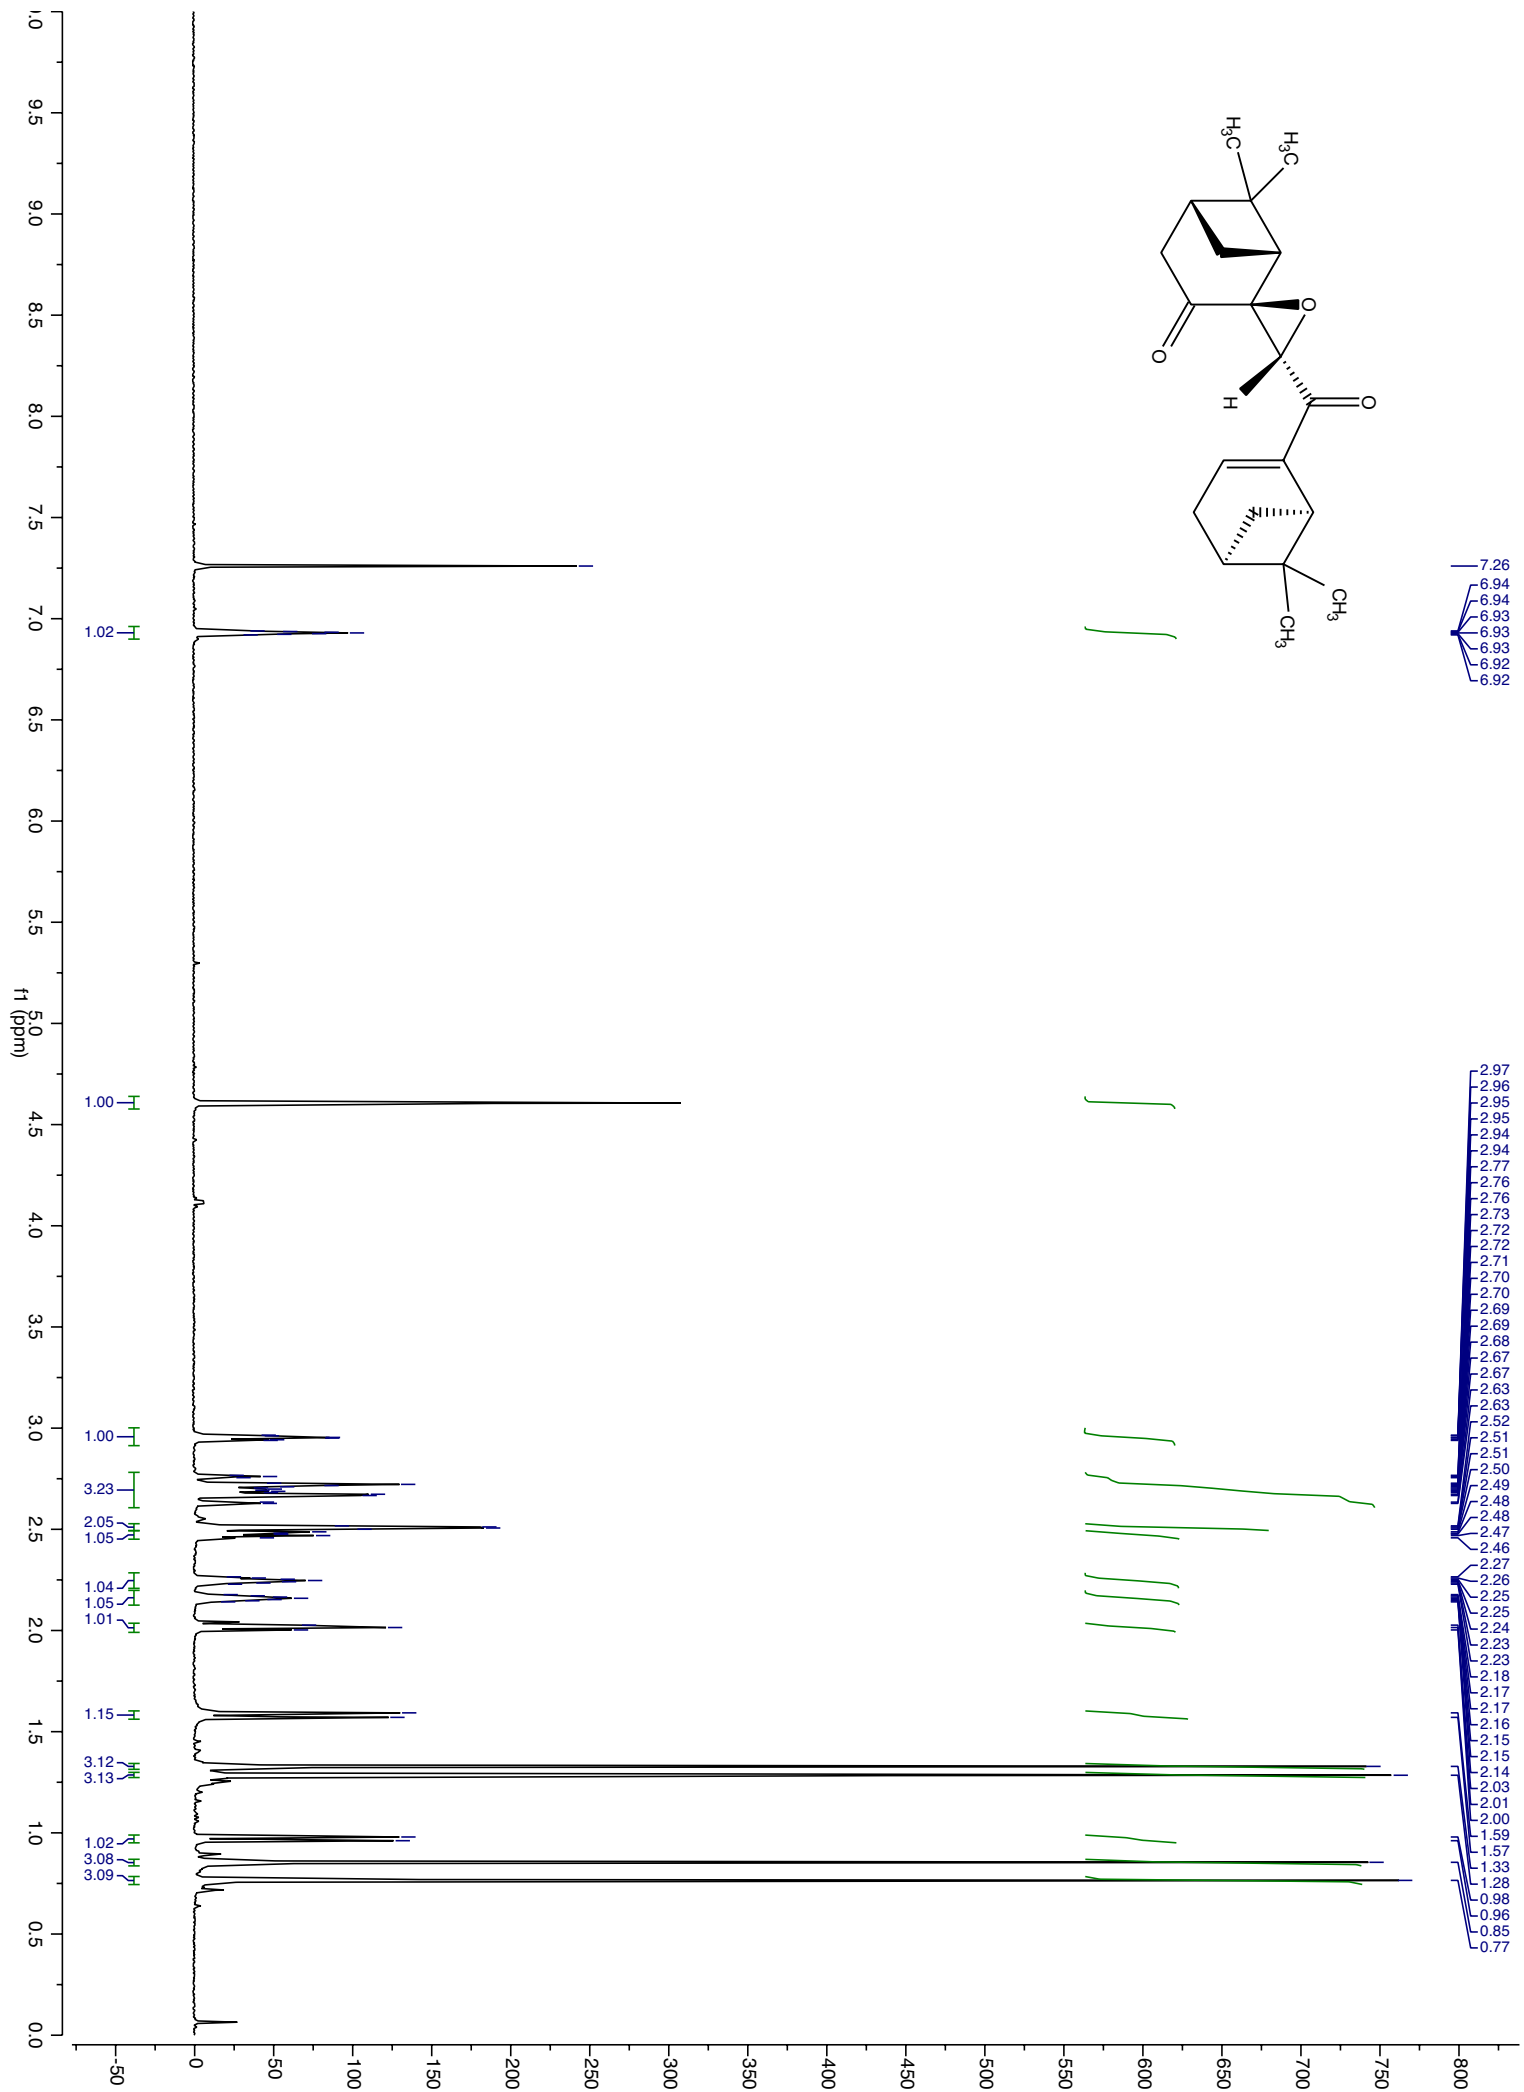



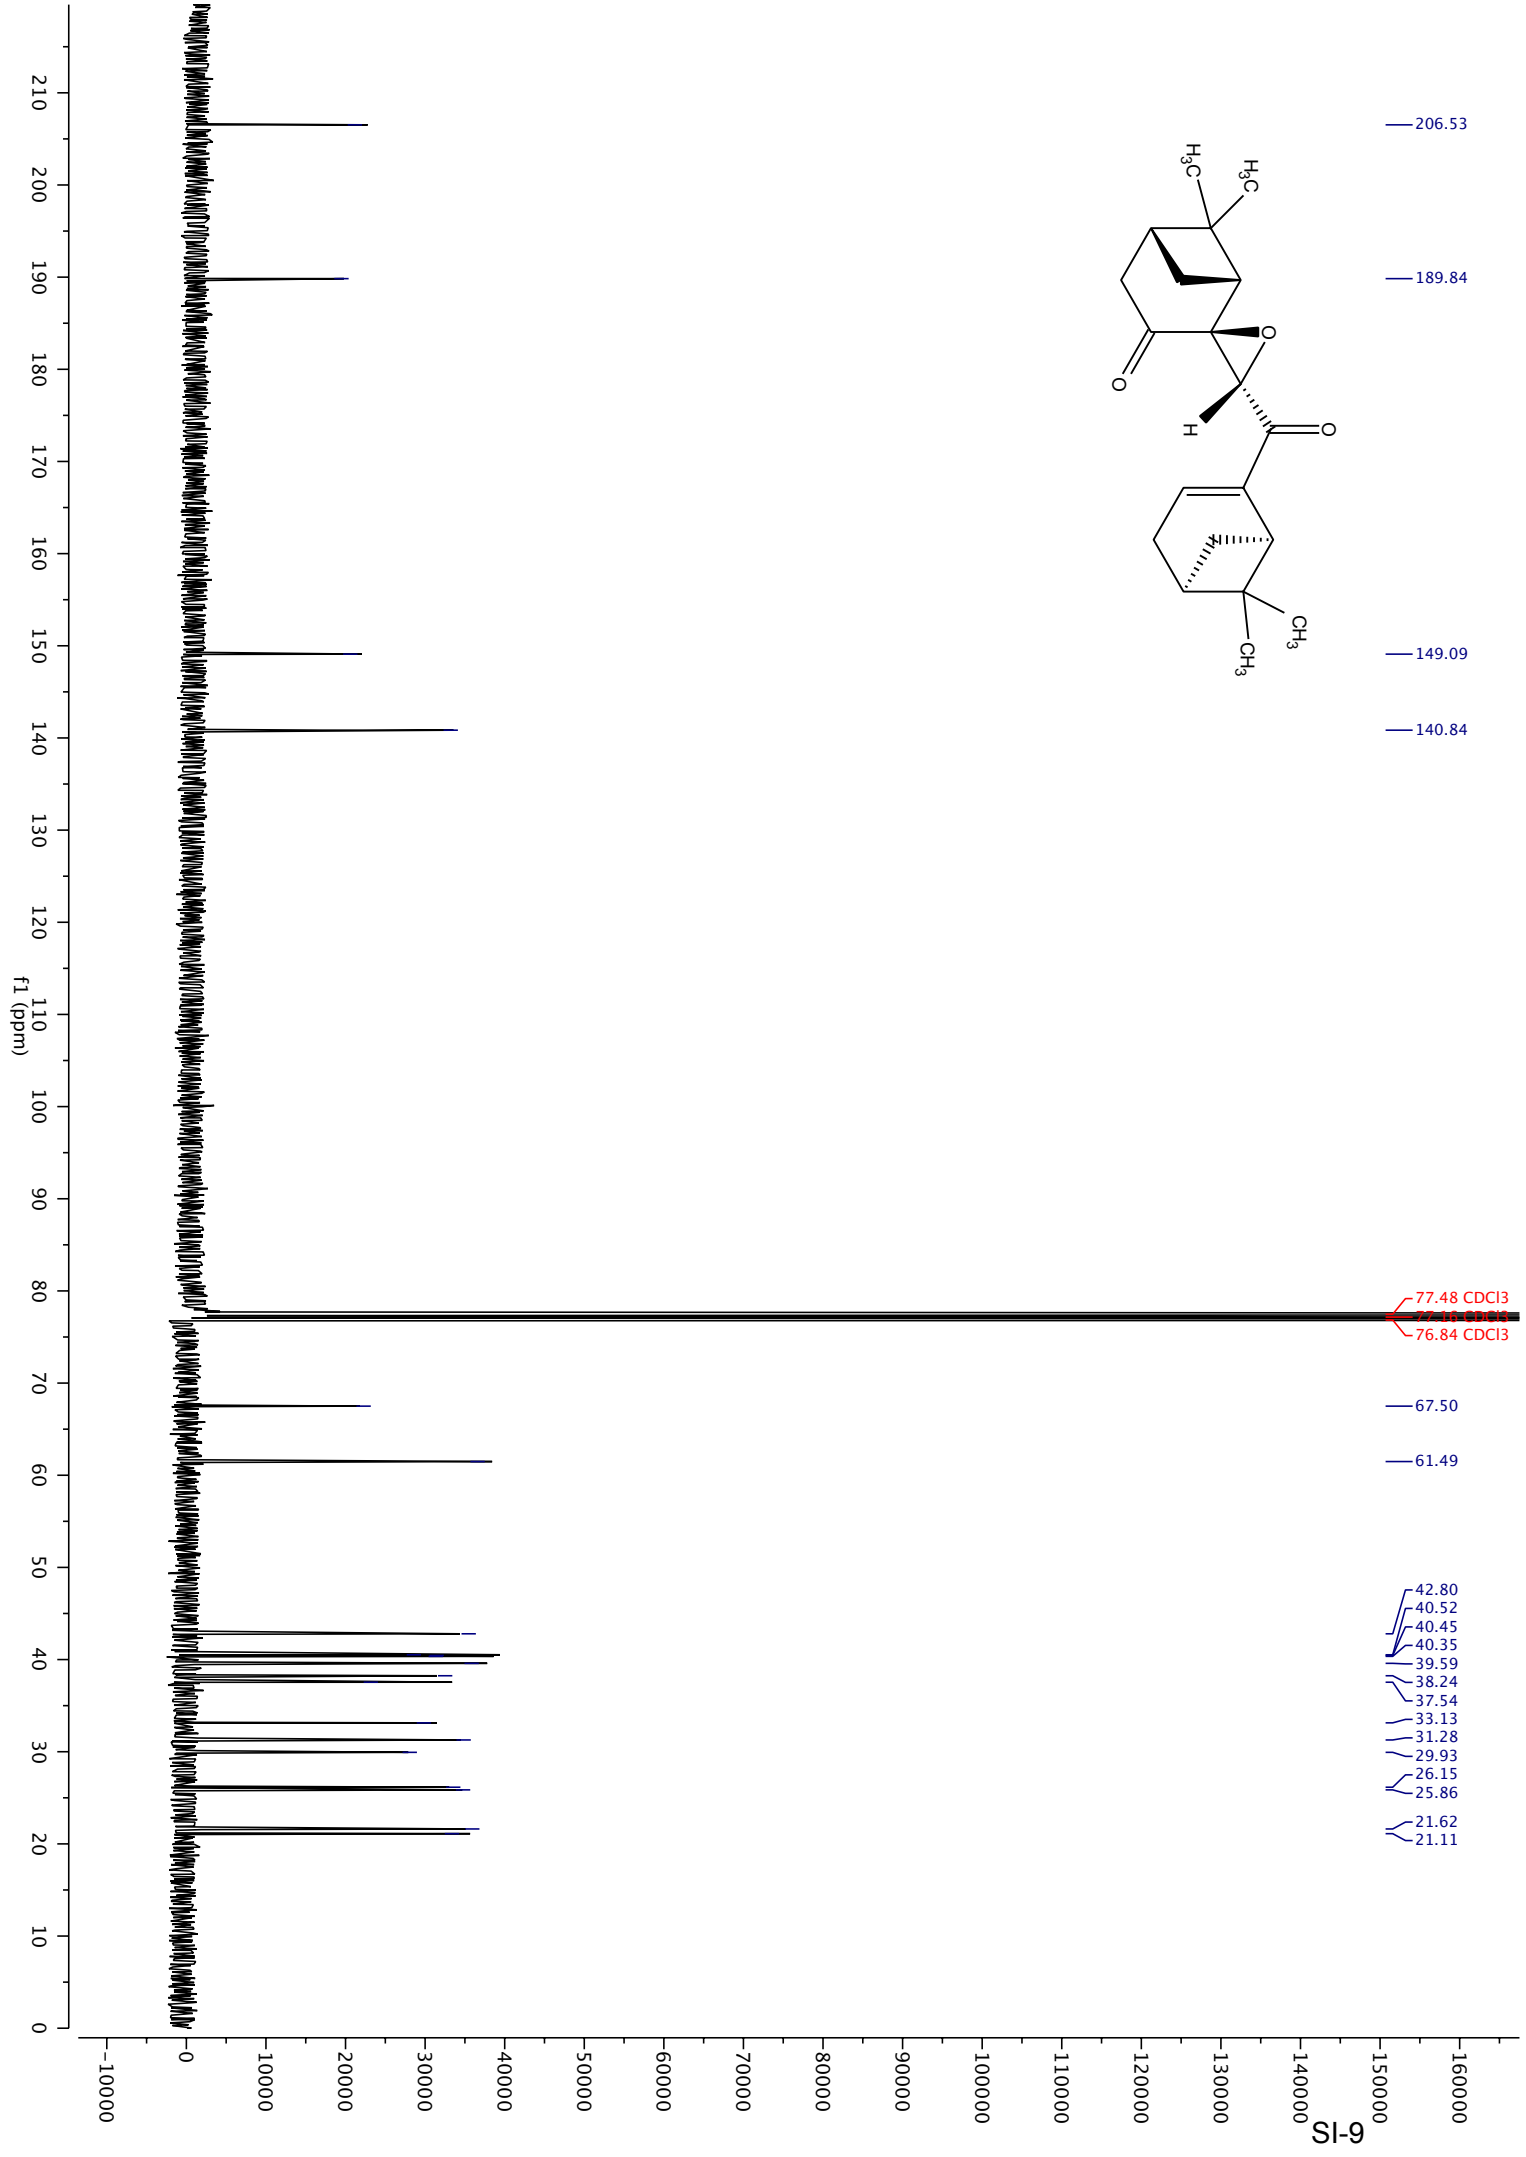

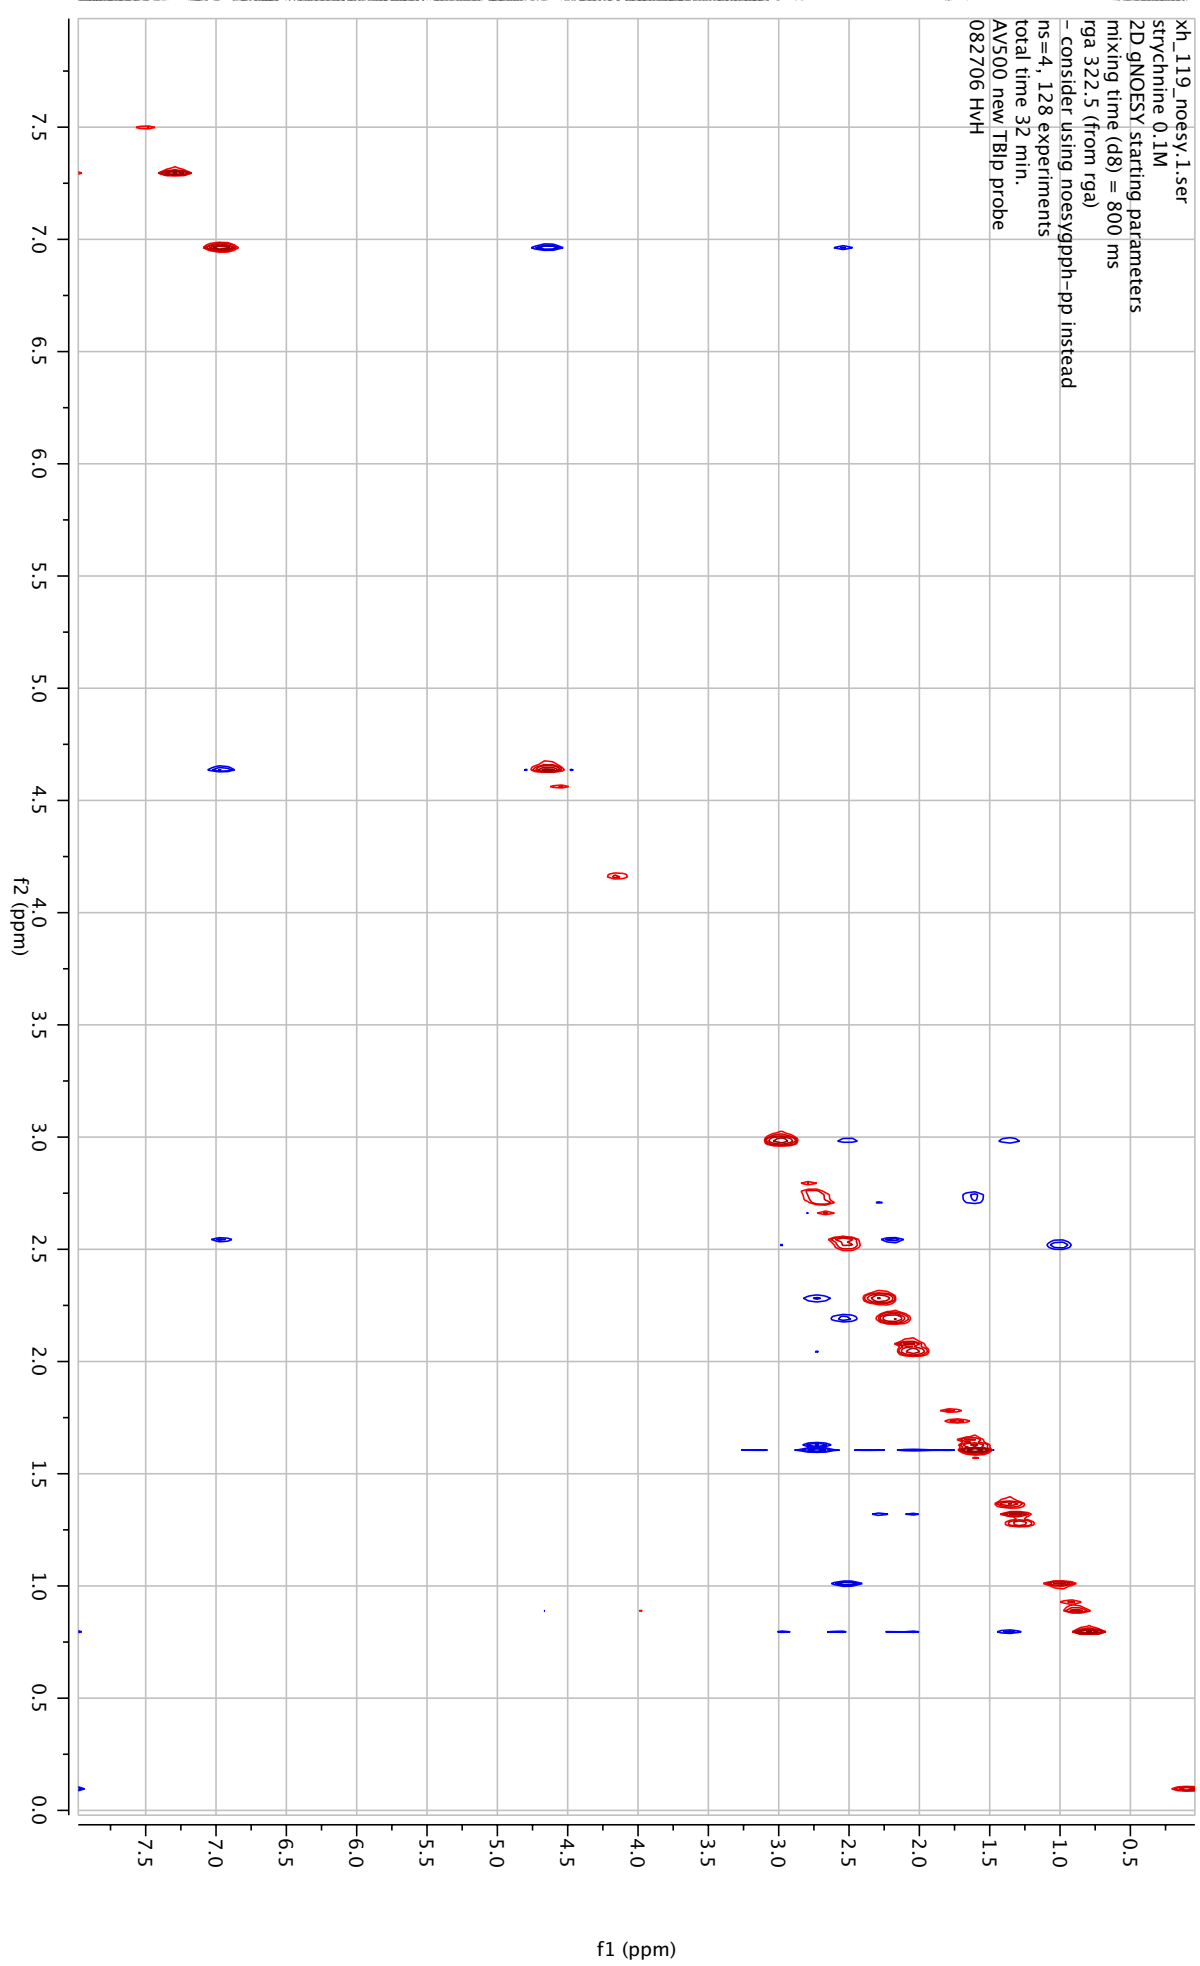

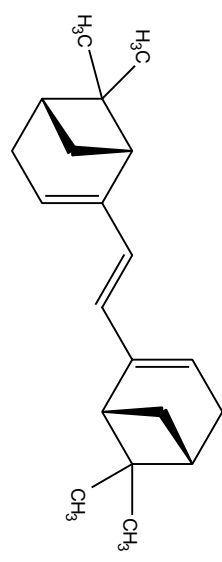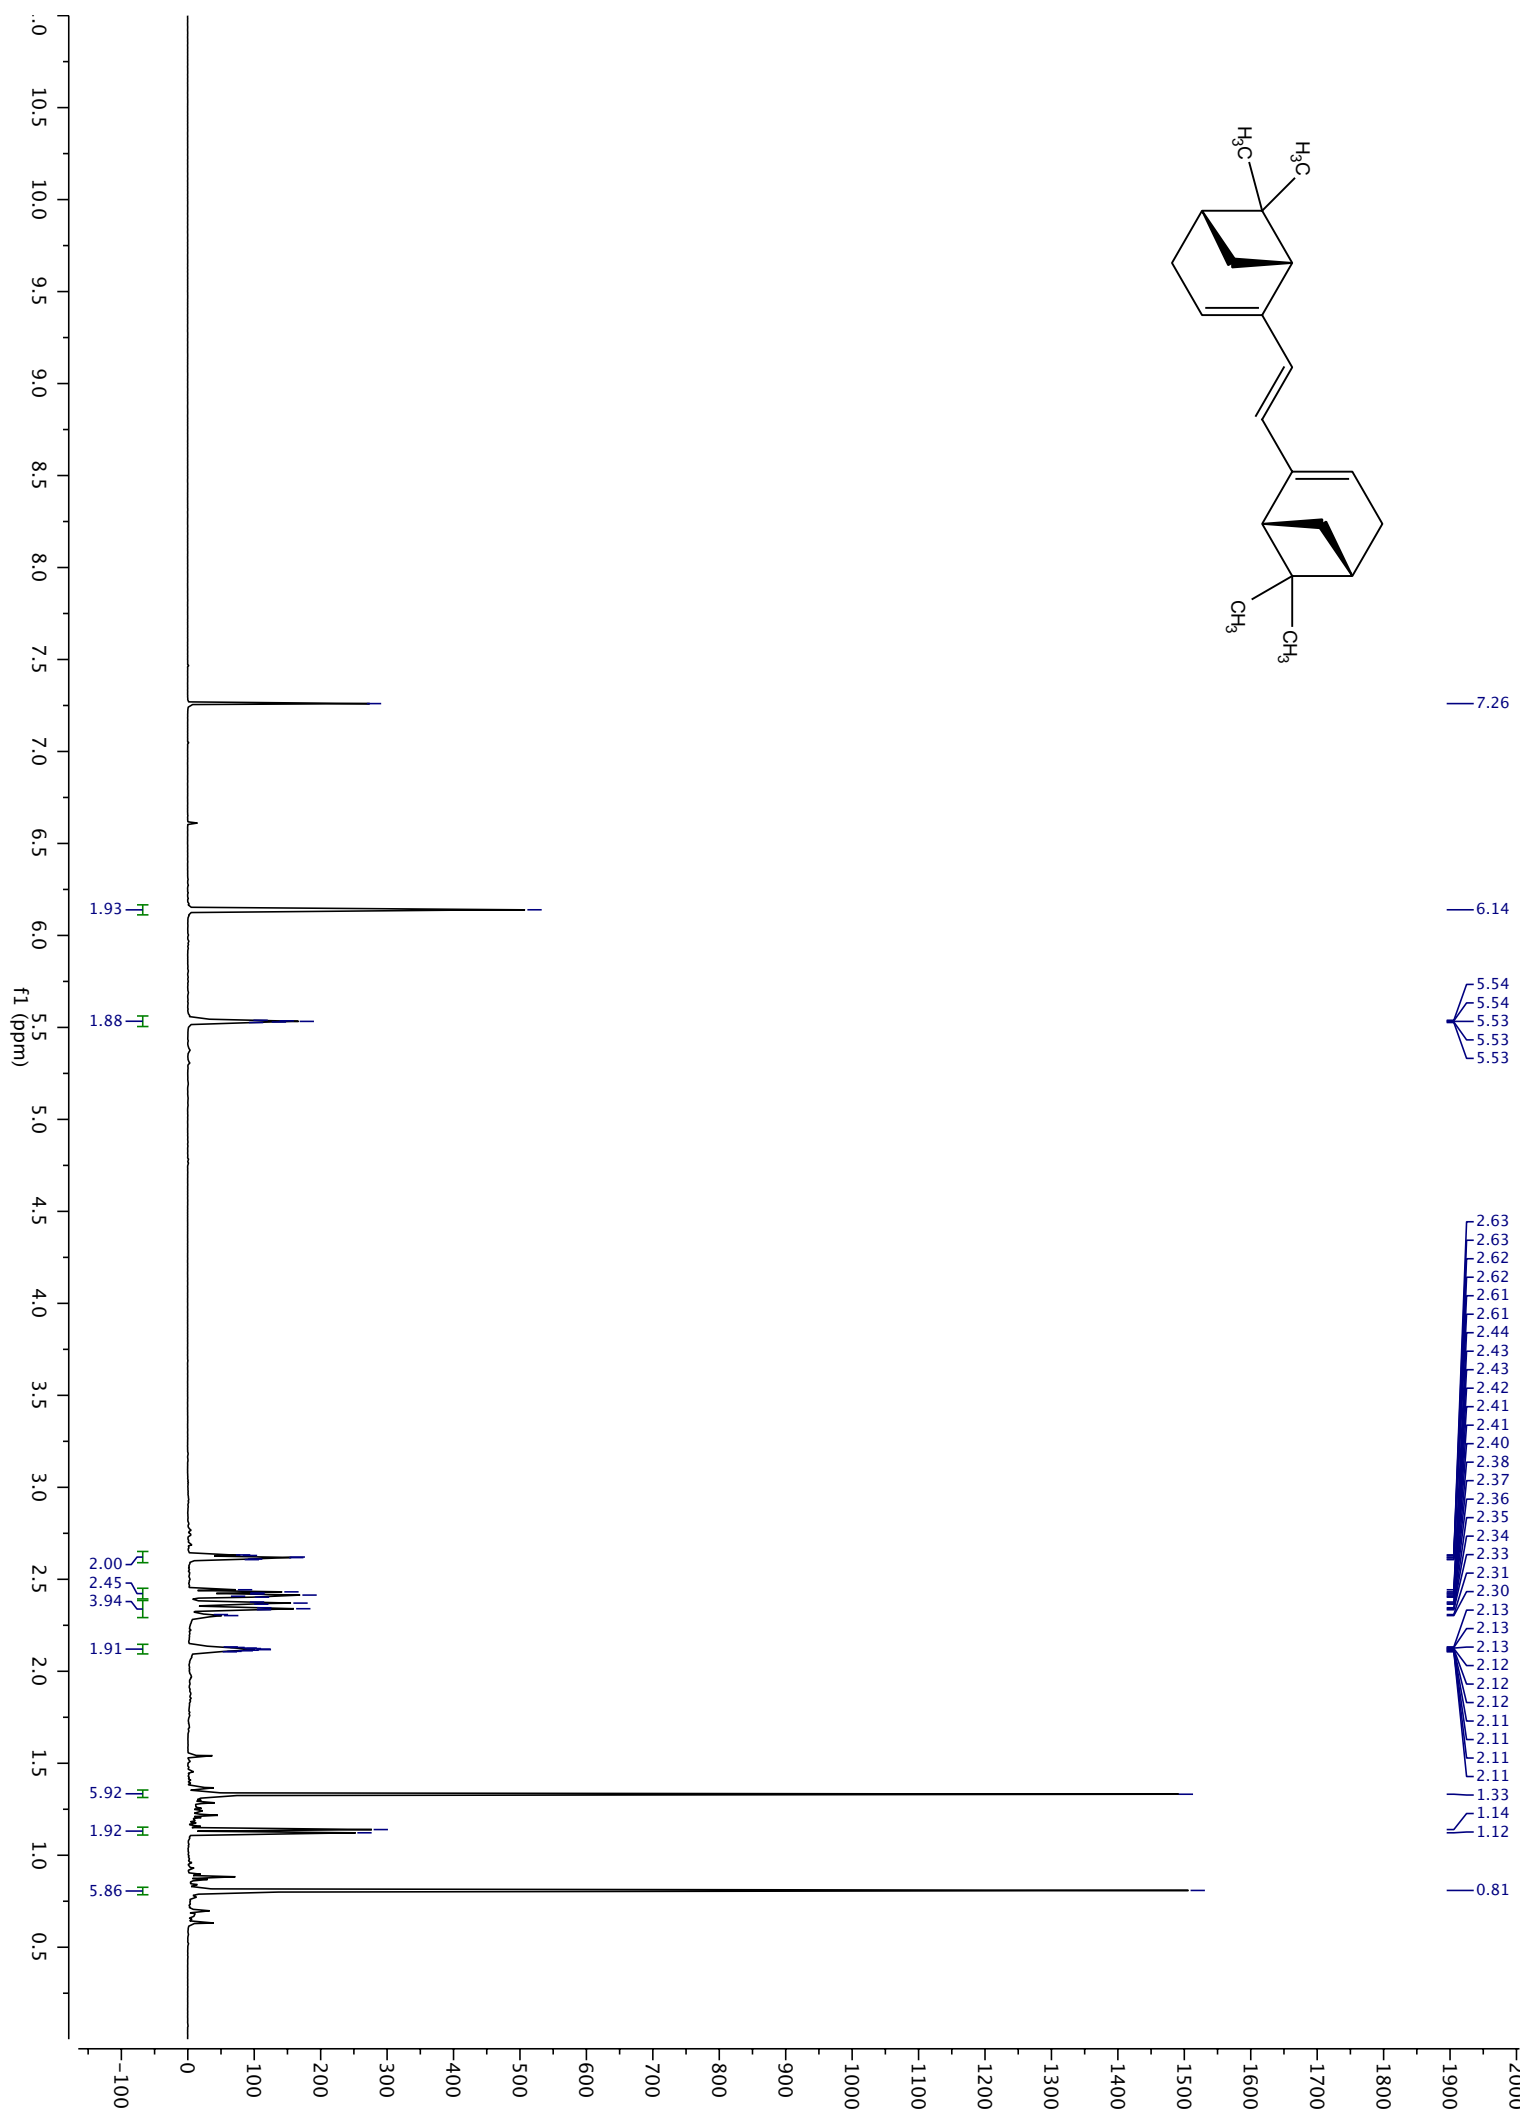

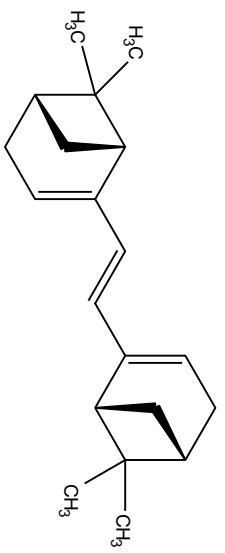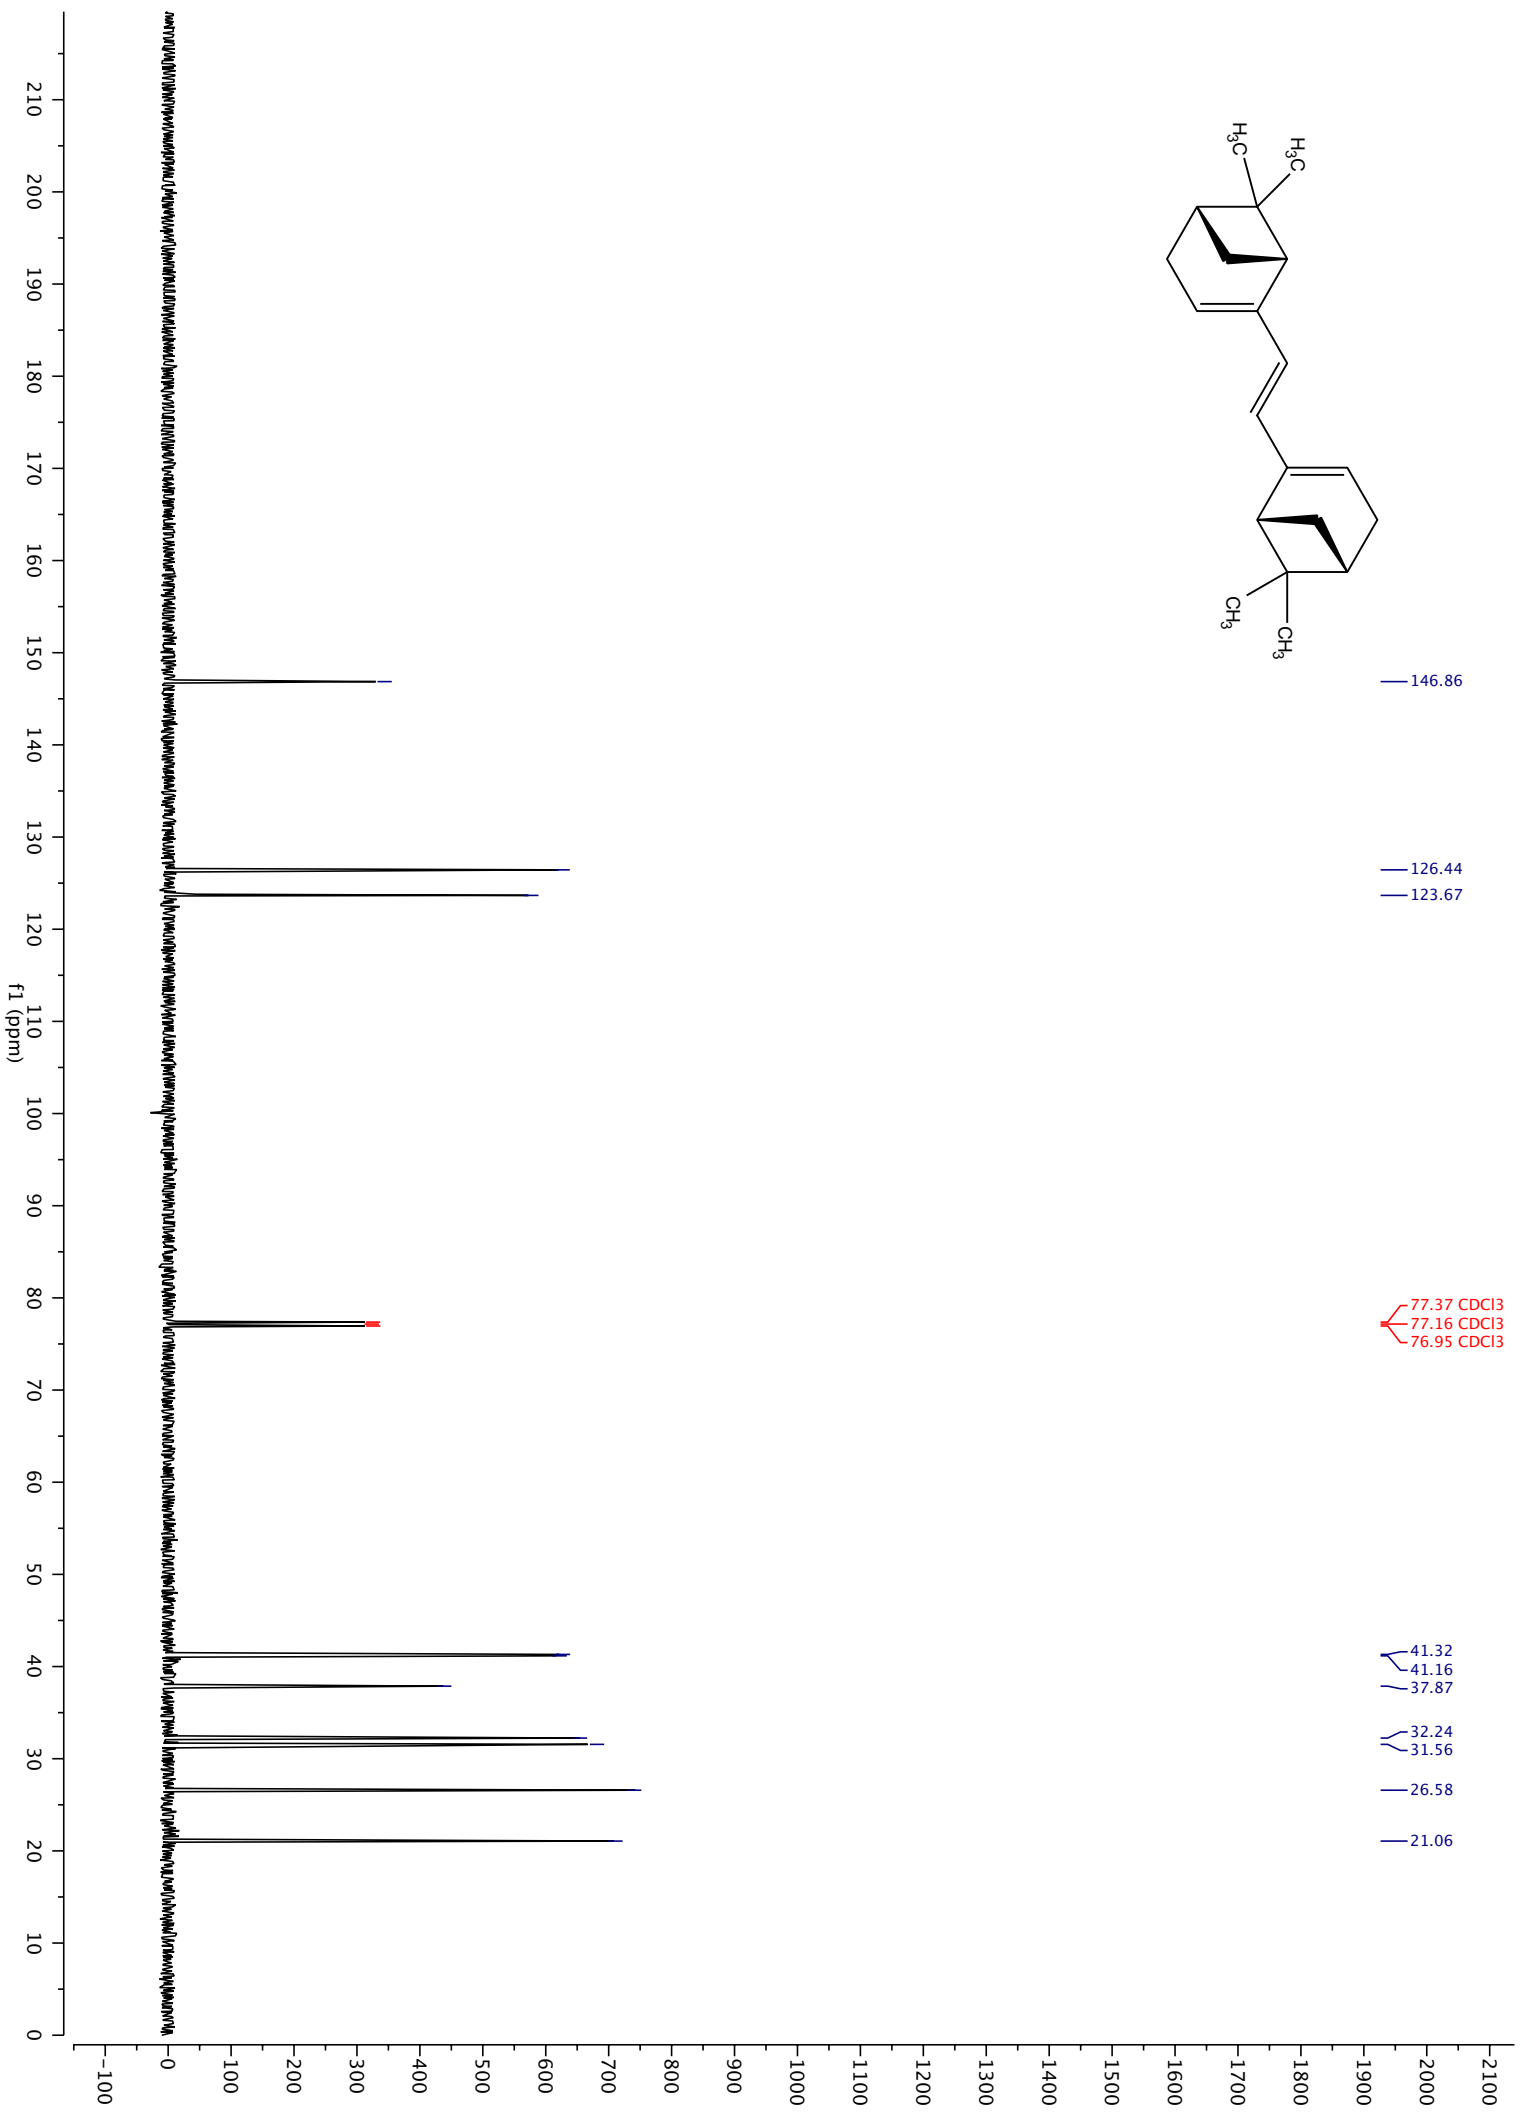

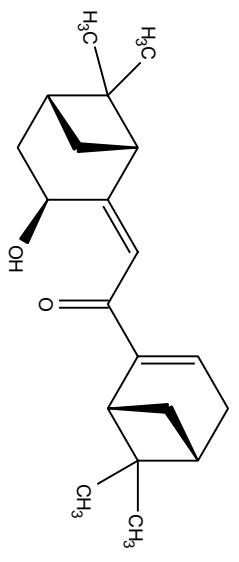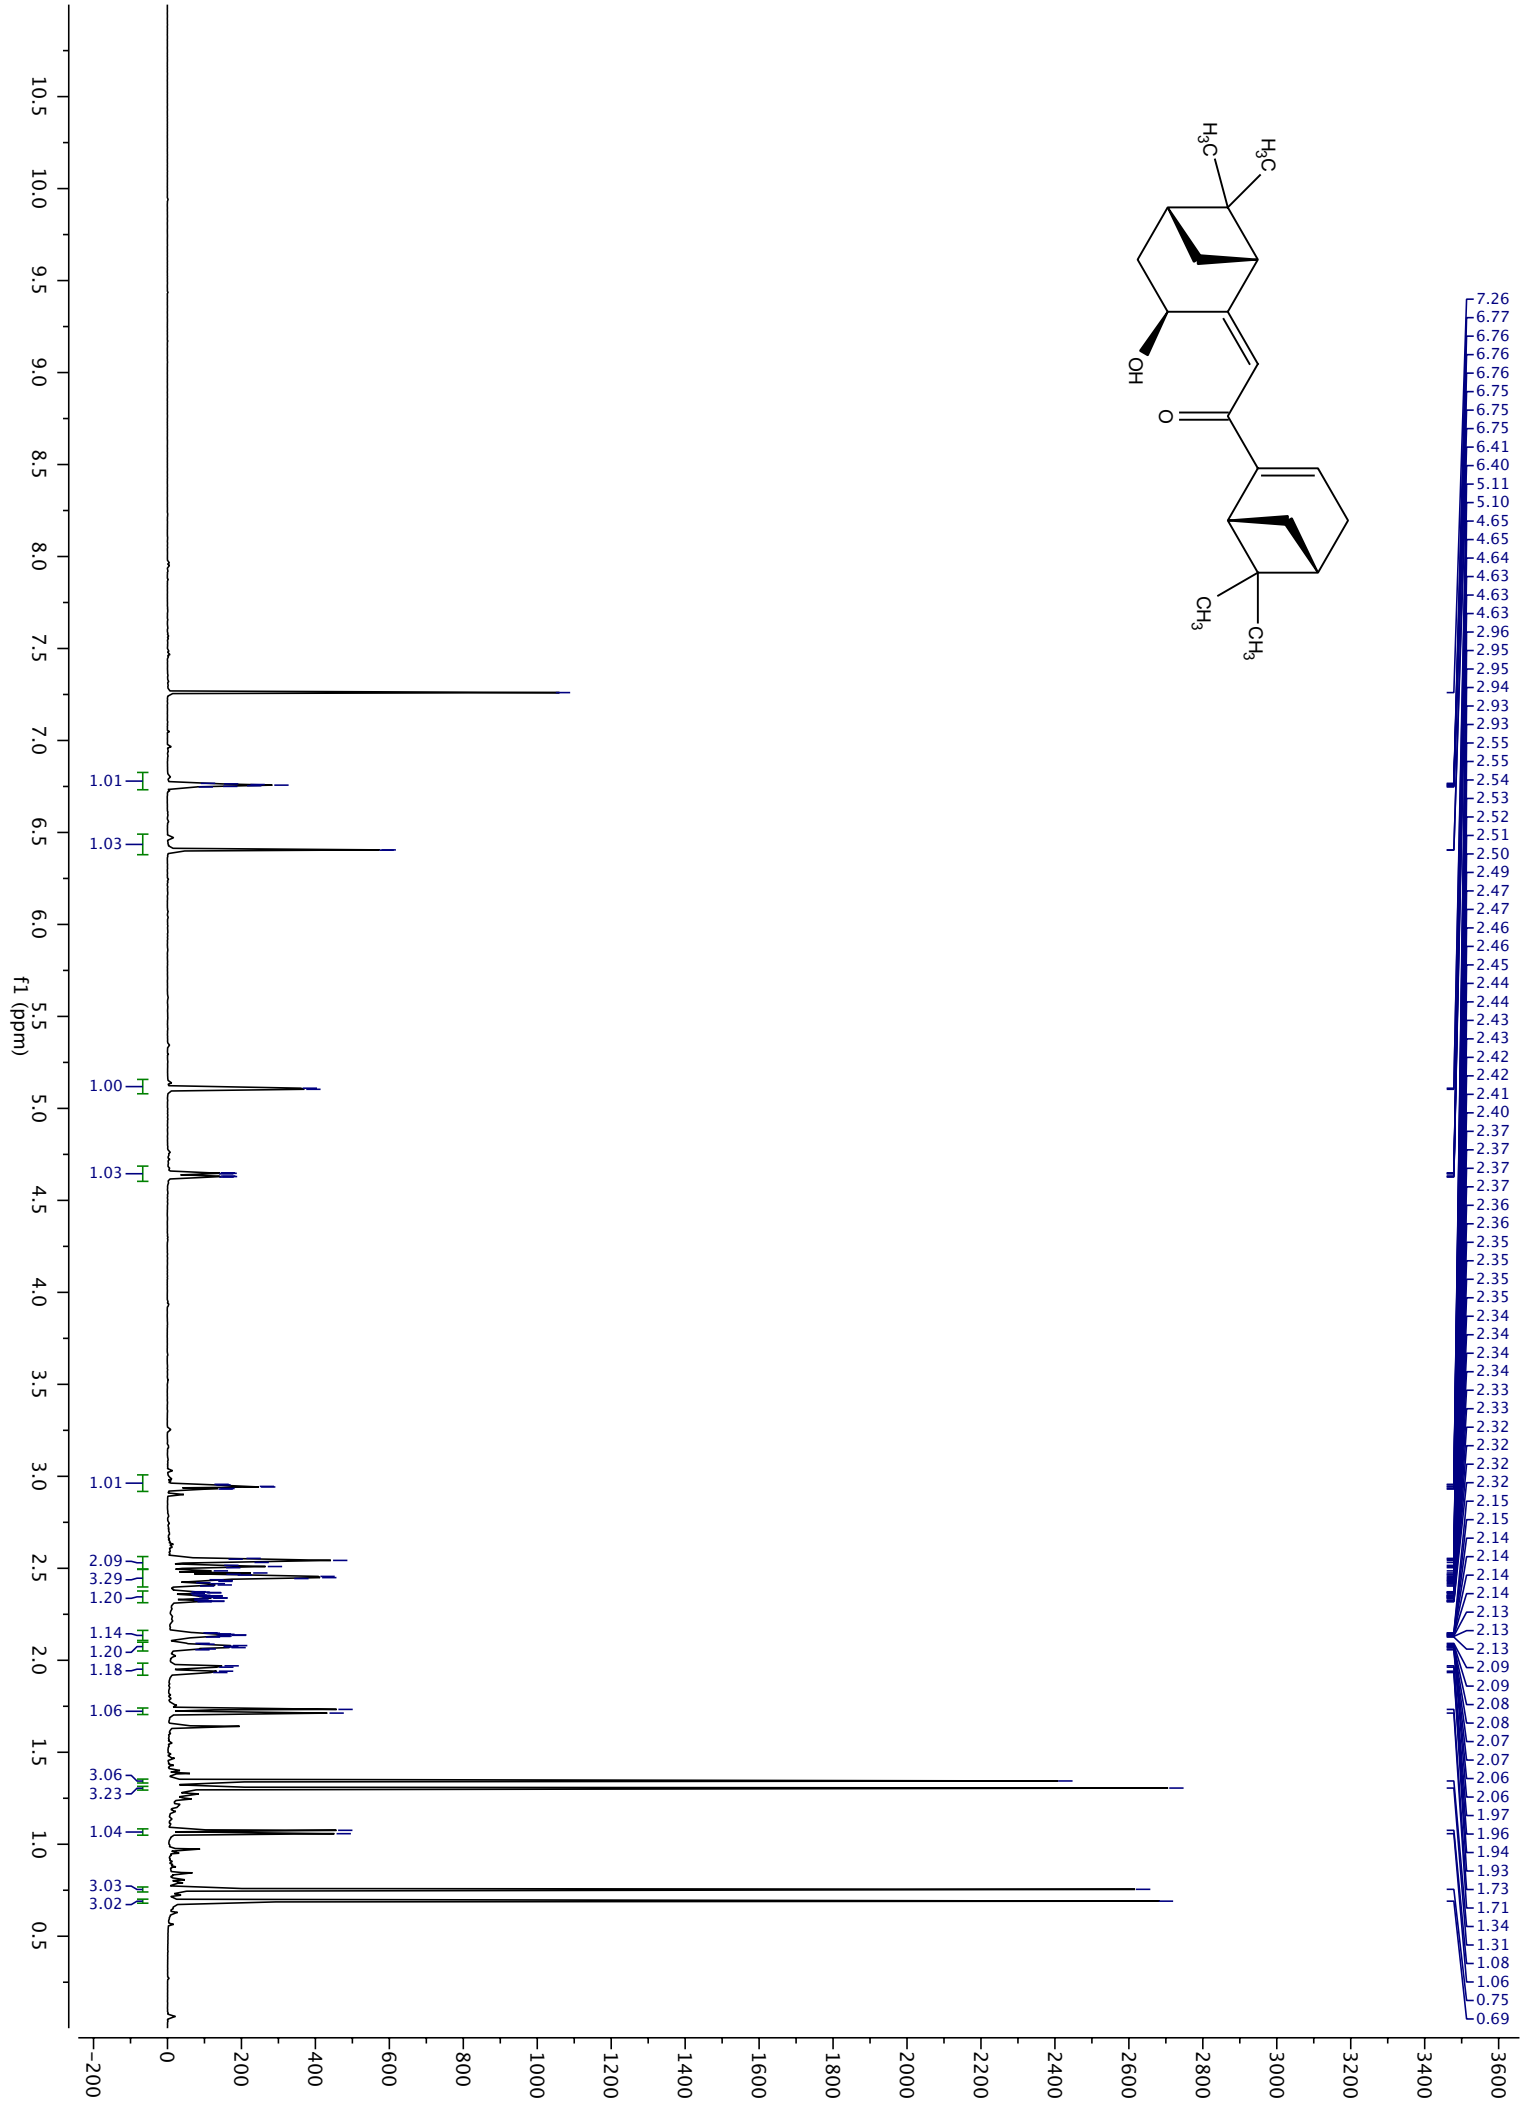

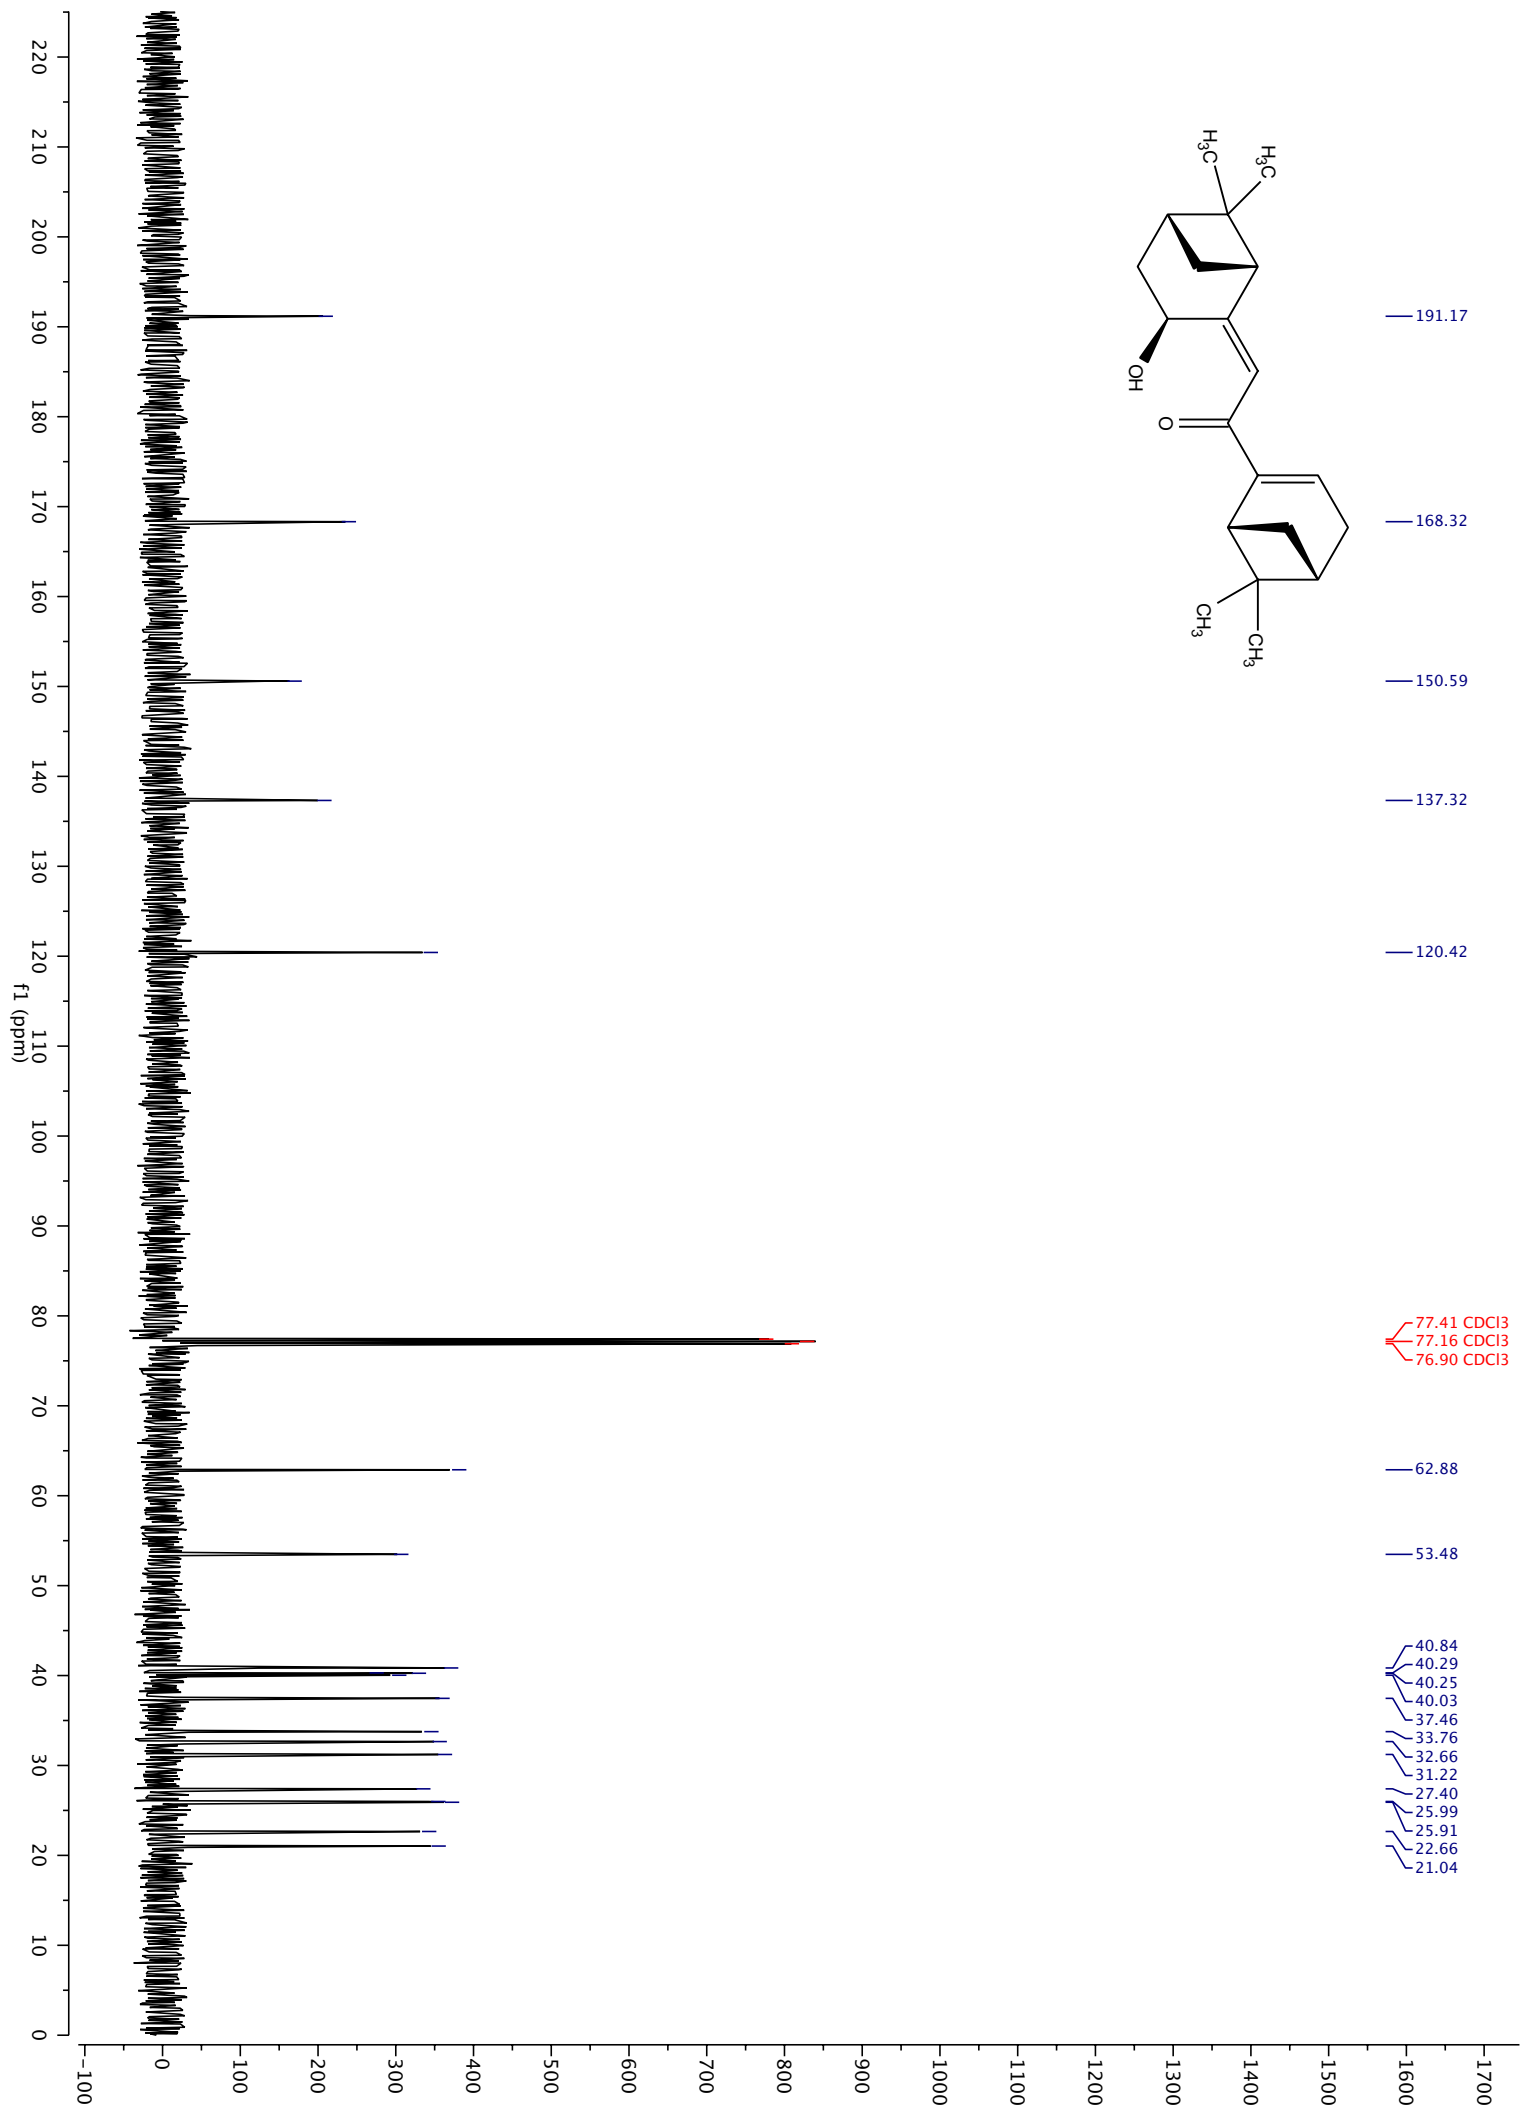

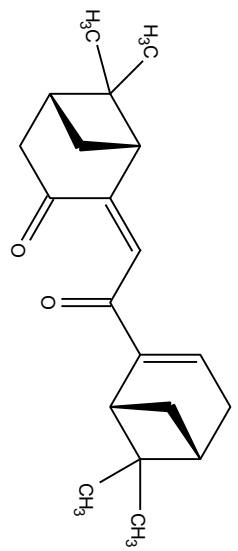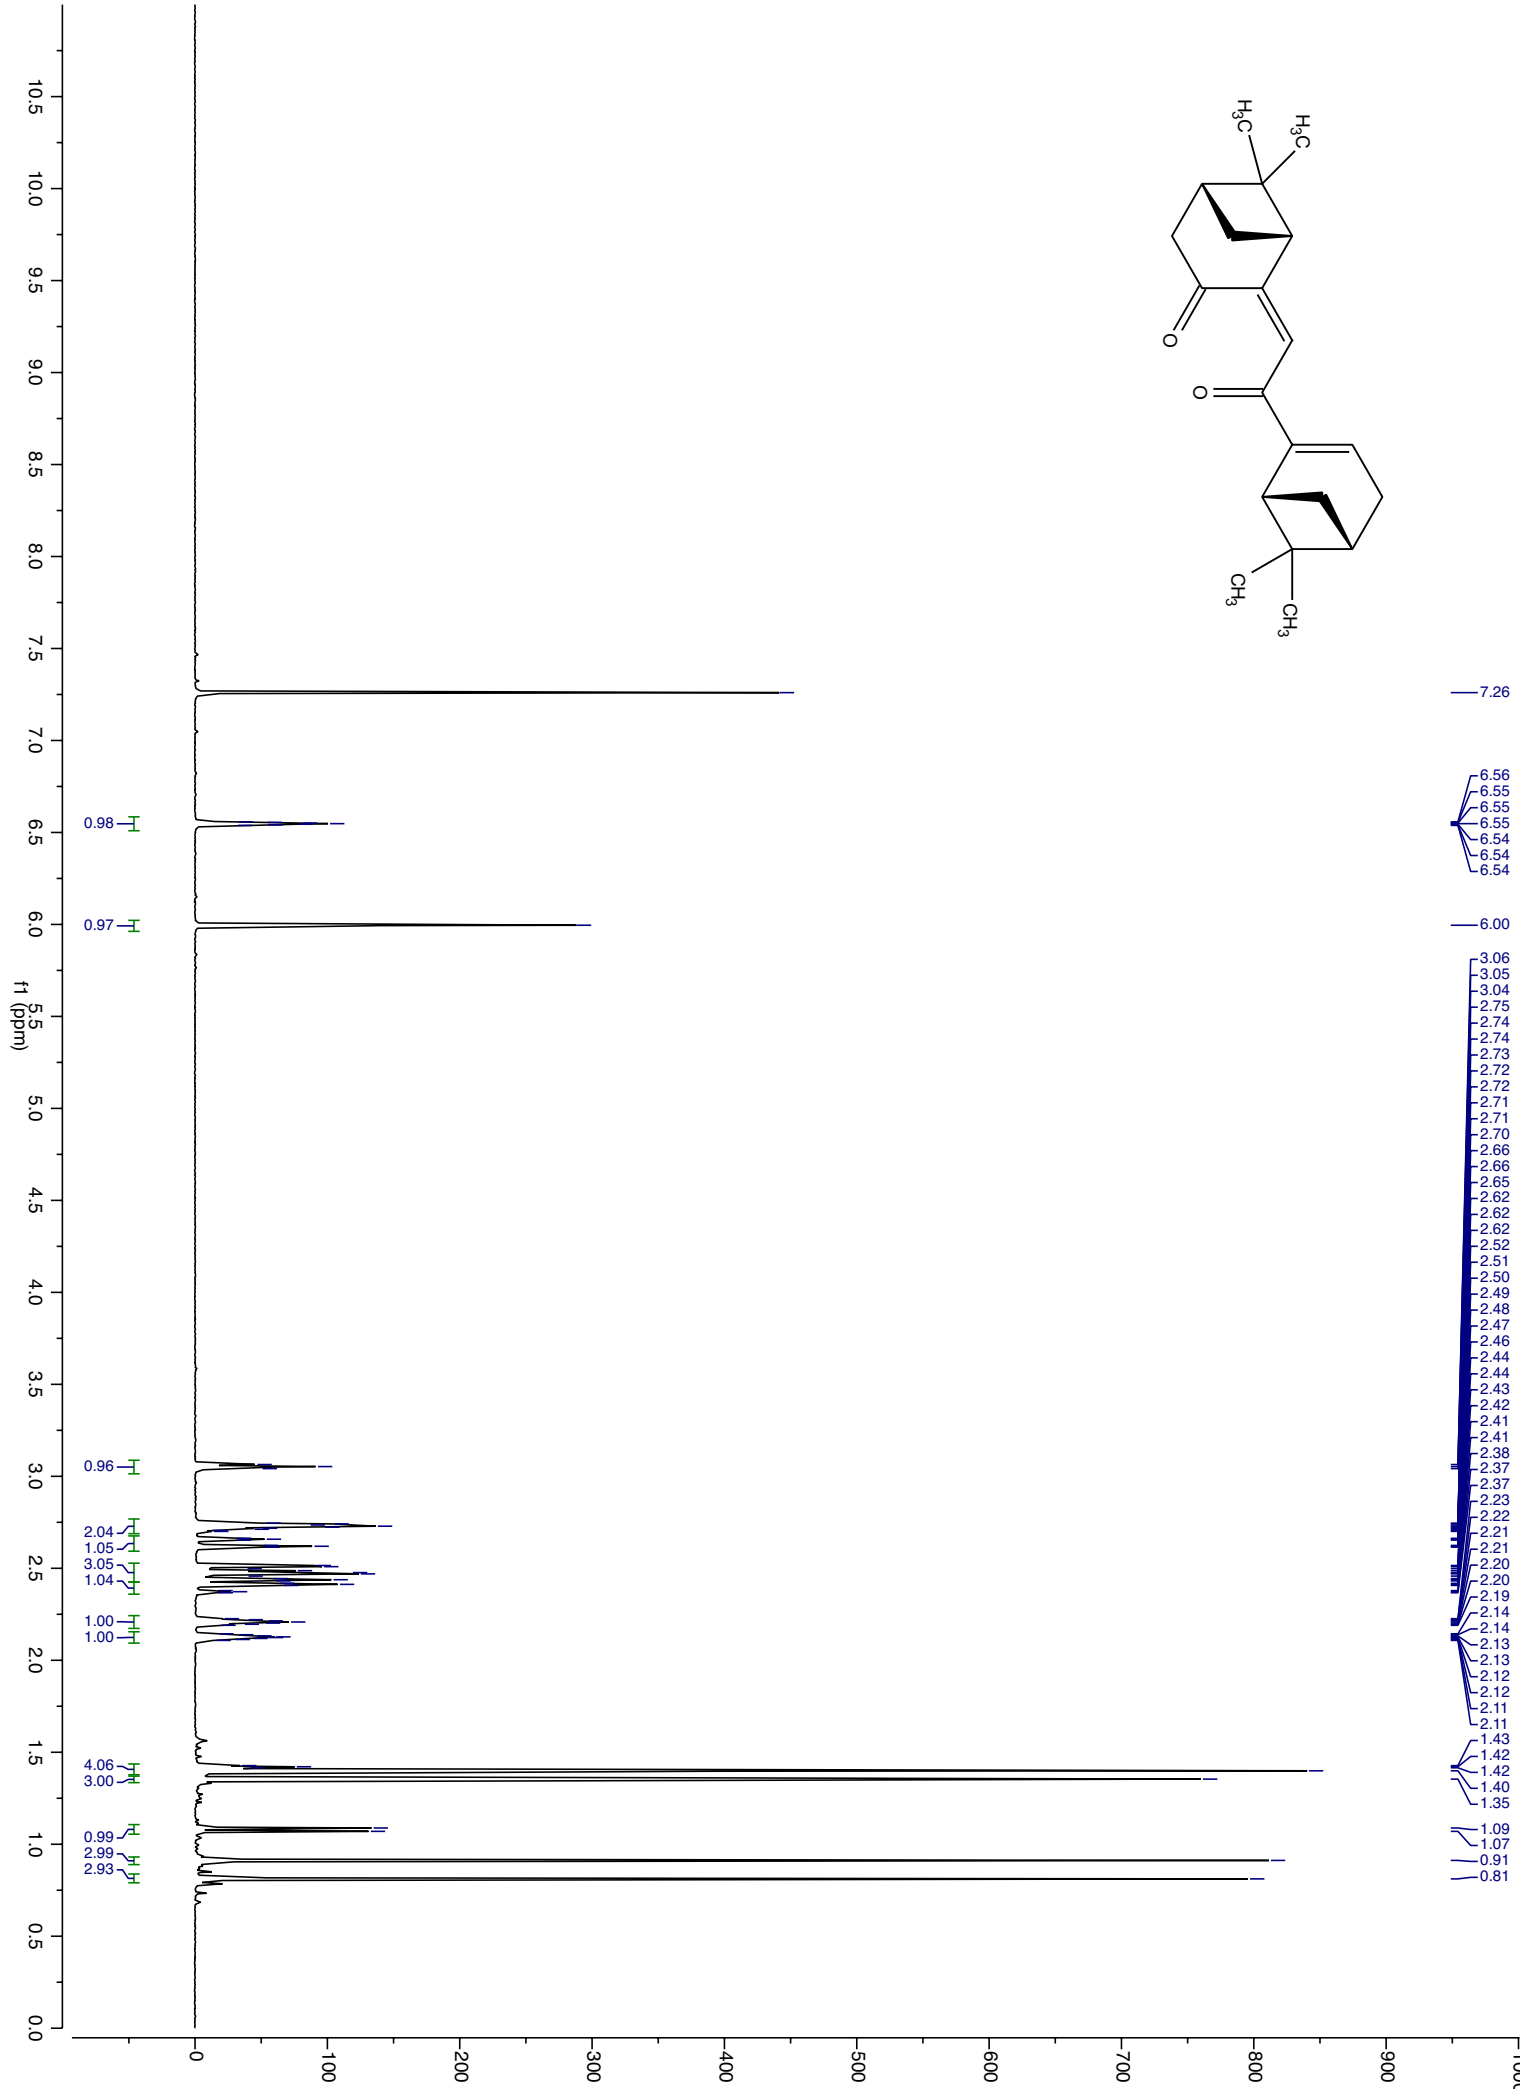

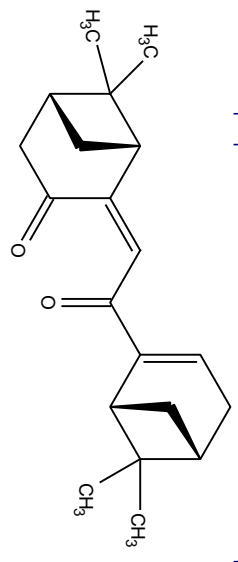

198.35  
195.00

149.66  
144.99  
138.18  
132.79

77.41 CDCl<sub>3</sub>  
77.16 CDCl<sub>3</sub>  
76.90 CDCl<sub>3</sub>

48.93  
42.55  
41.31  
40.75  
39.28  
38.37  
37.92  
32.65  
32.29  
31.19  
26.06  
22.09  
21.07

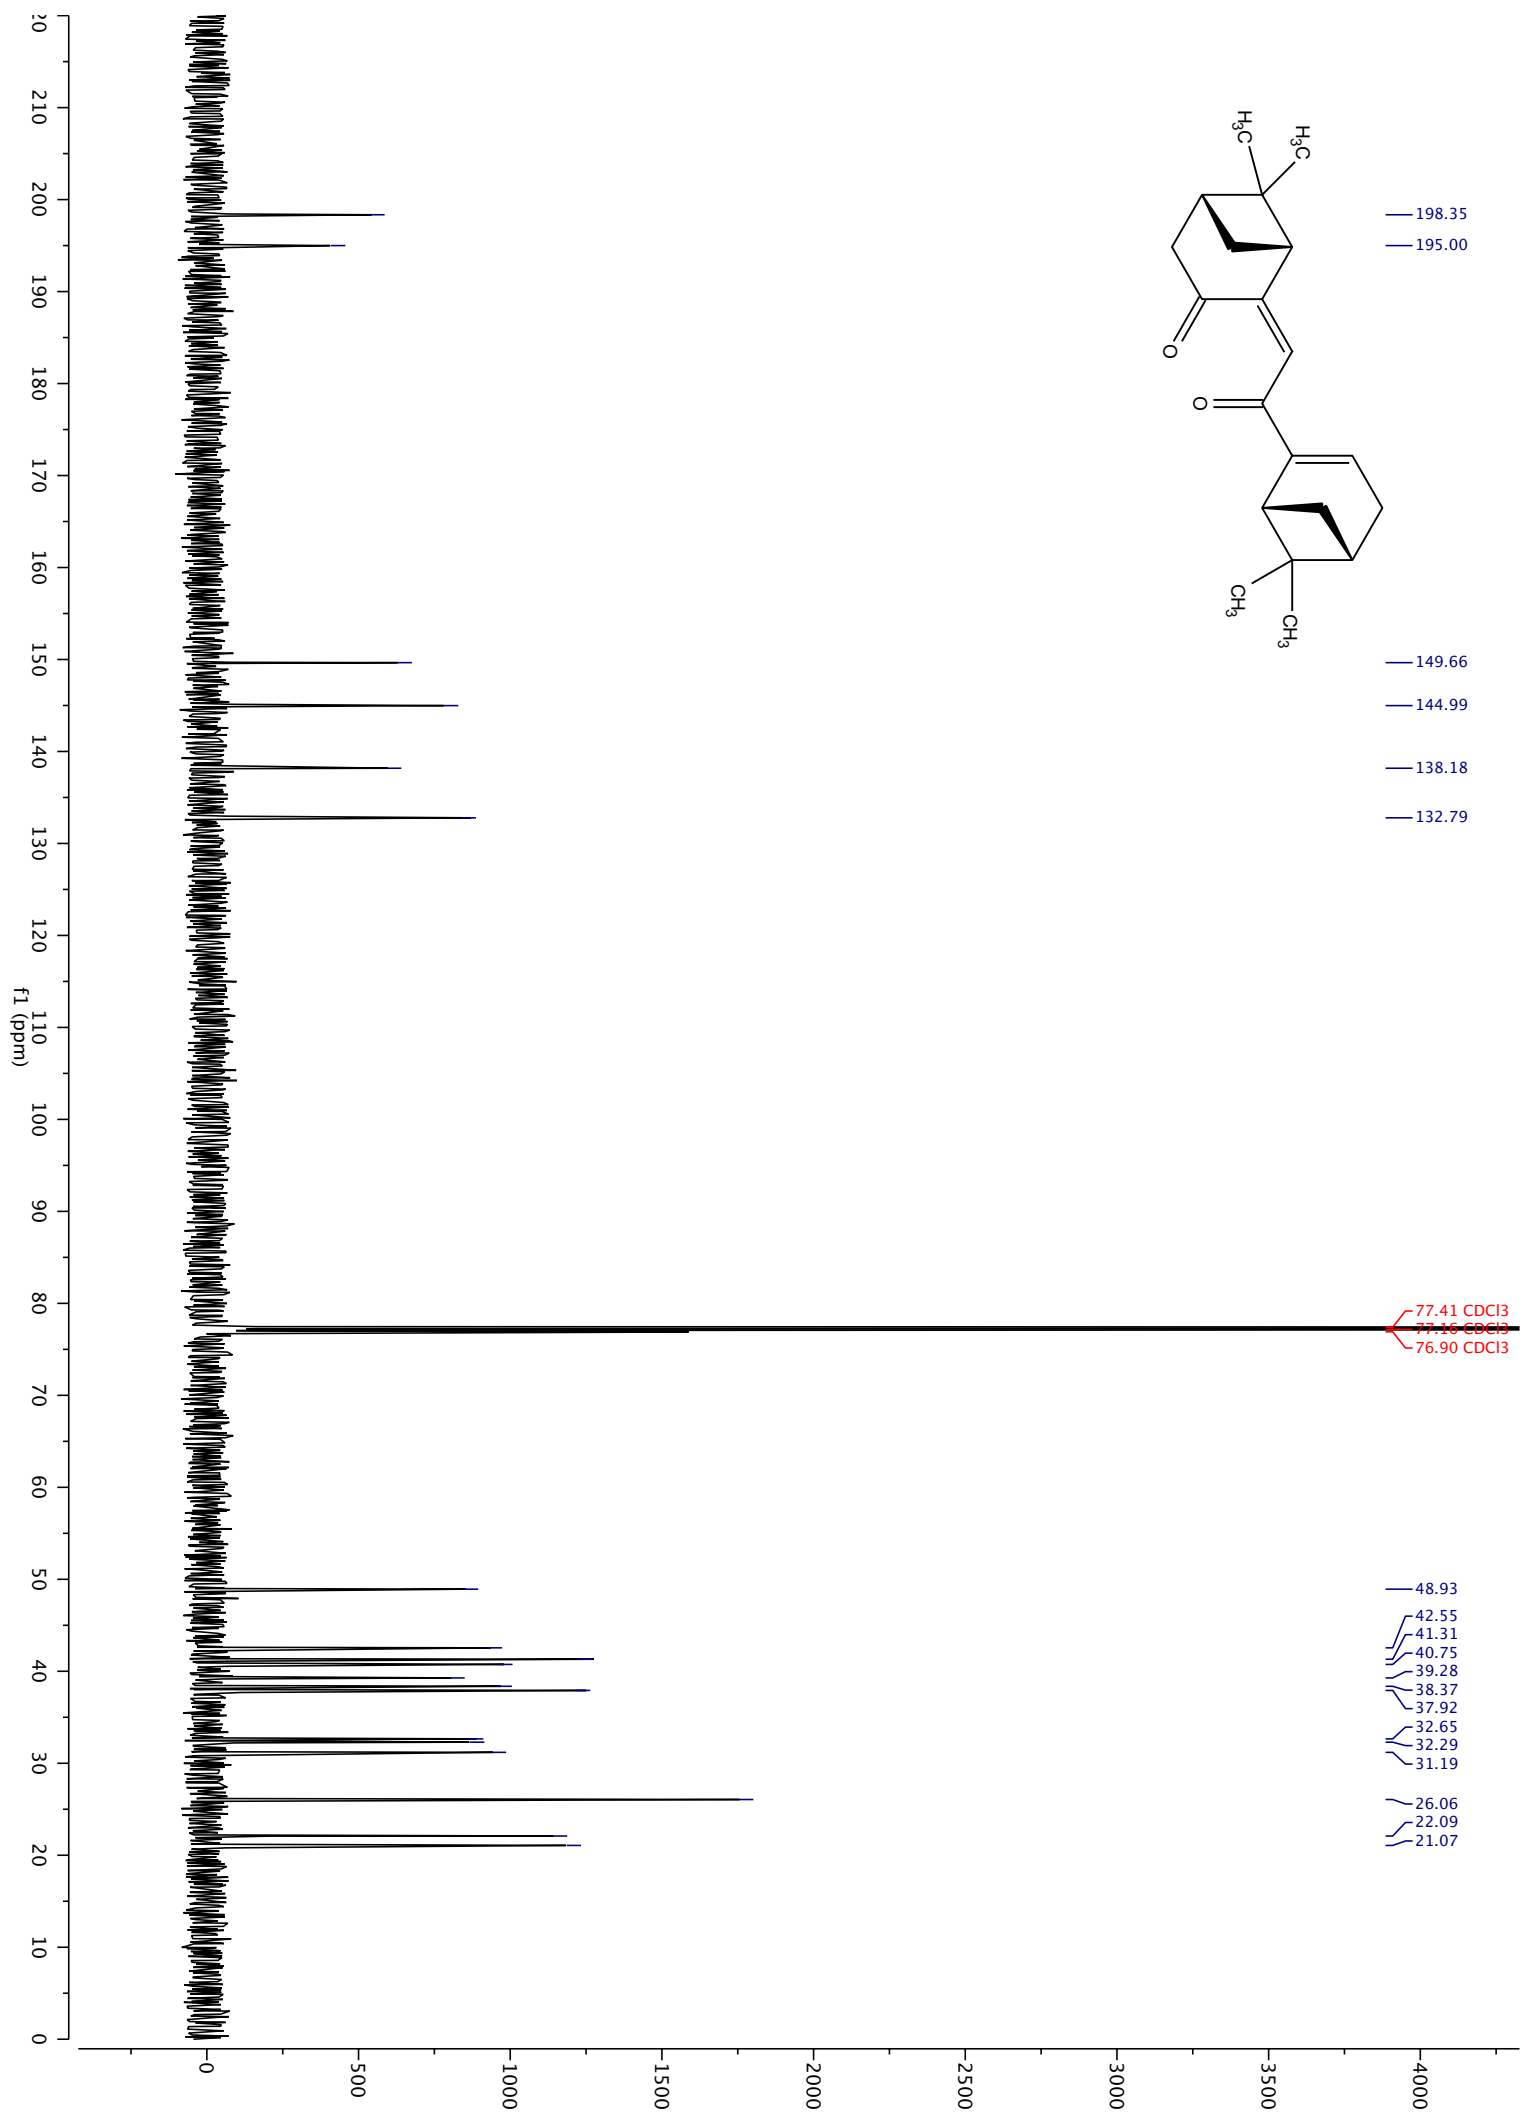



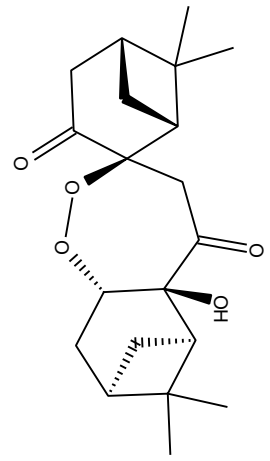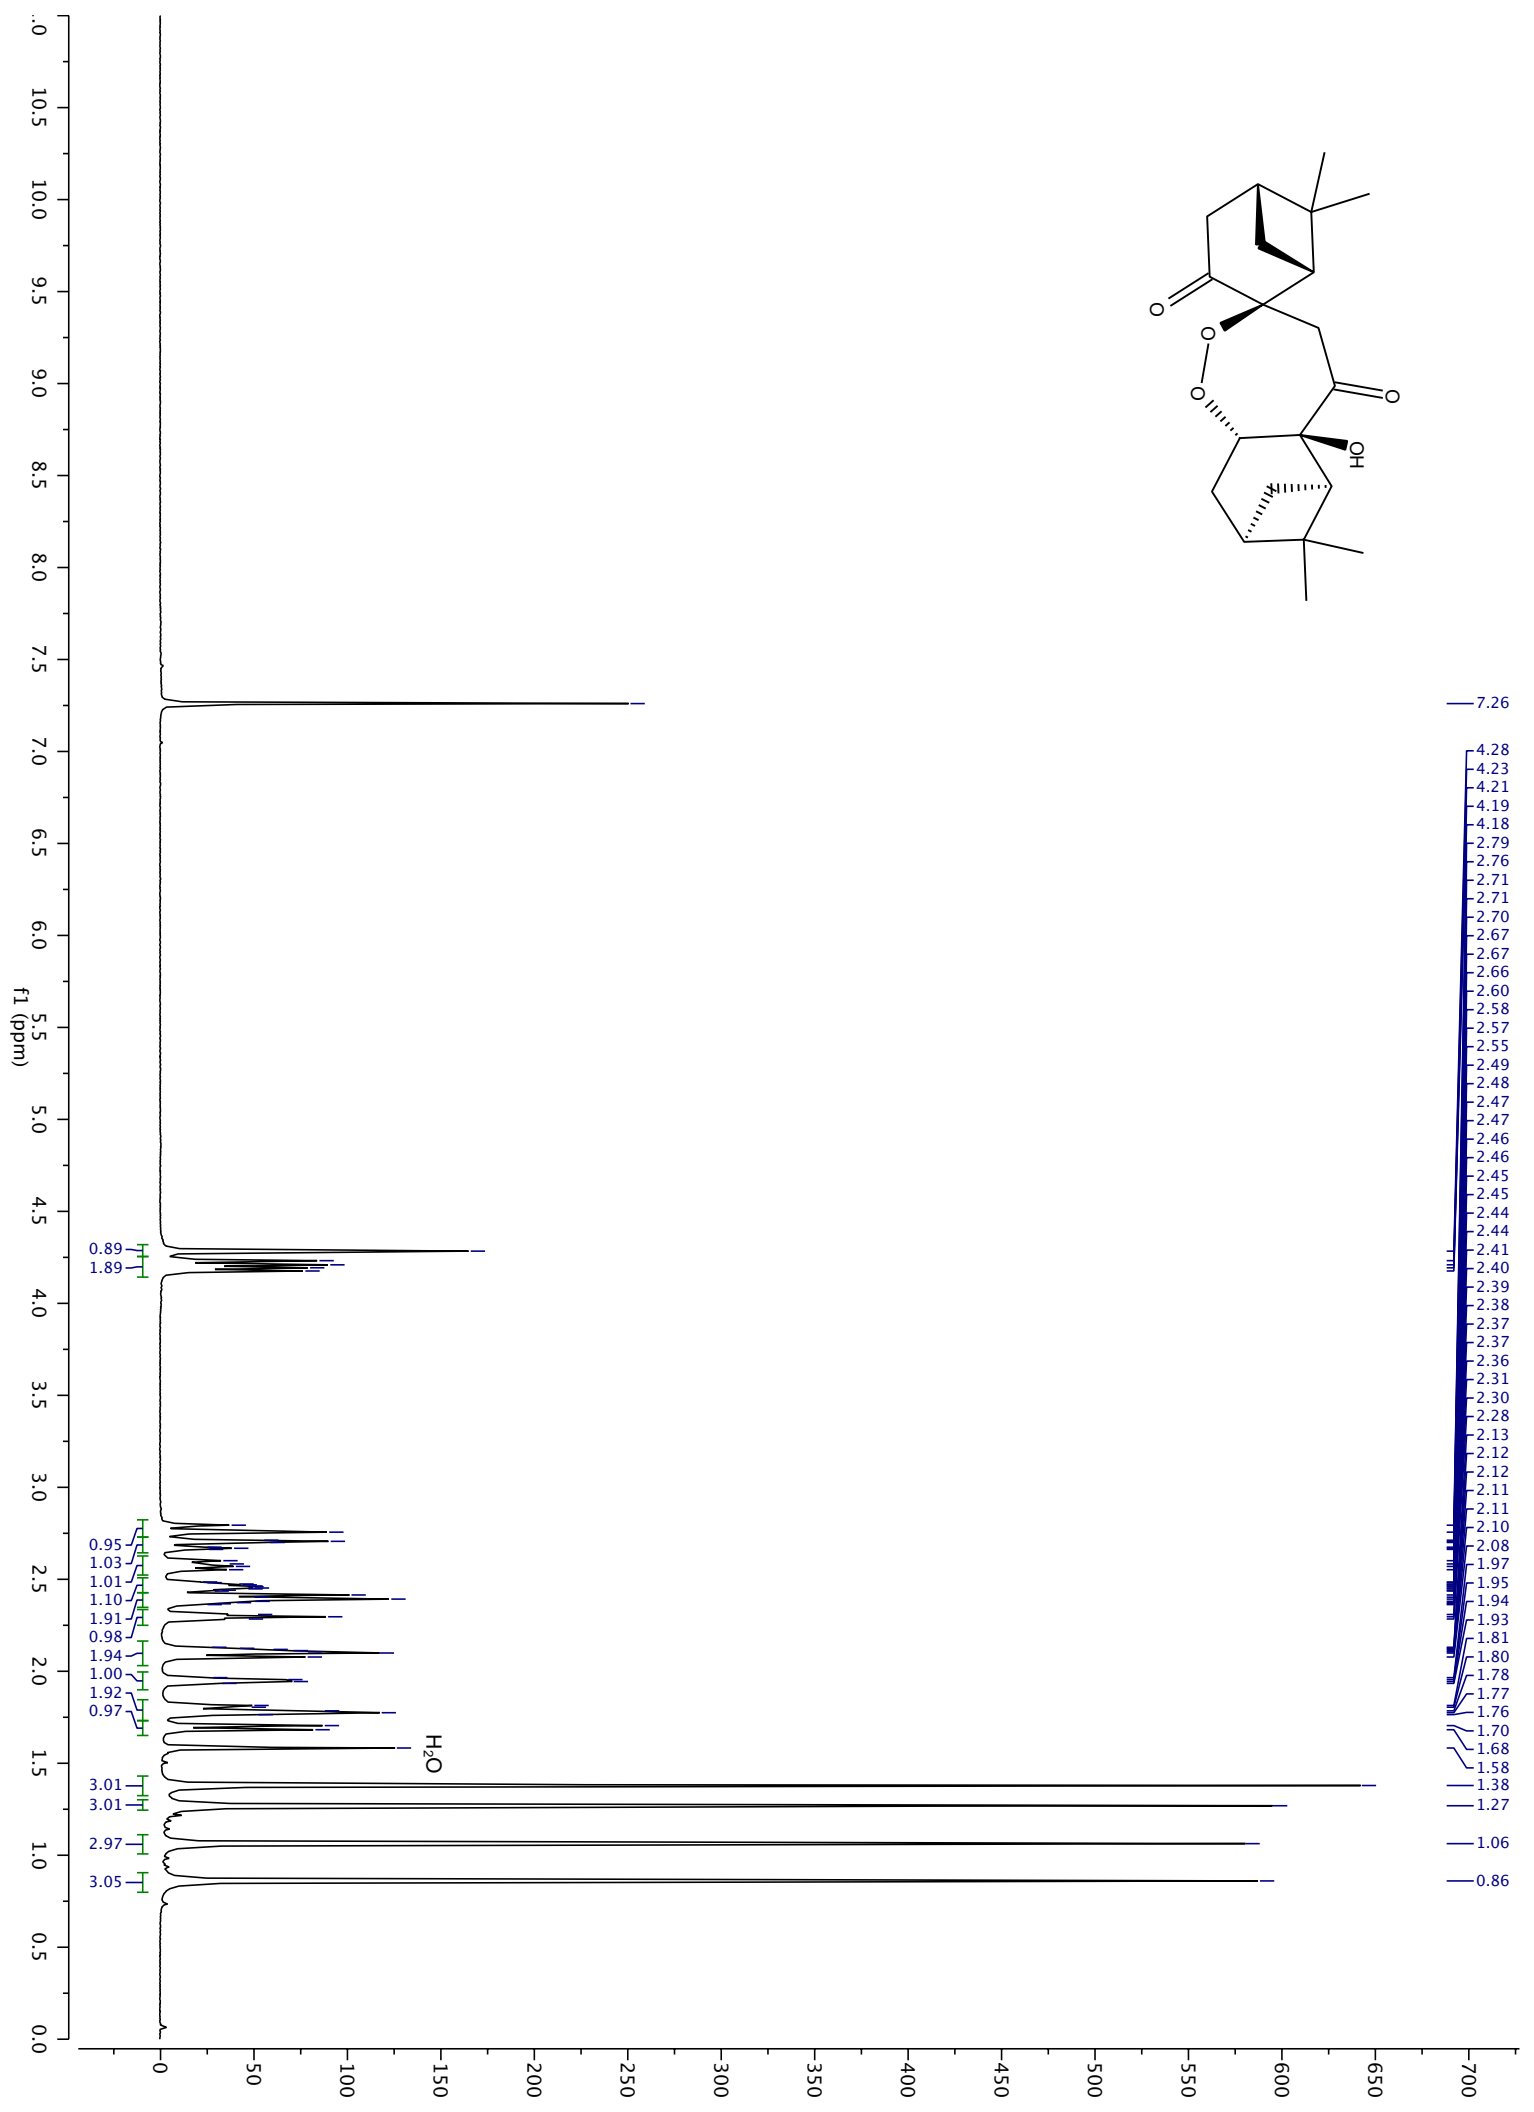

SI-17

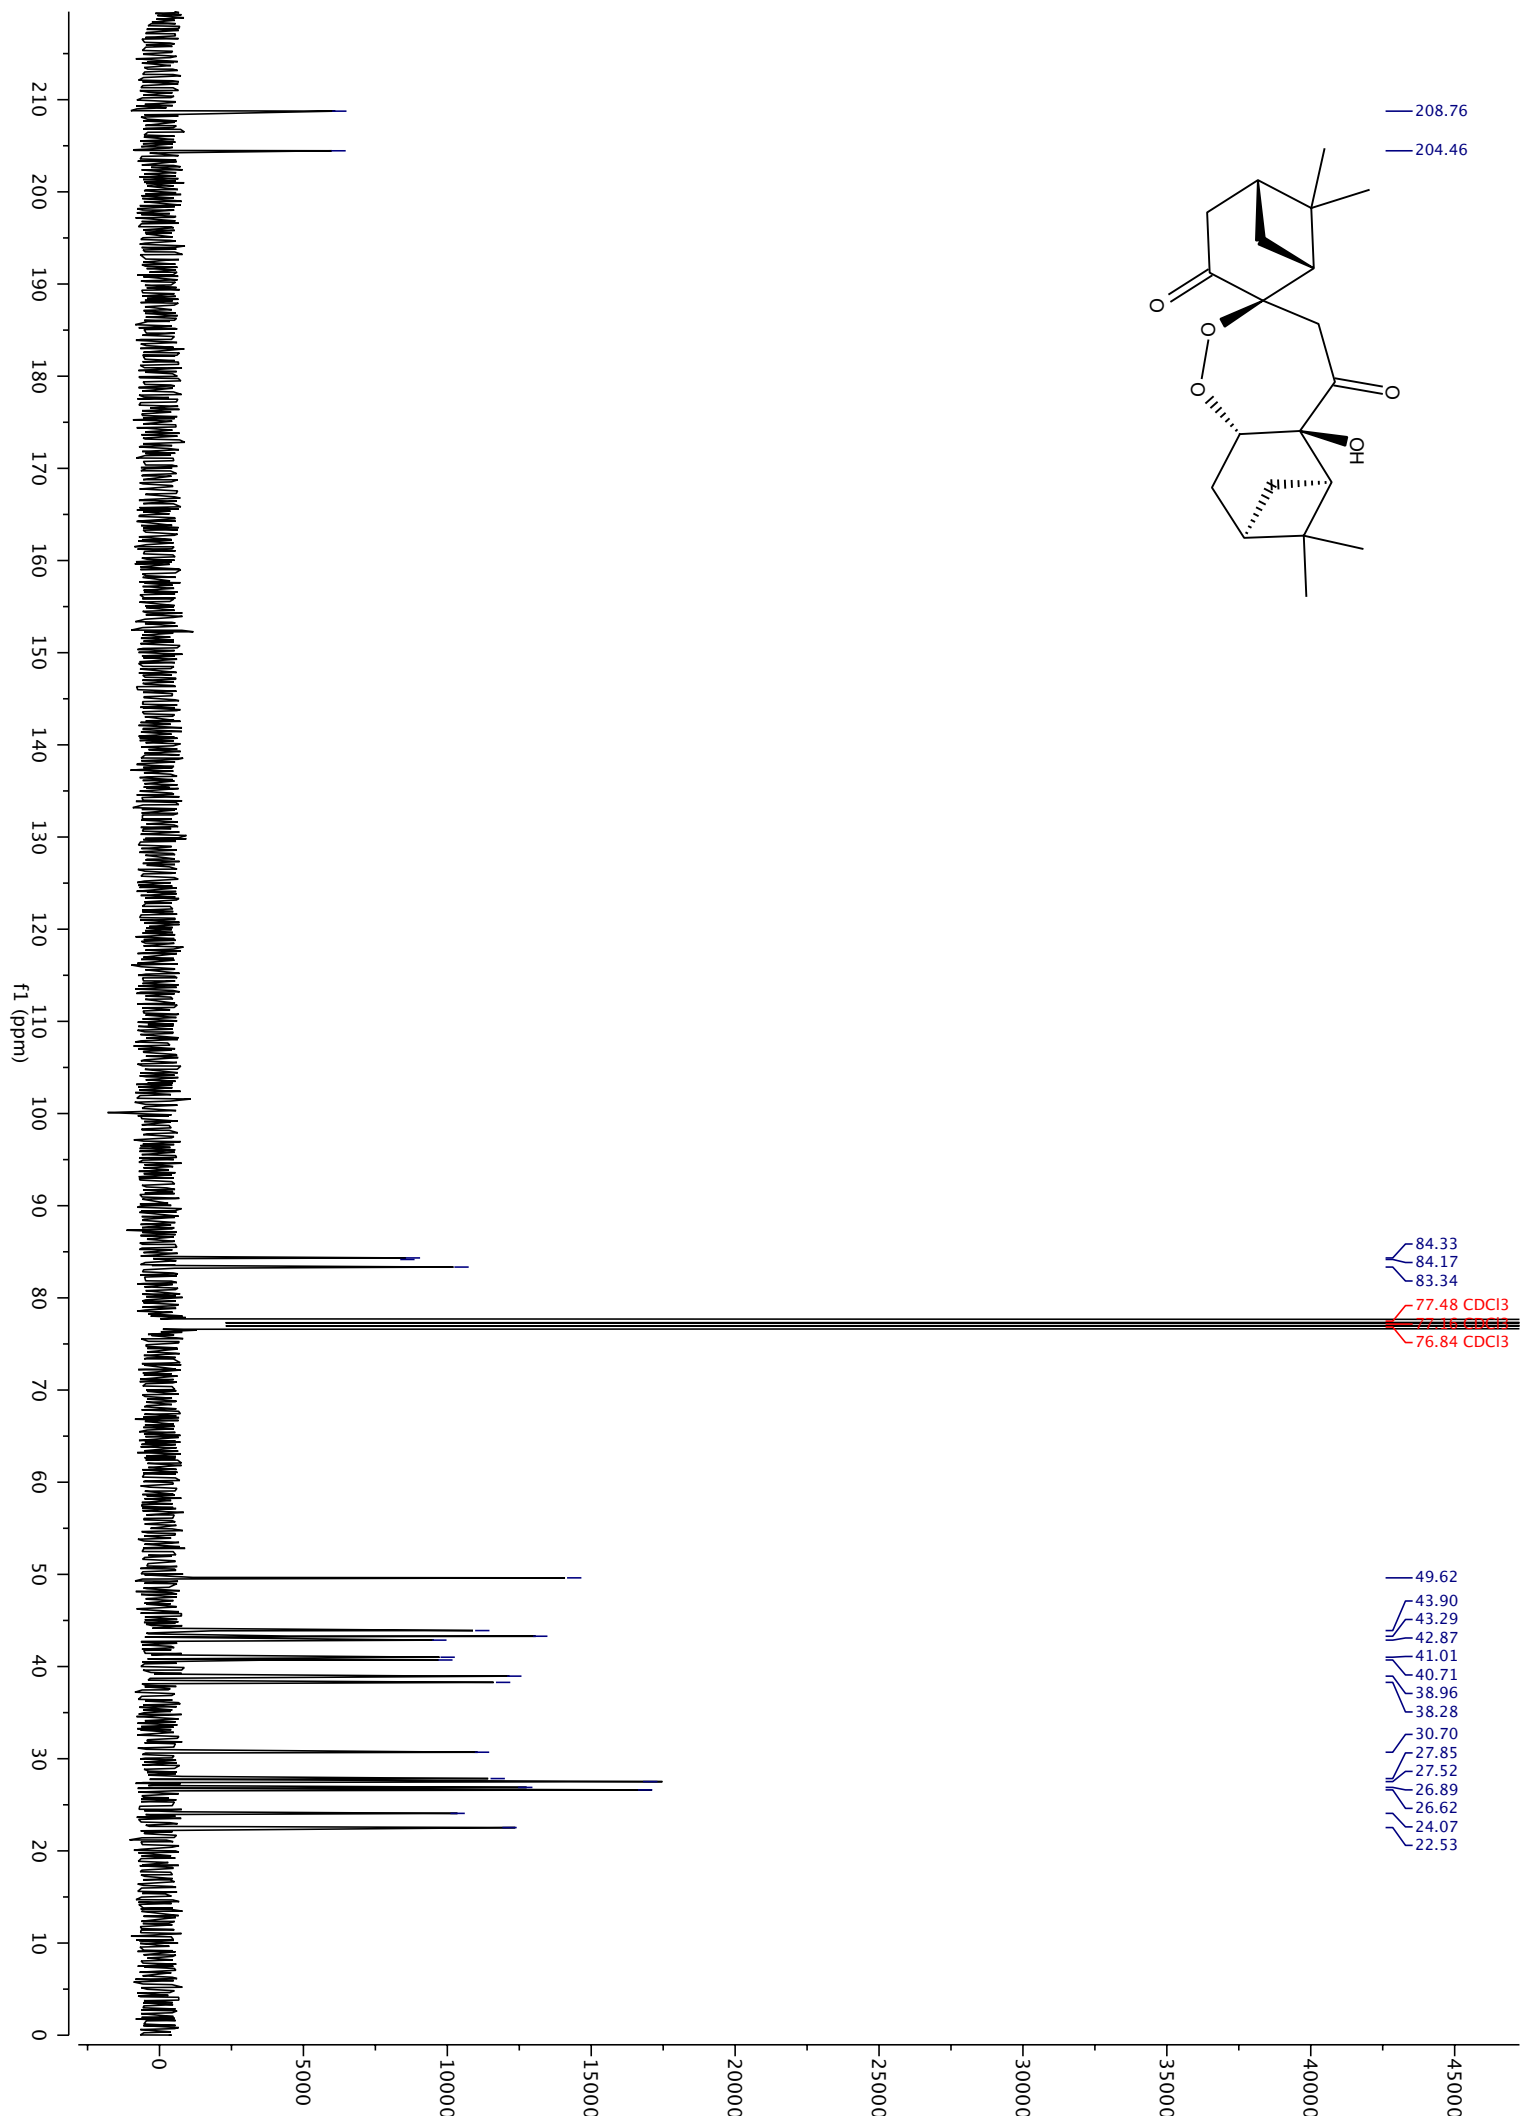

SI-18

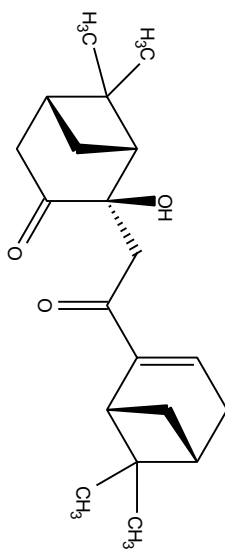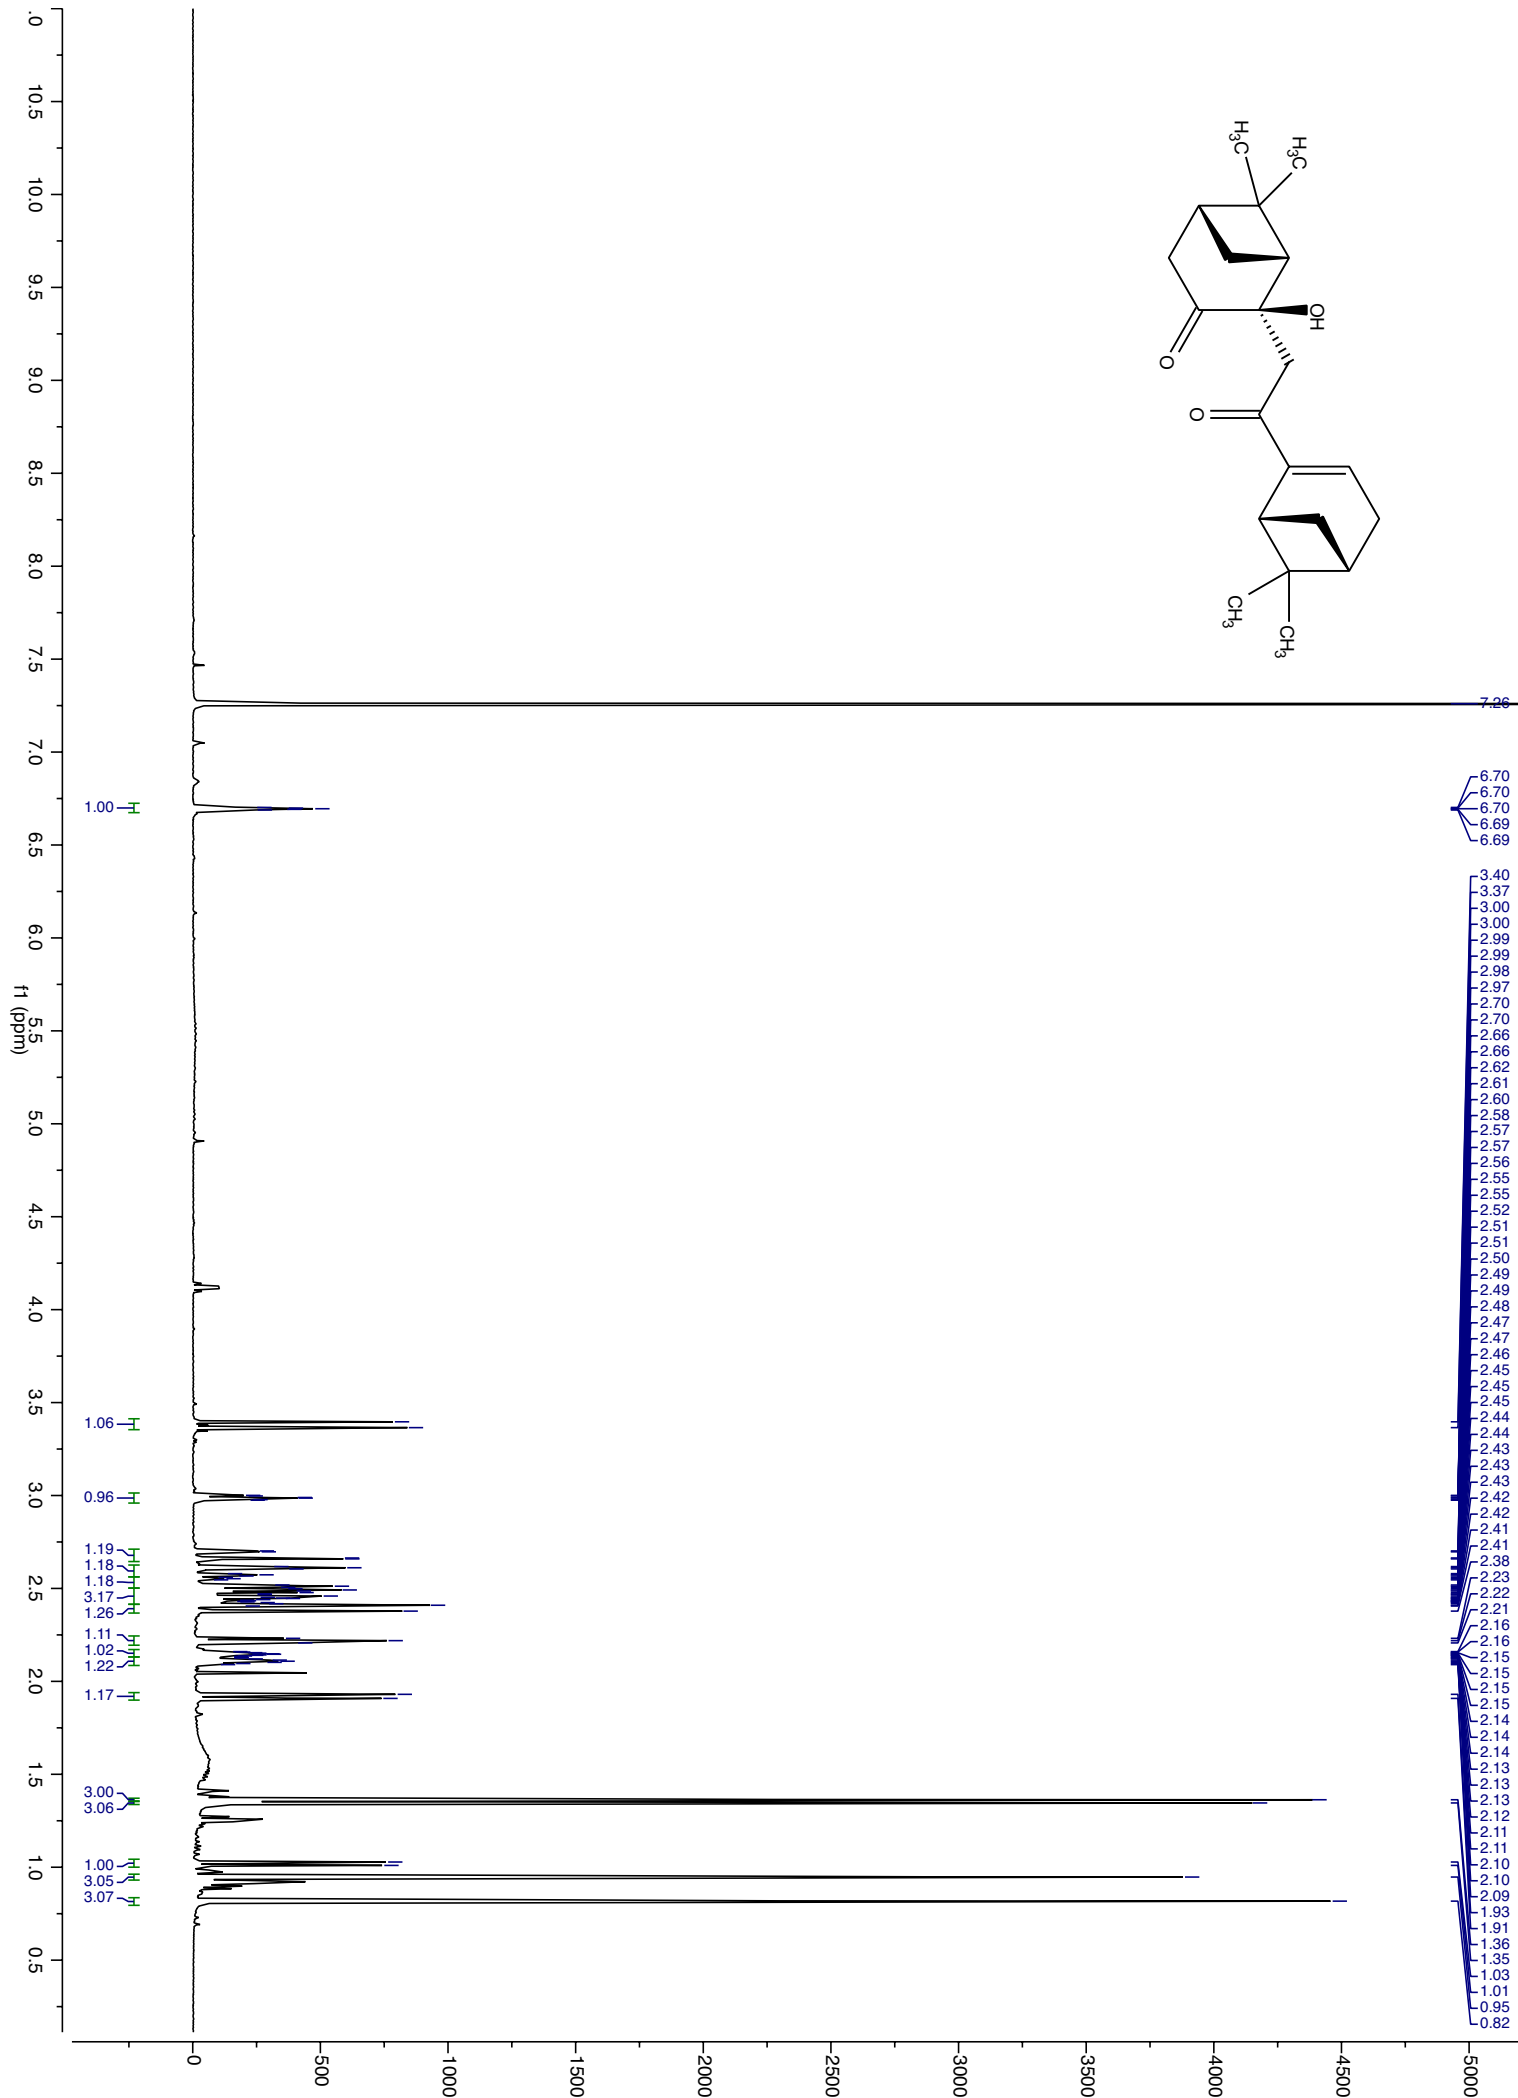

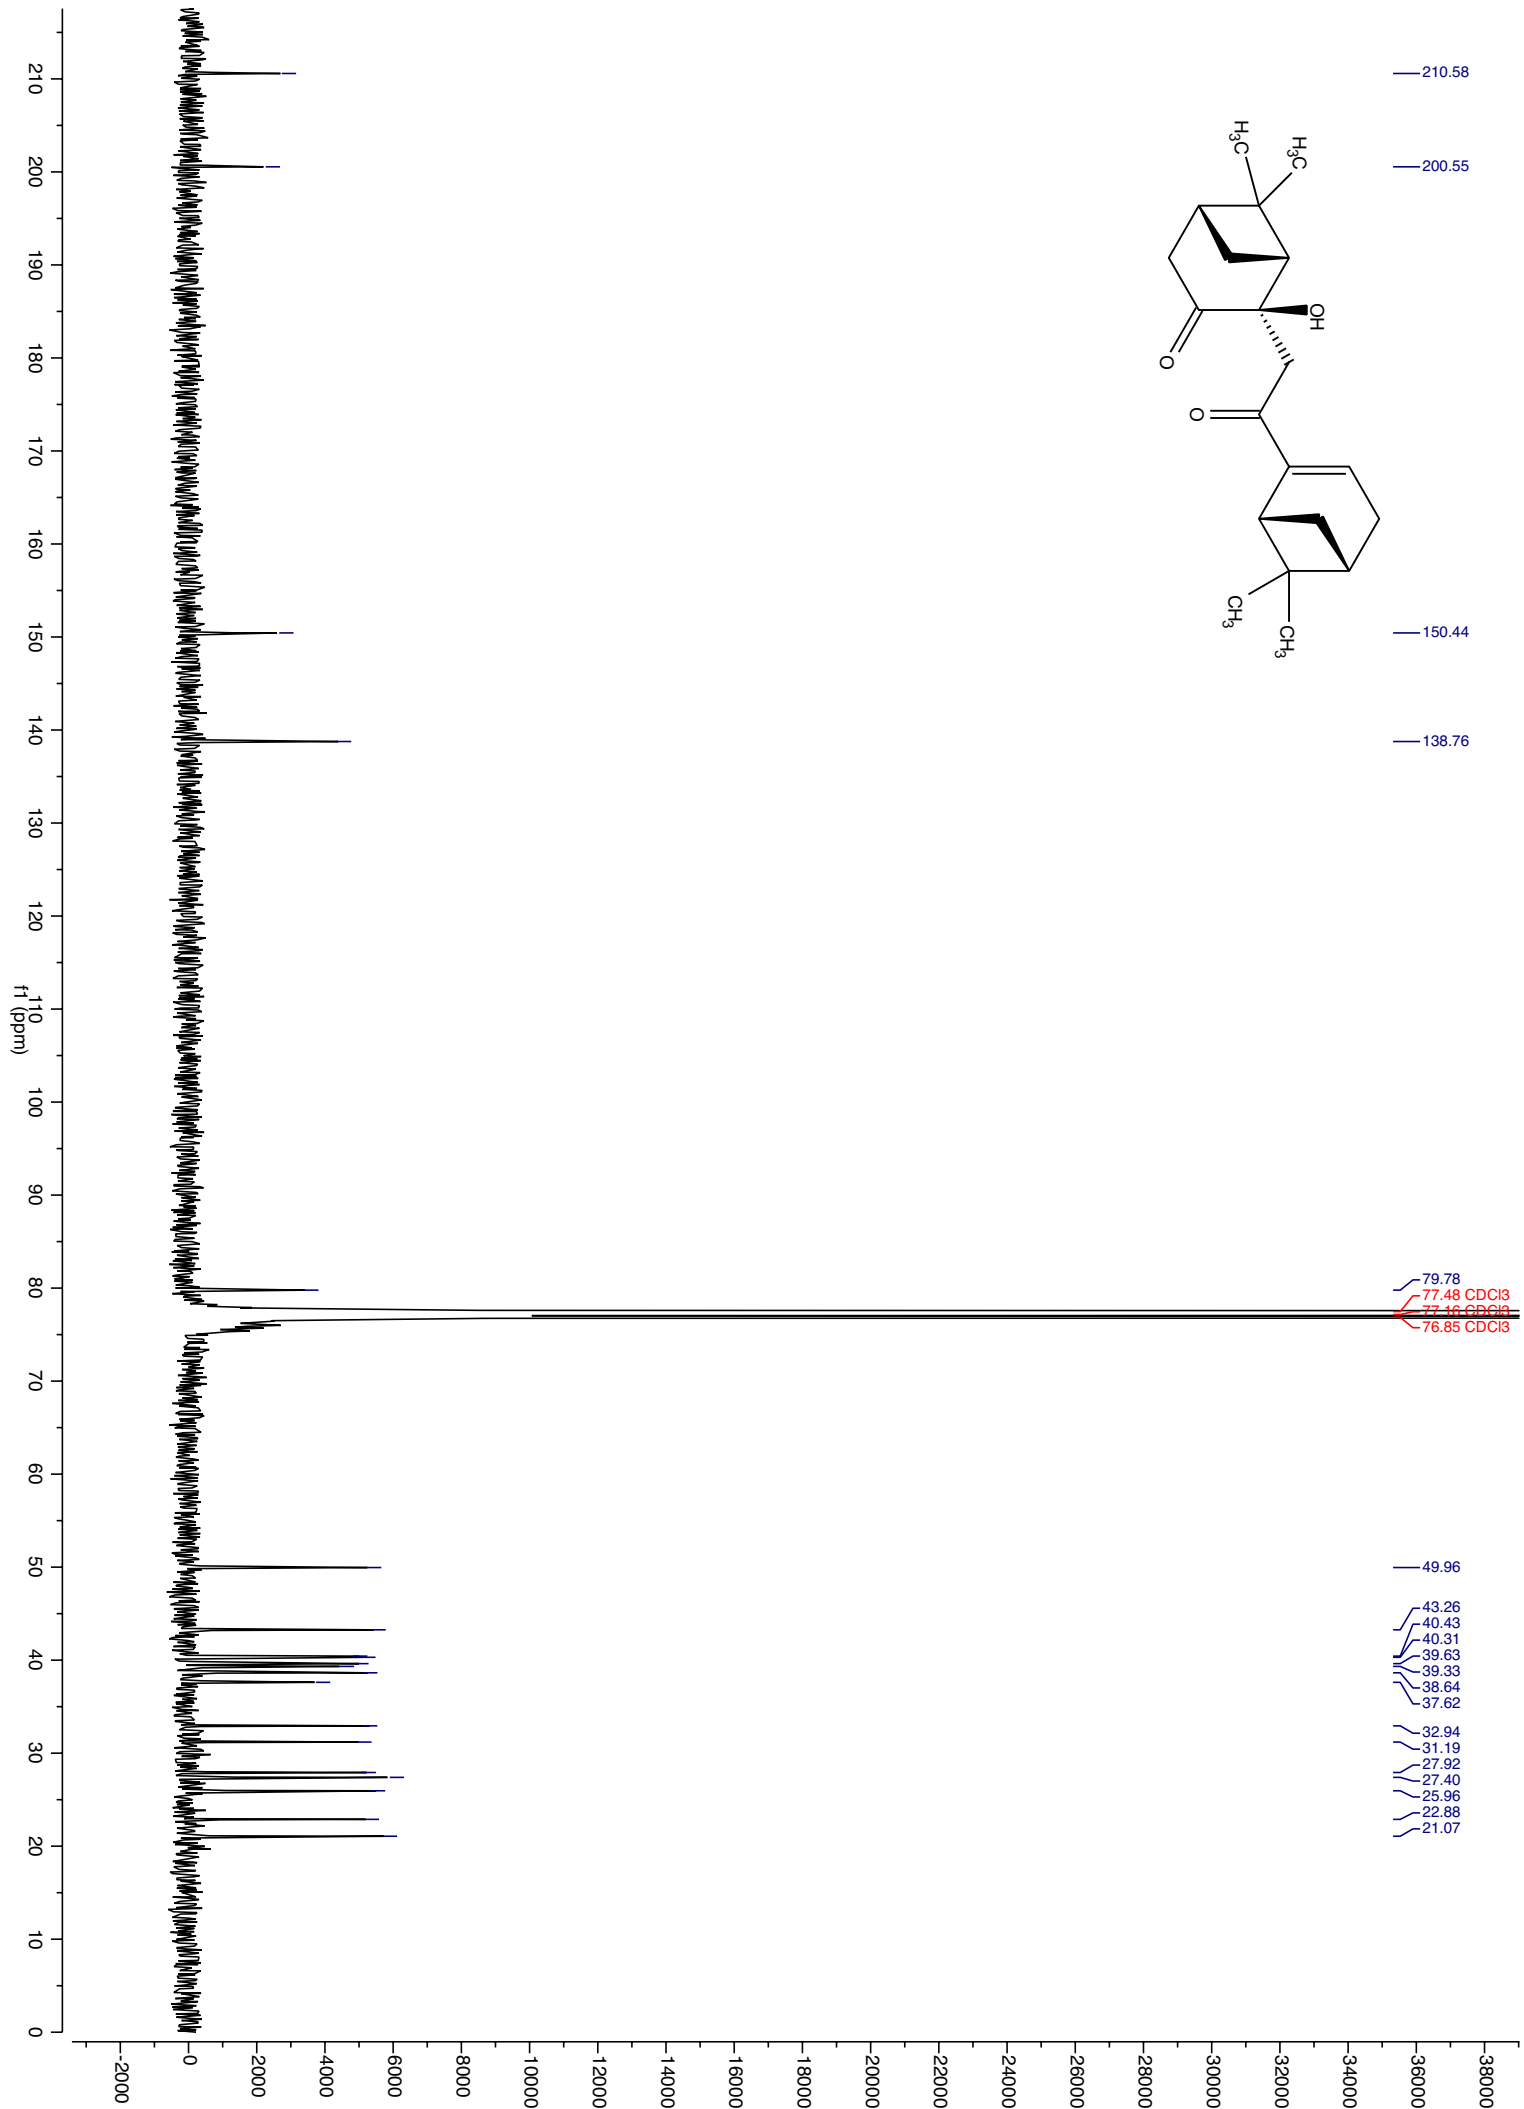

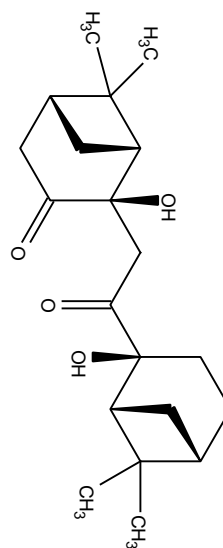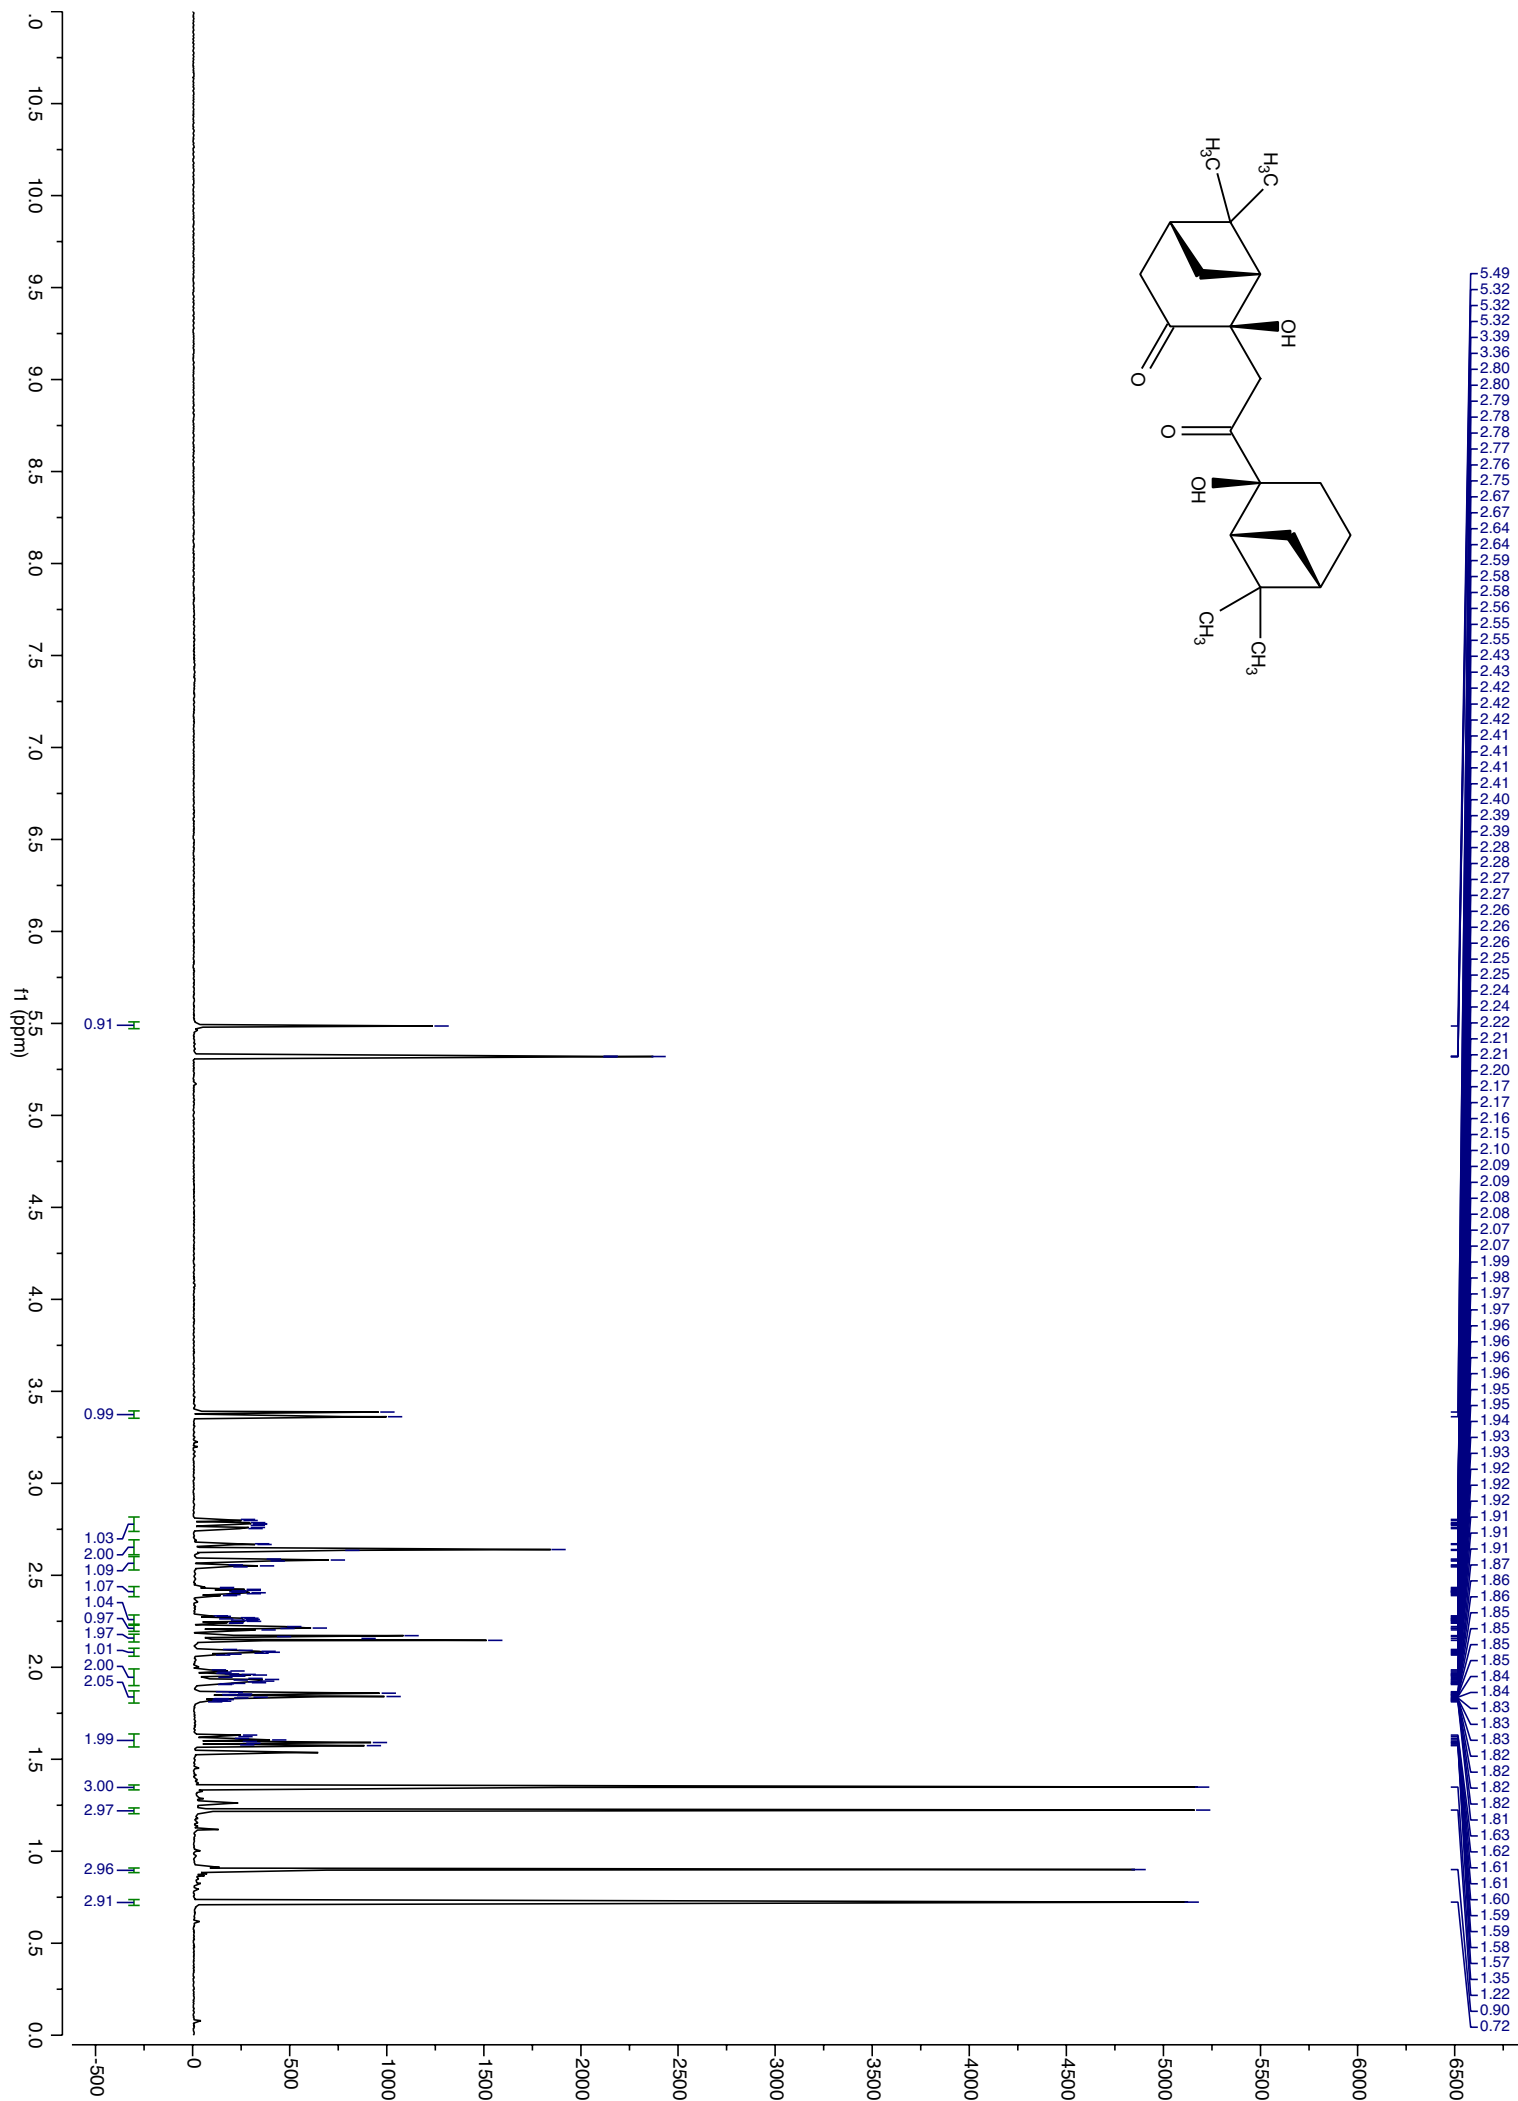

213.19  
213.12

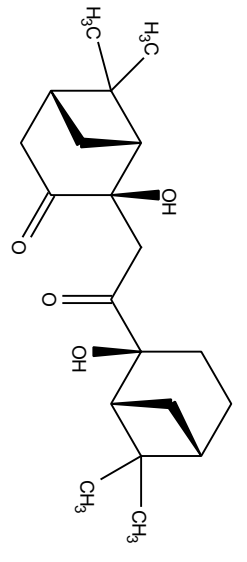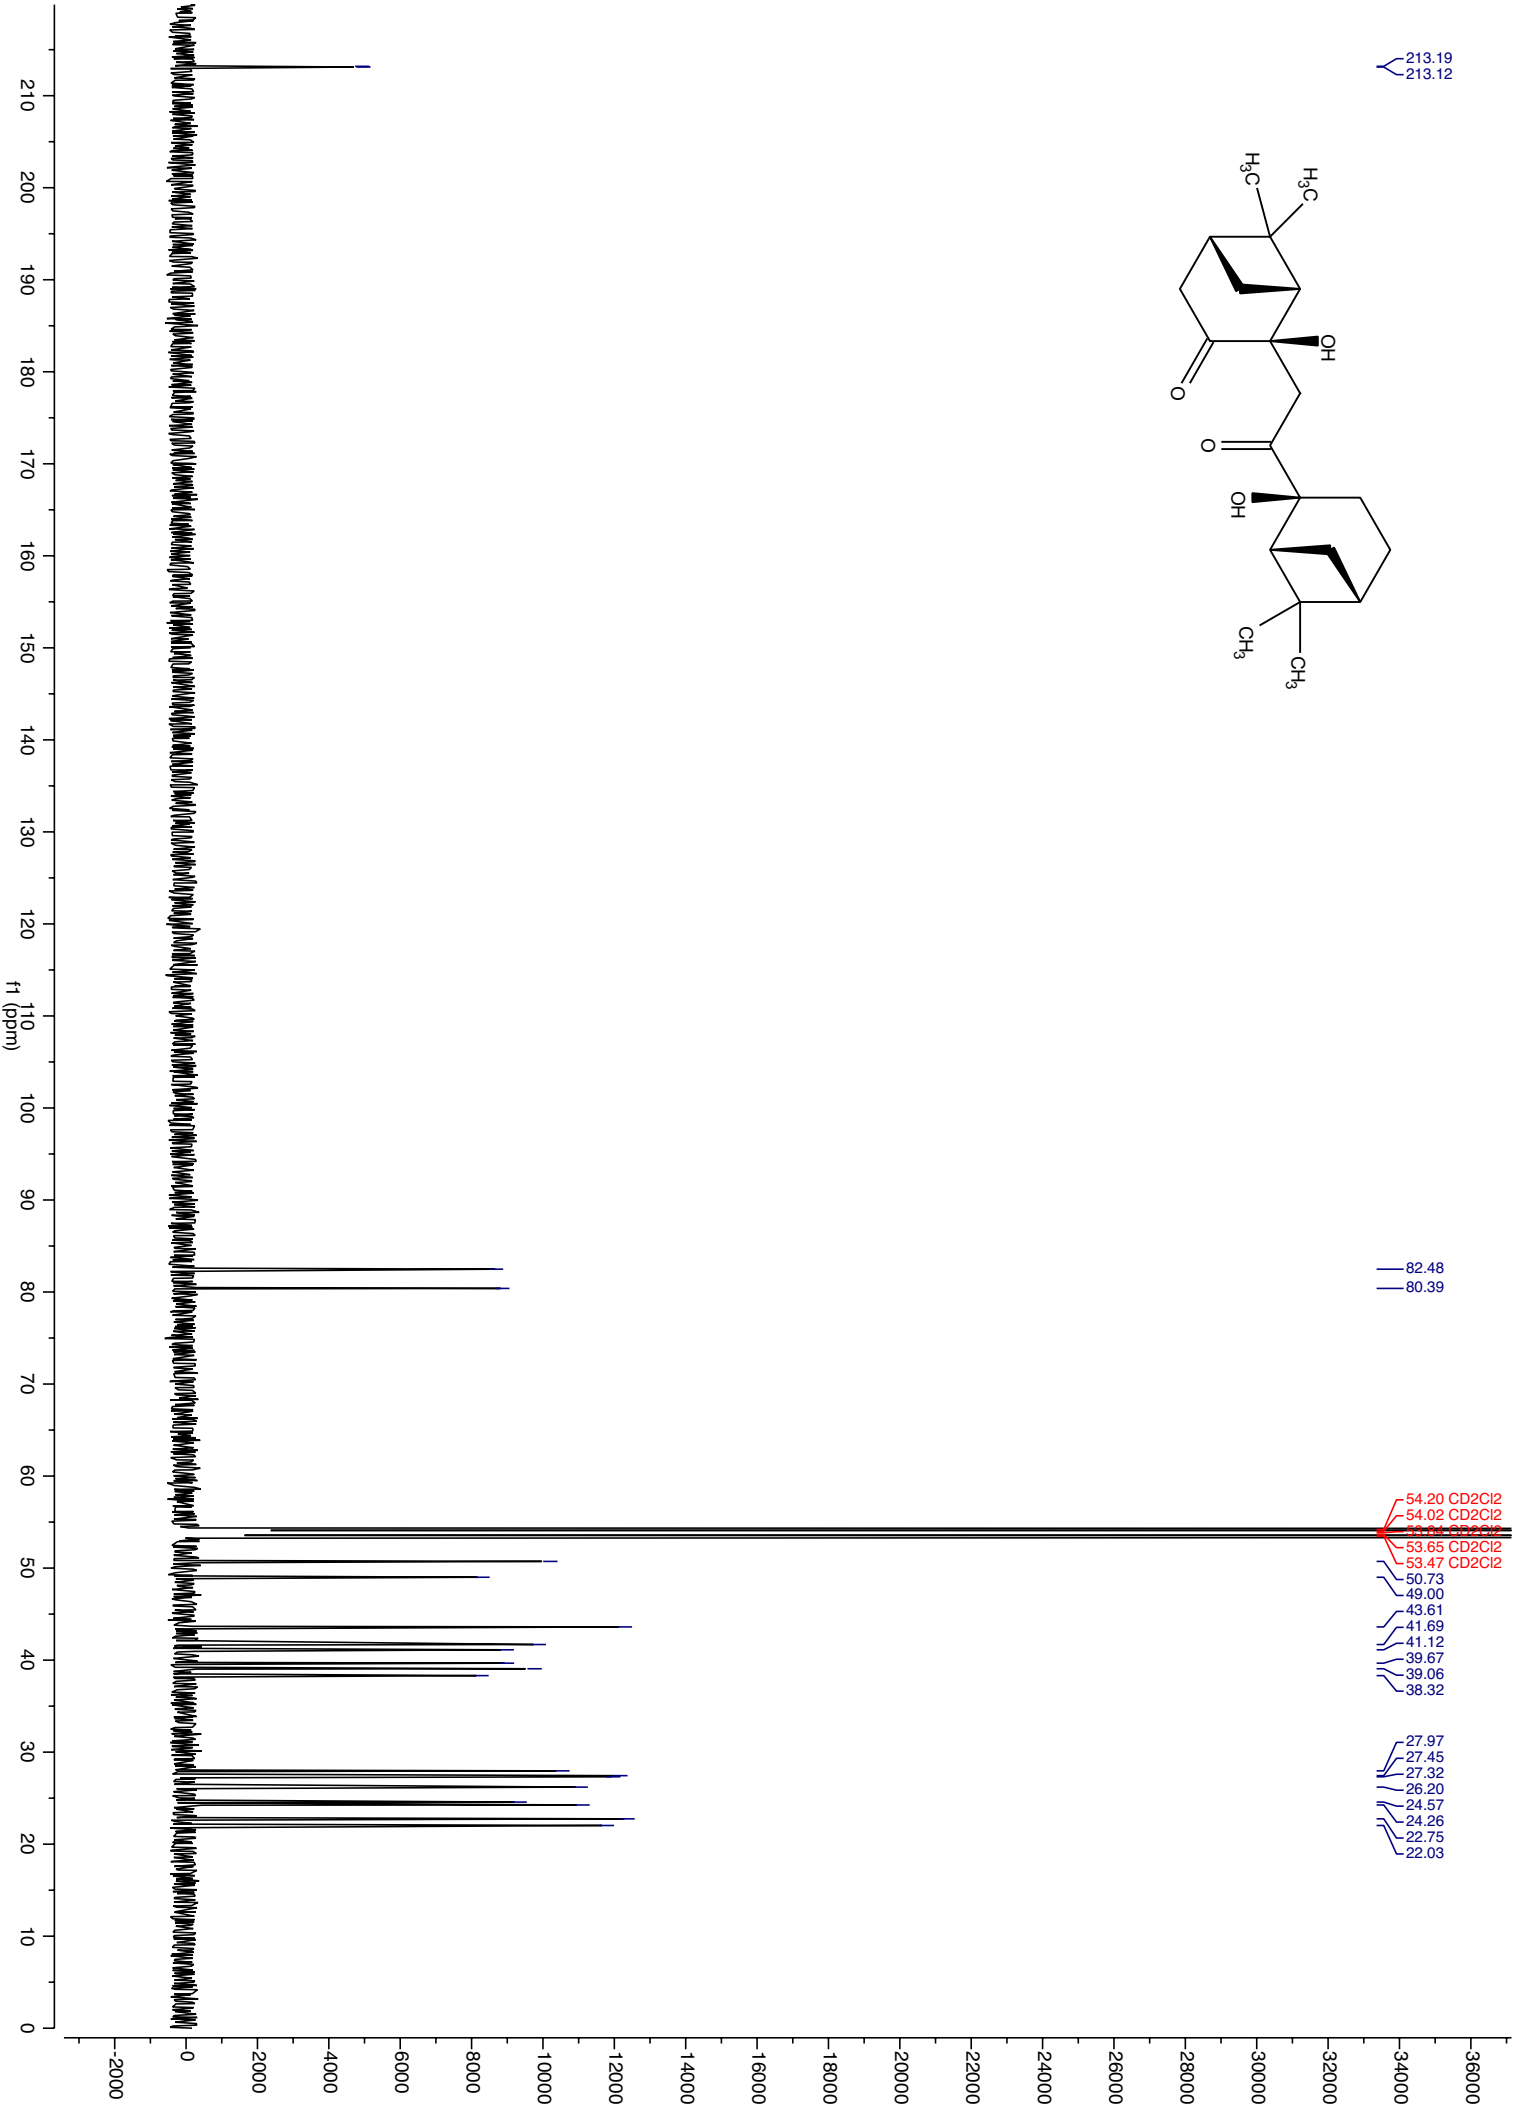

SI-22

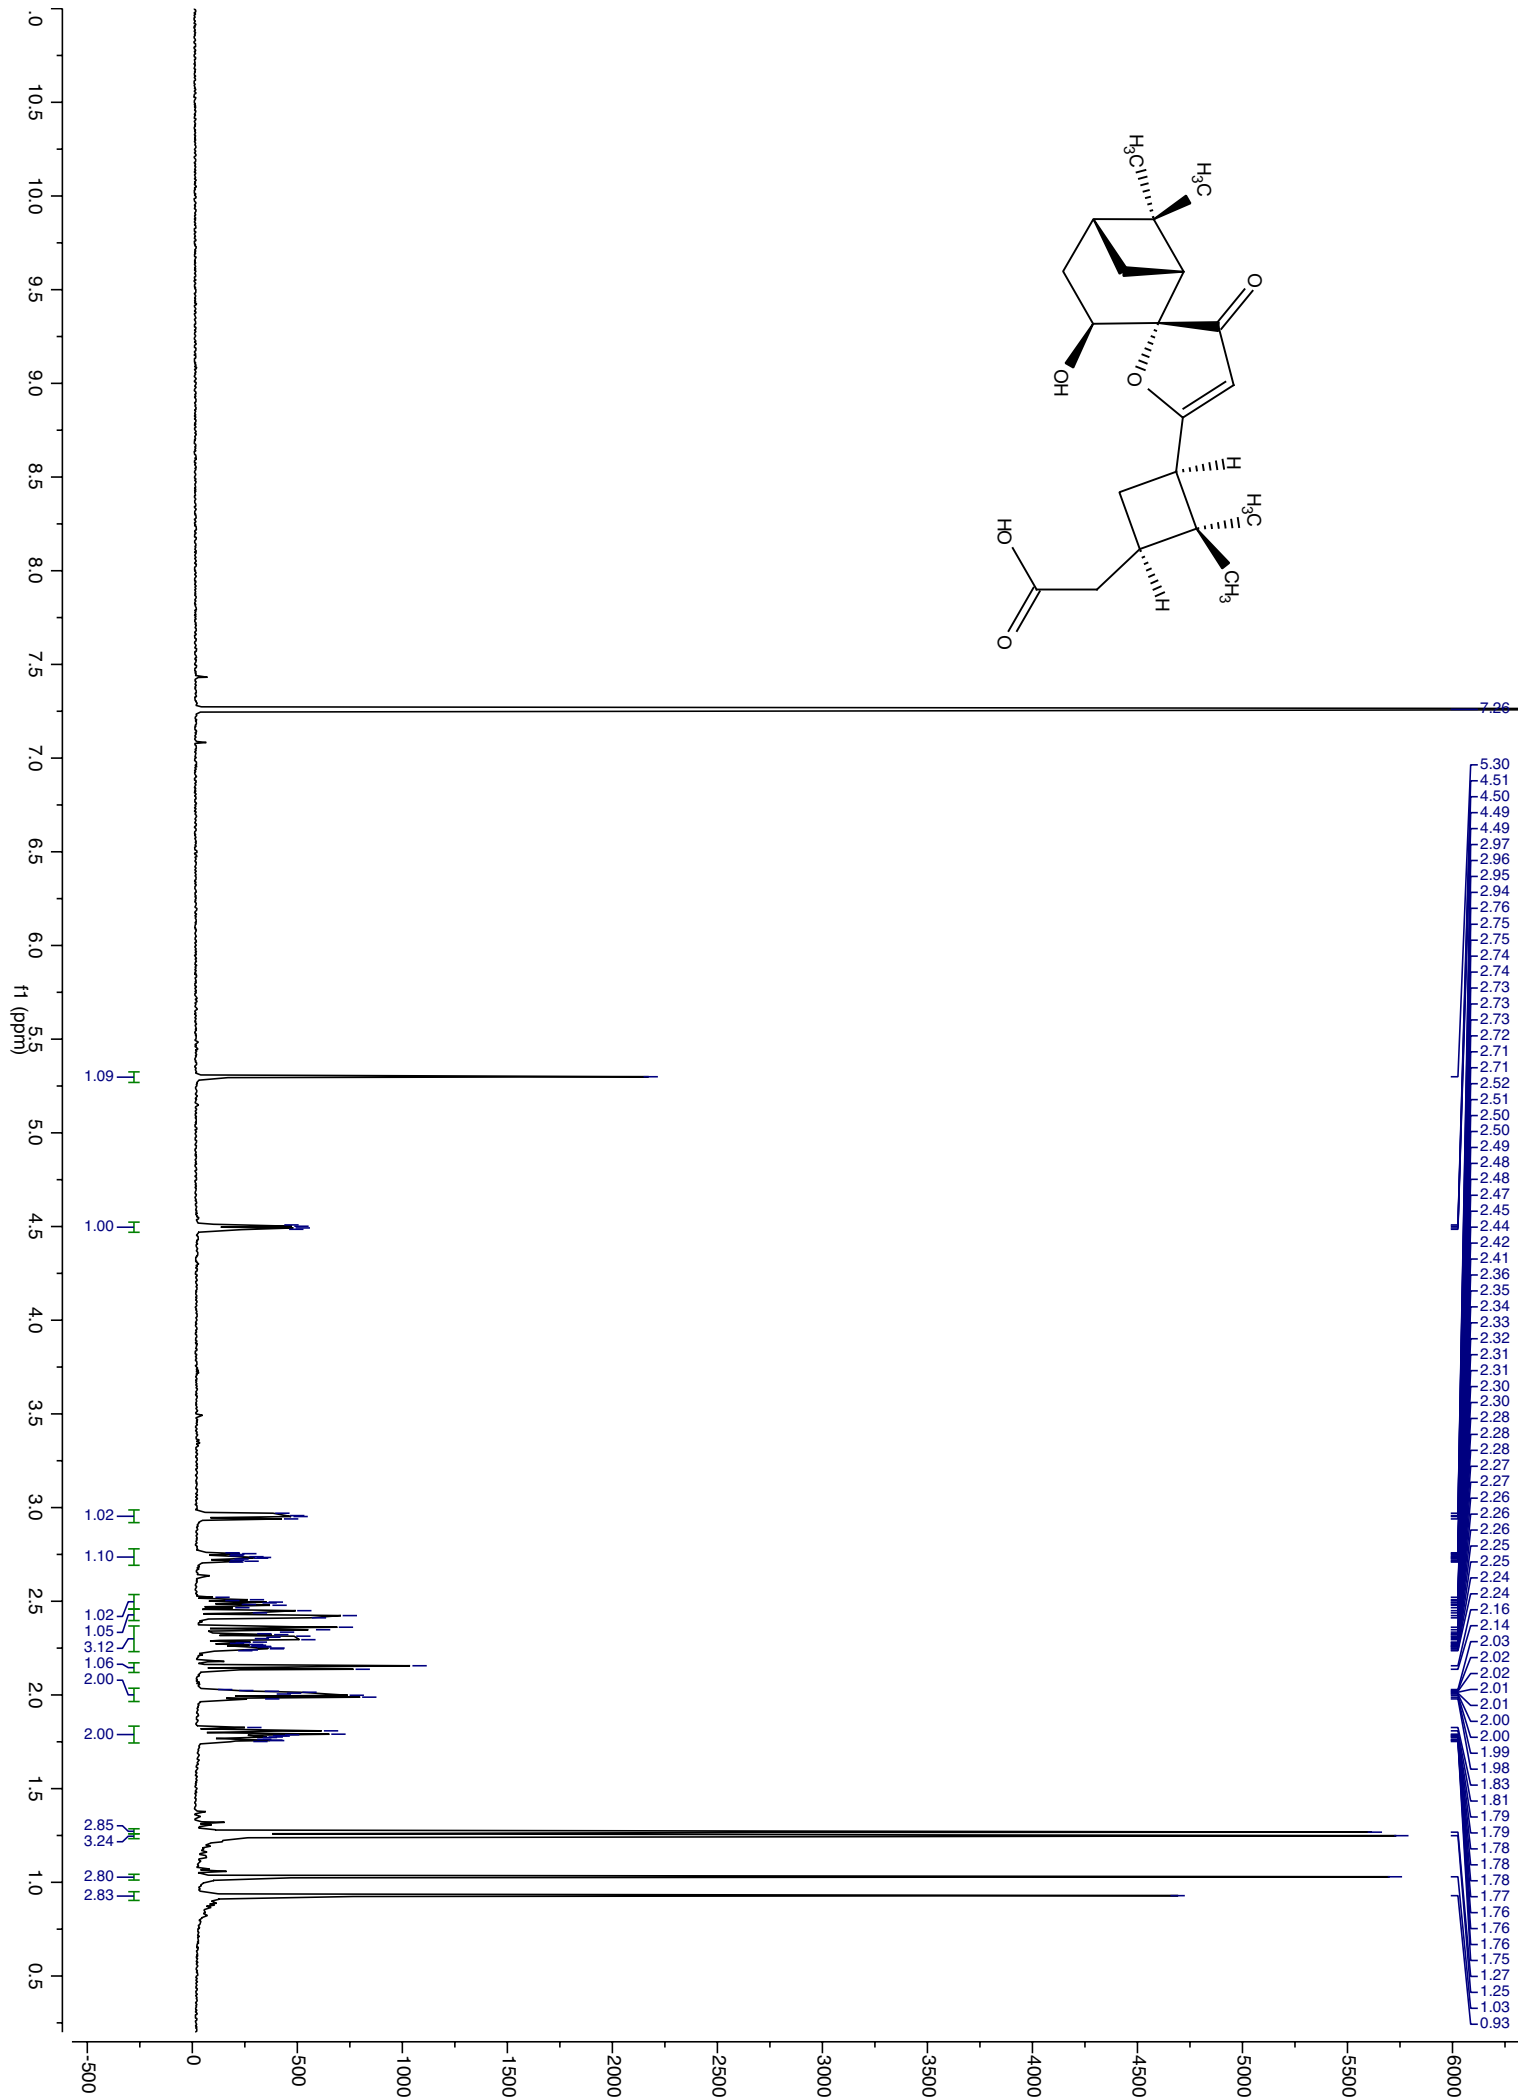

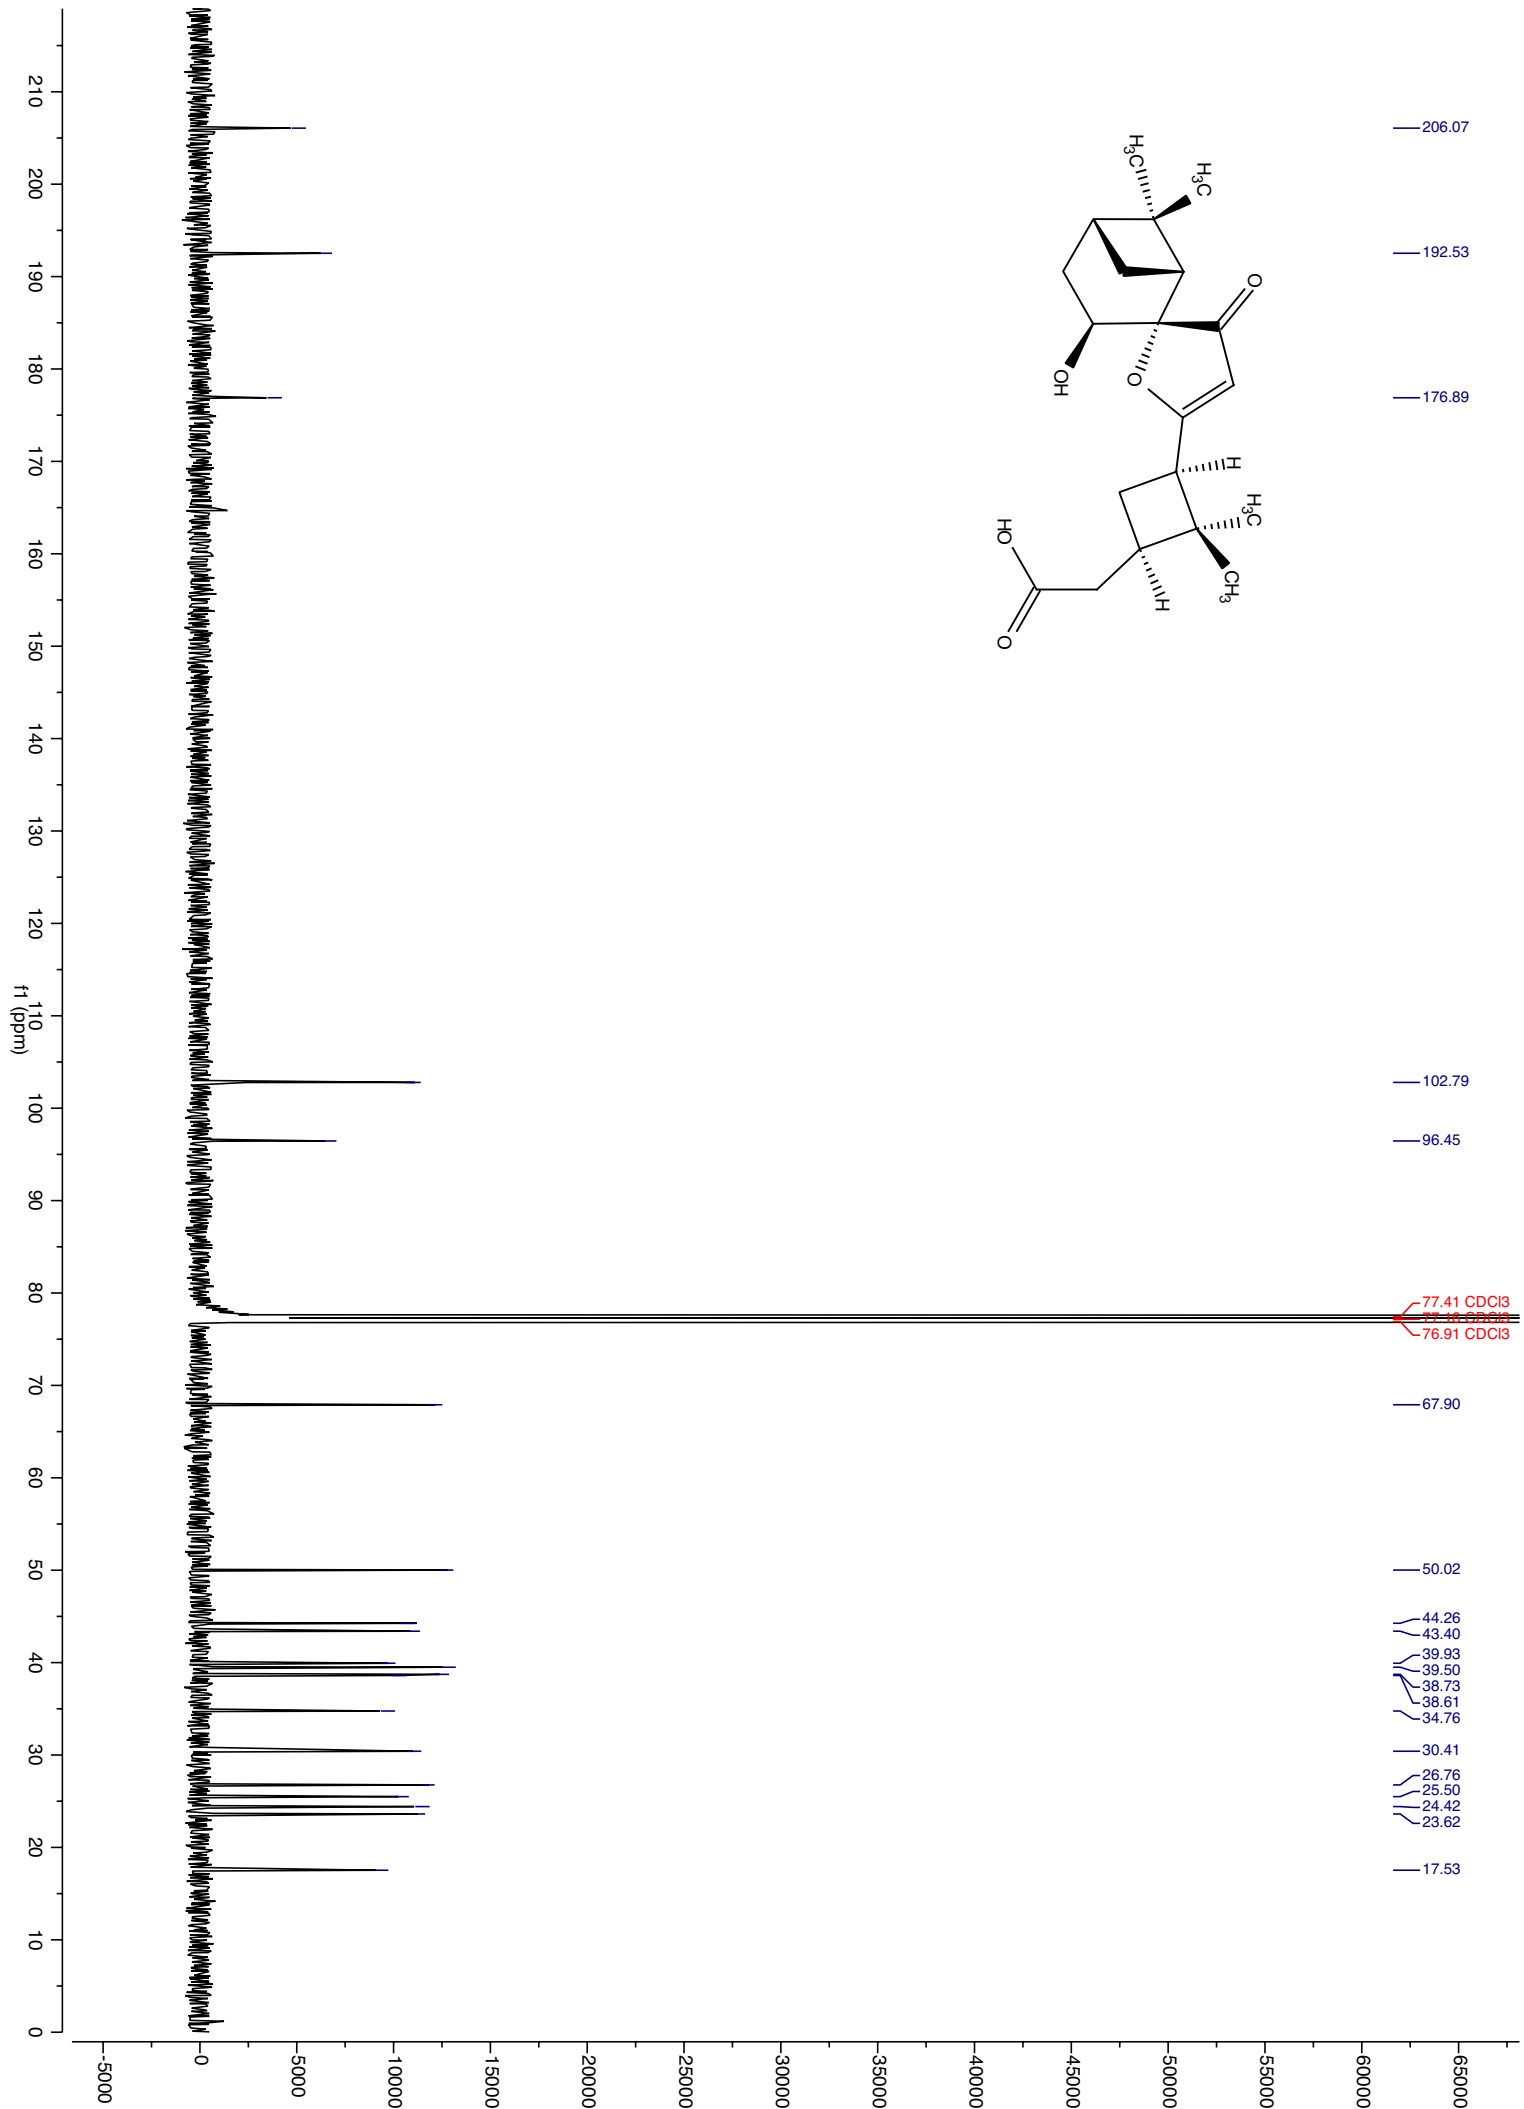



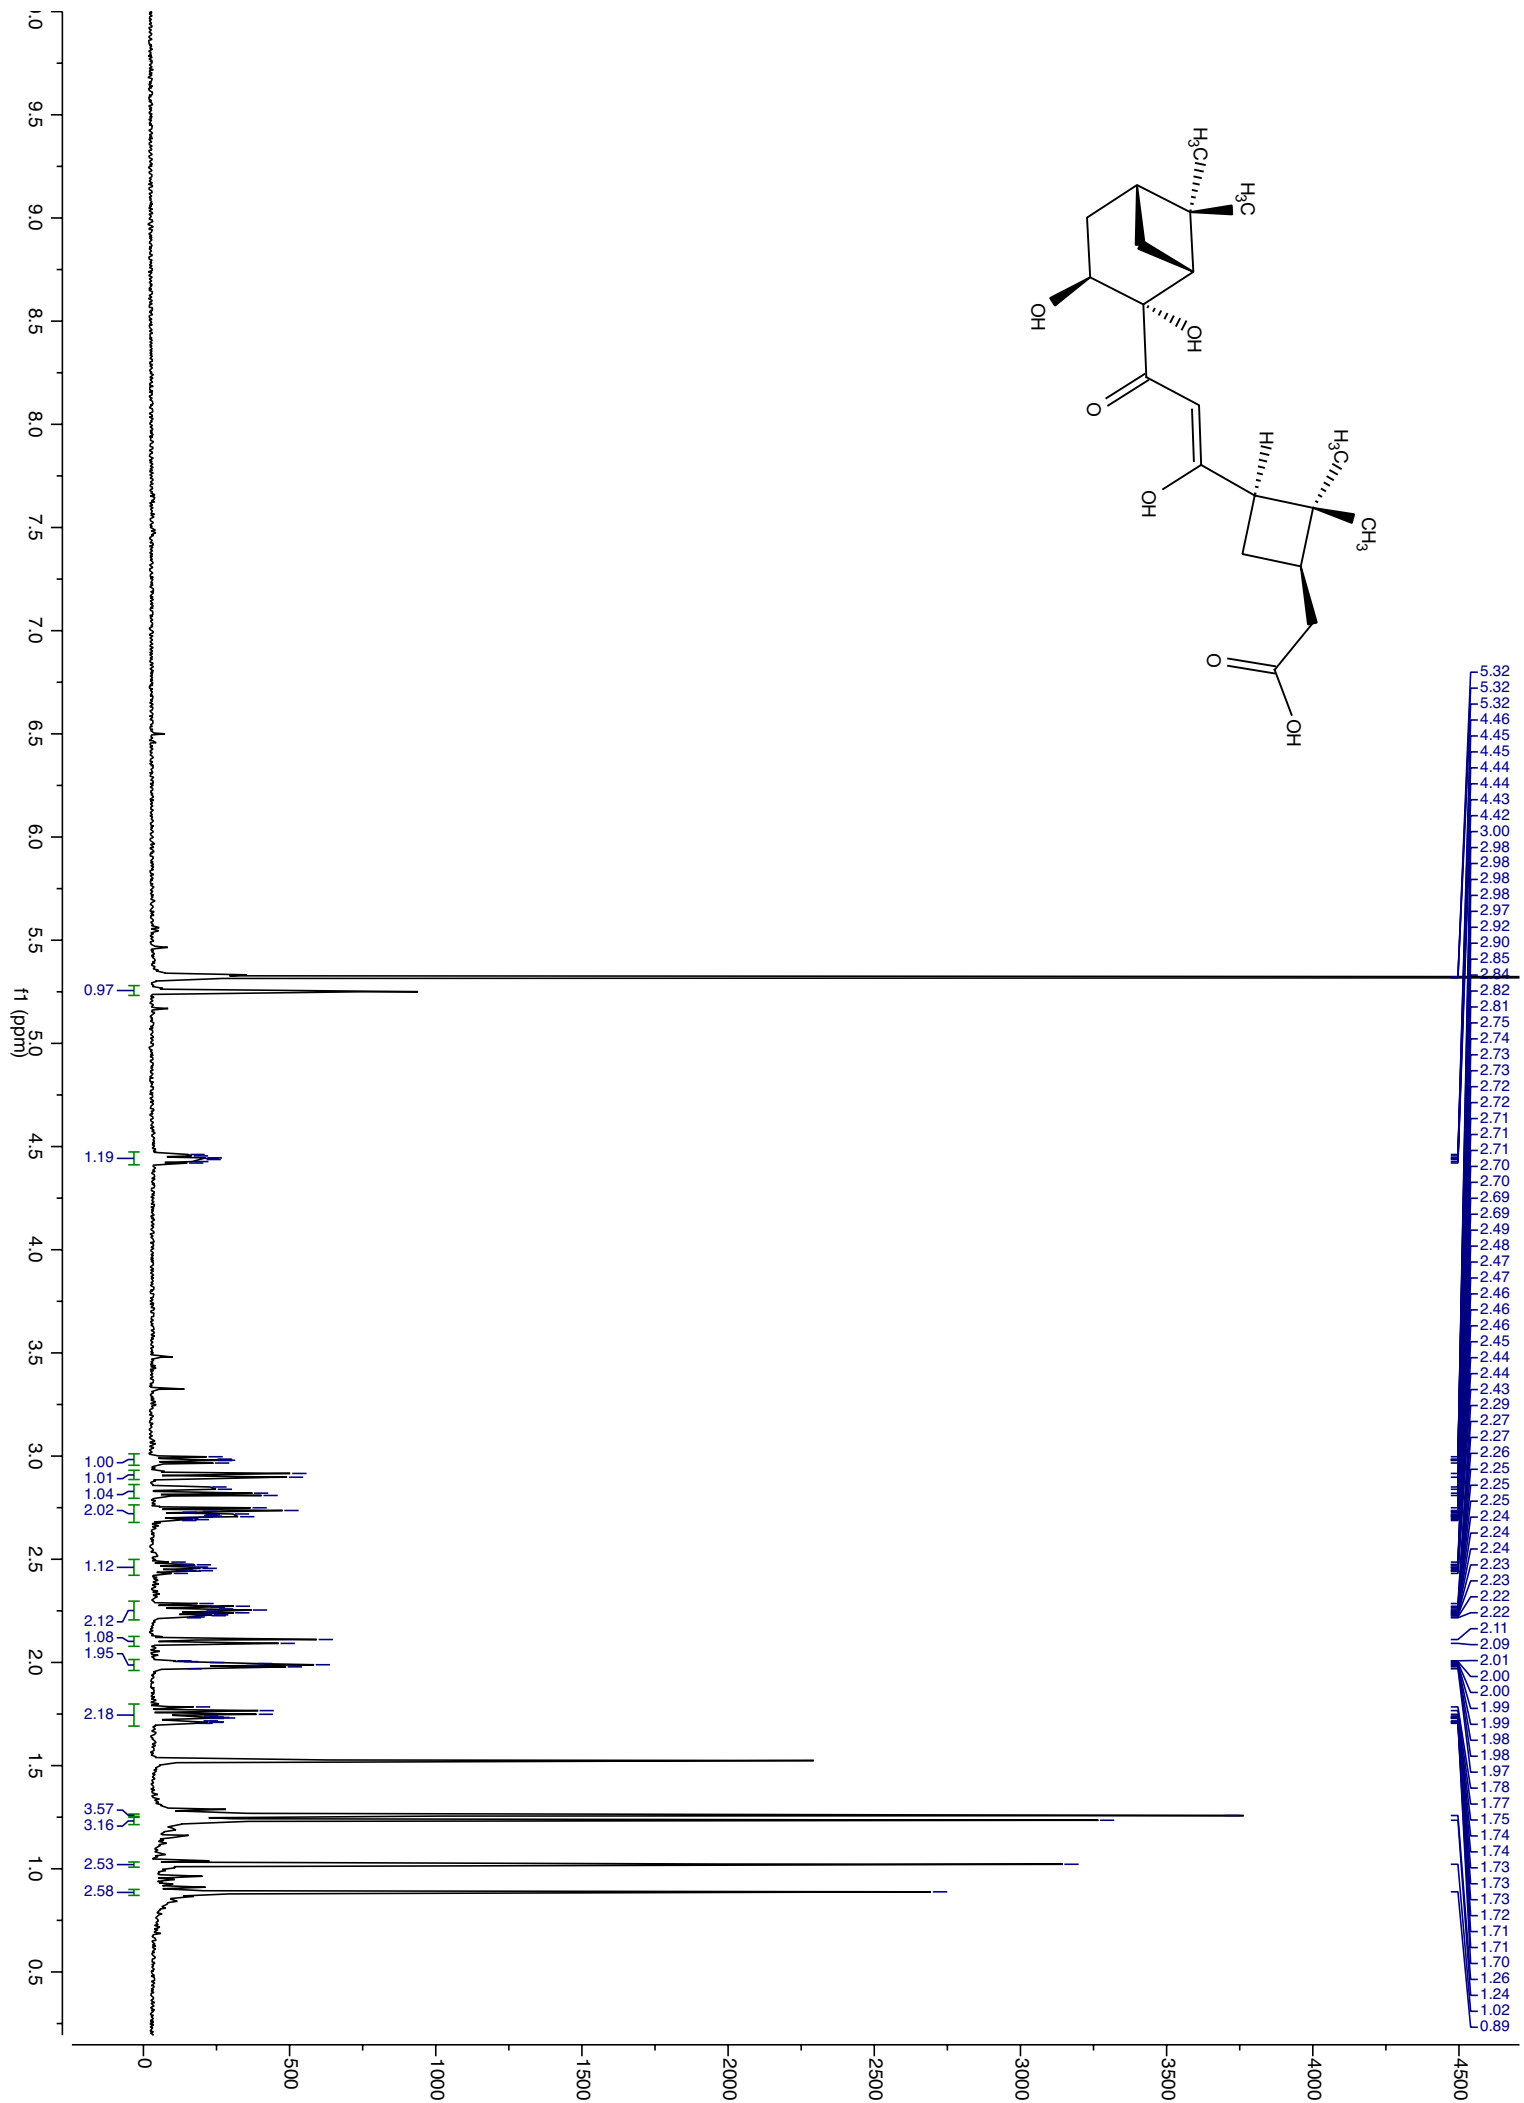

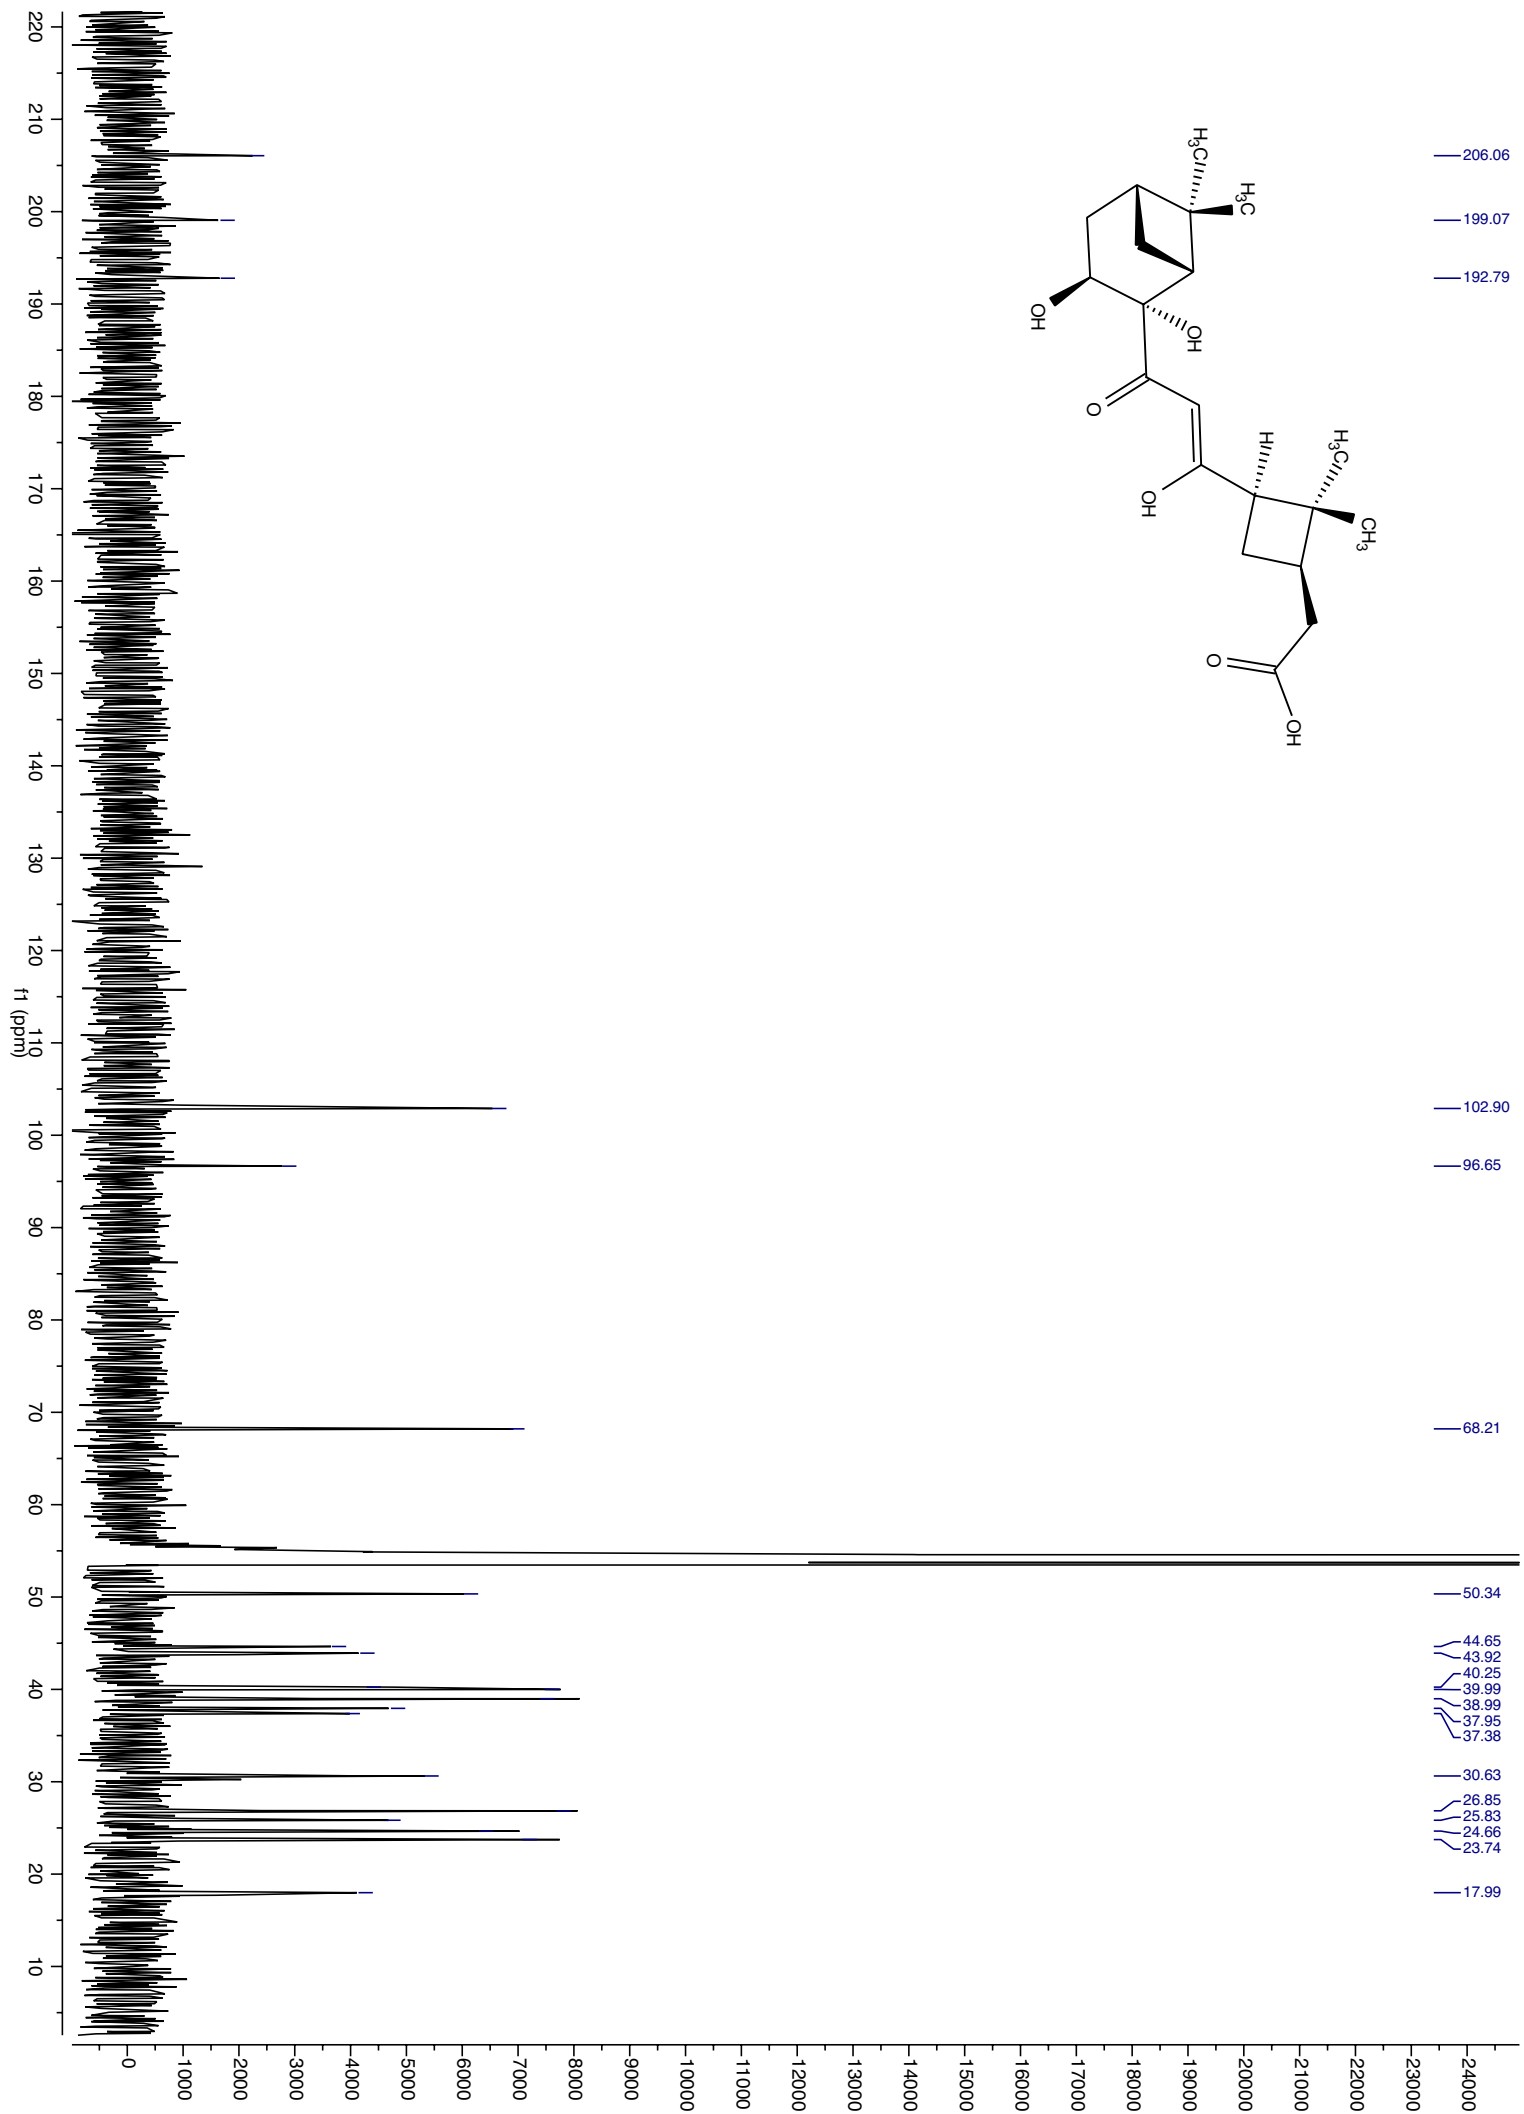

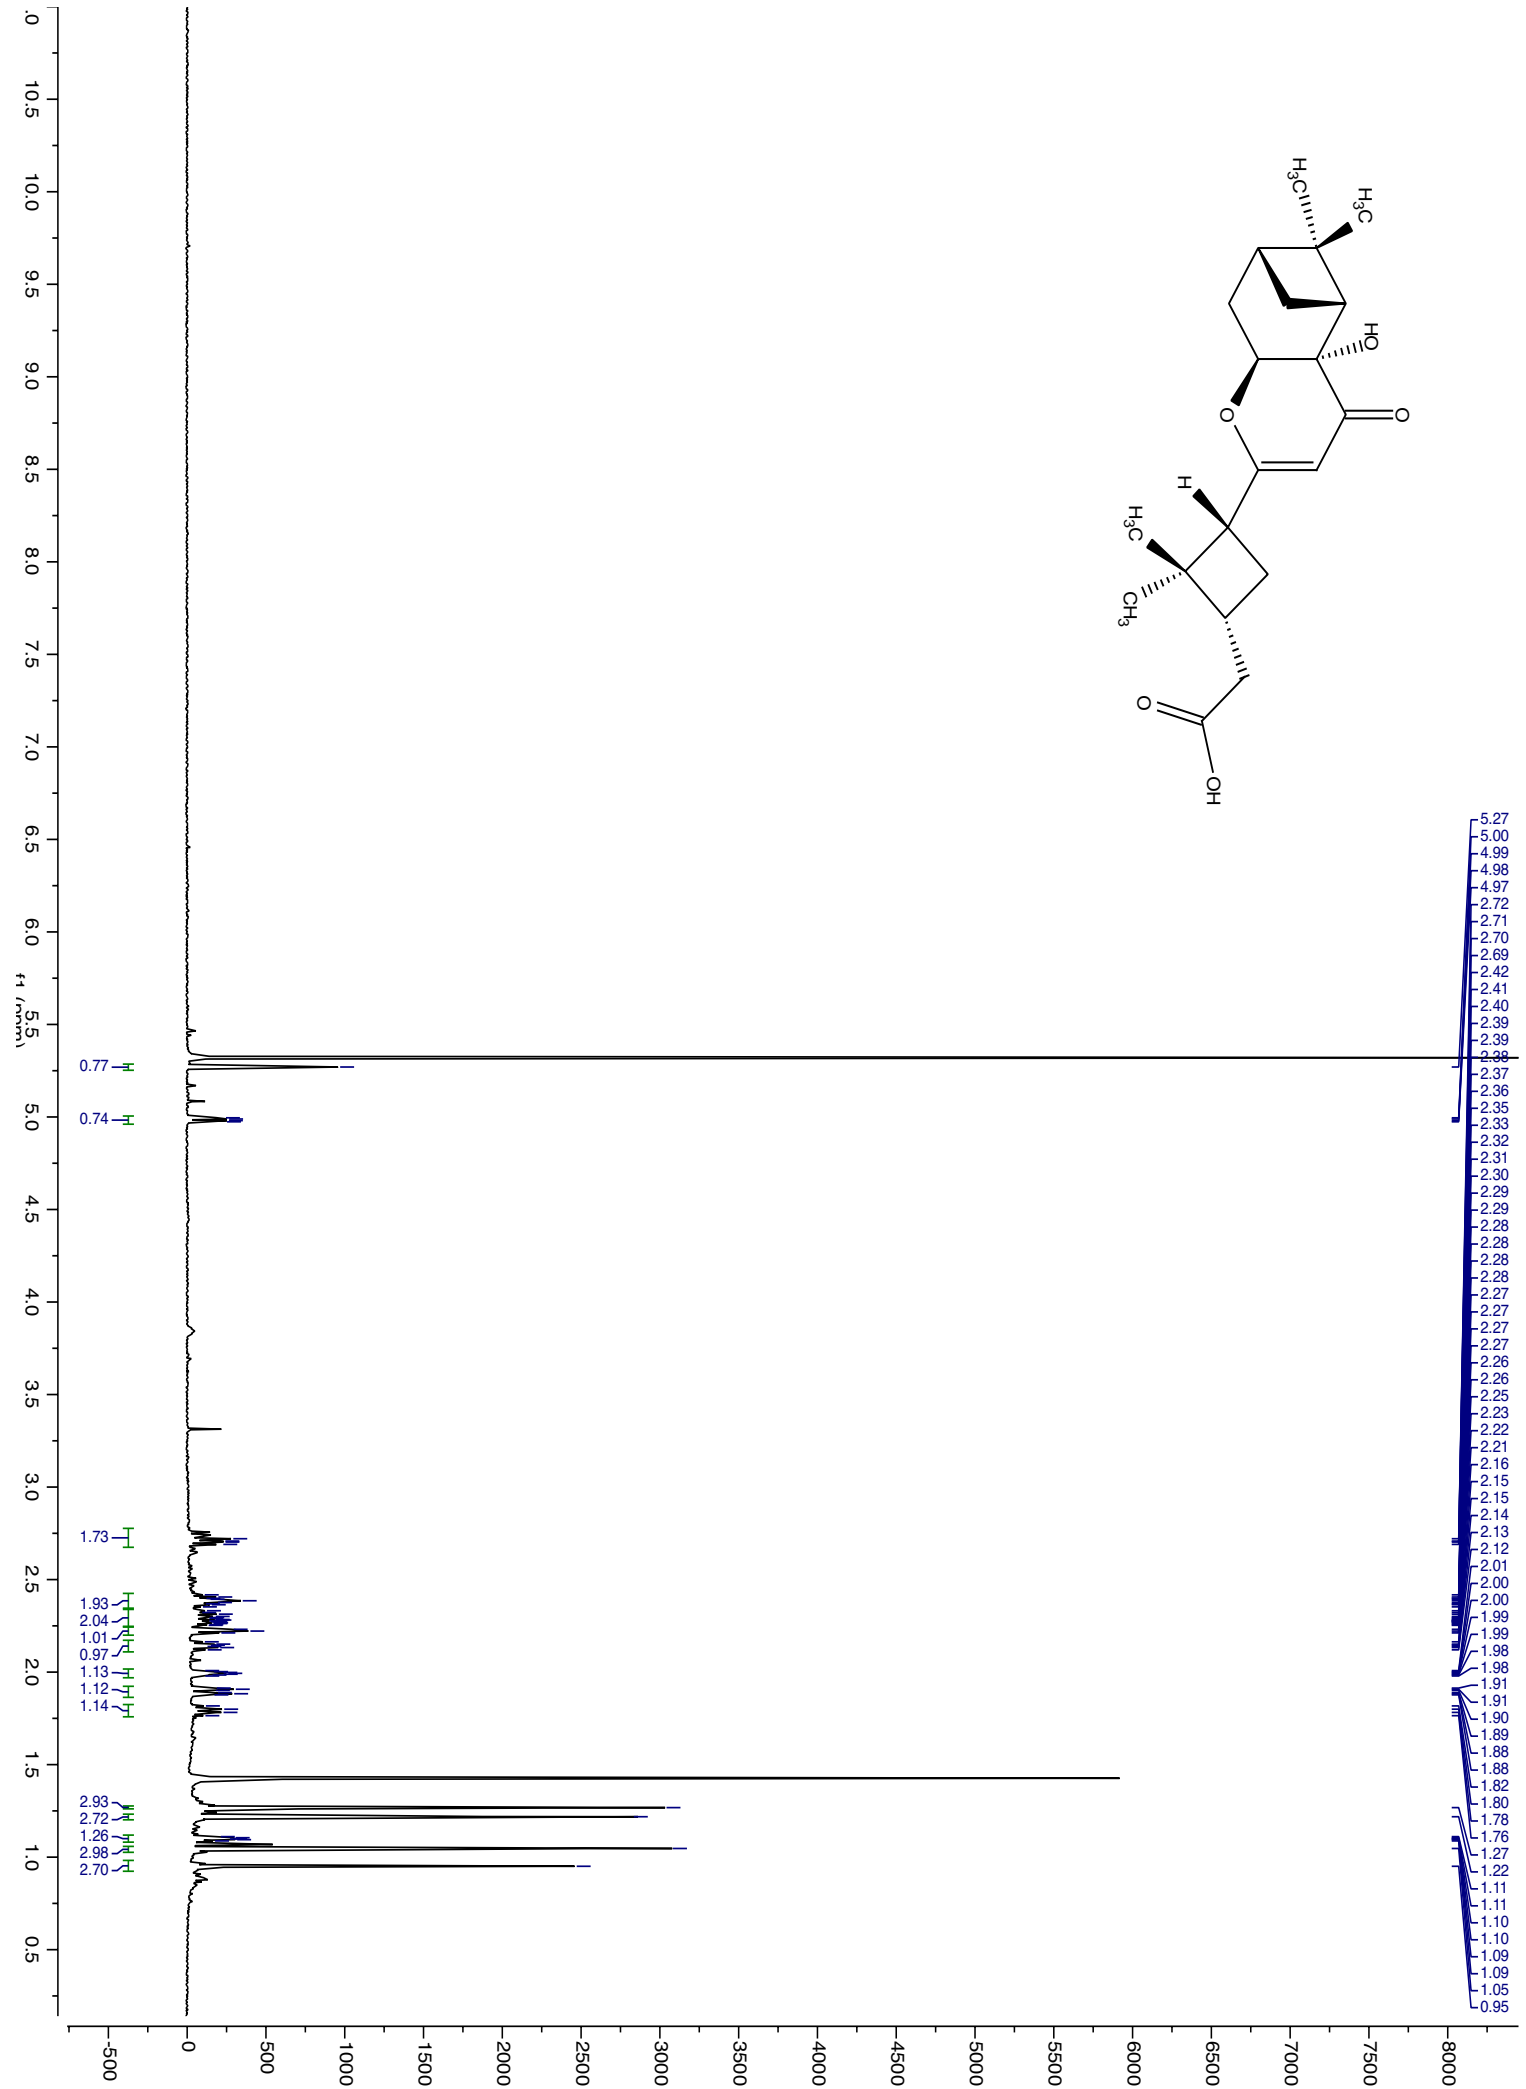

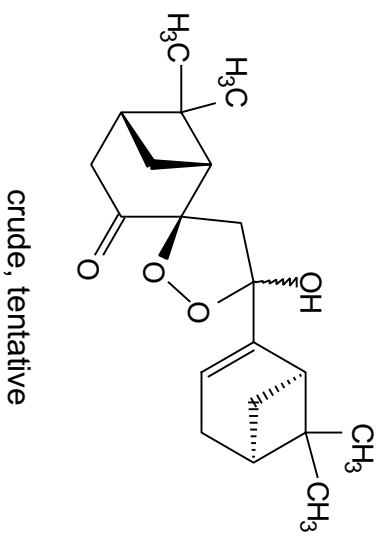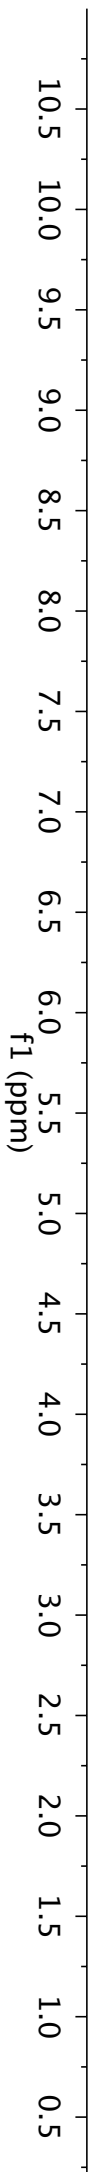

LFT2512 #1-67 RT: 0.01-0.99 AV: 67 NL: 2.50E6  
T: FTMS + p ESI Full ms [200.00-1400.00]

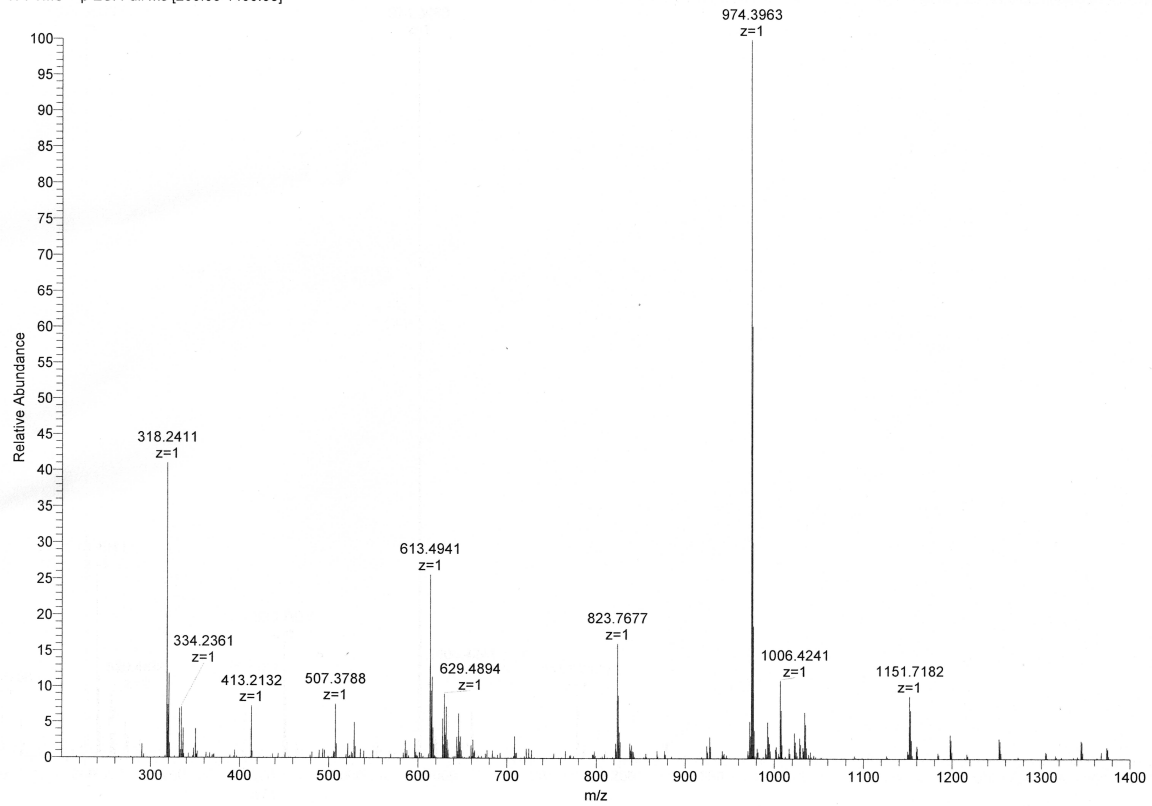

LFT2512 #1-67 RT: 0.01-0.99 AV: 67 NL: 2.50E6  
T: FTMS + p ESI Full ms [200.00-1400.00]

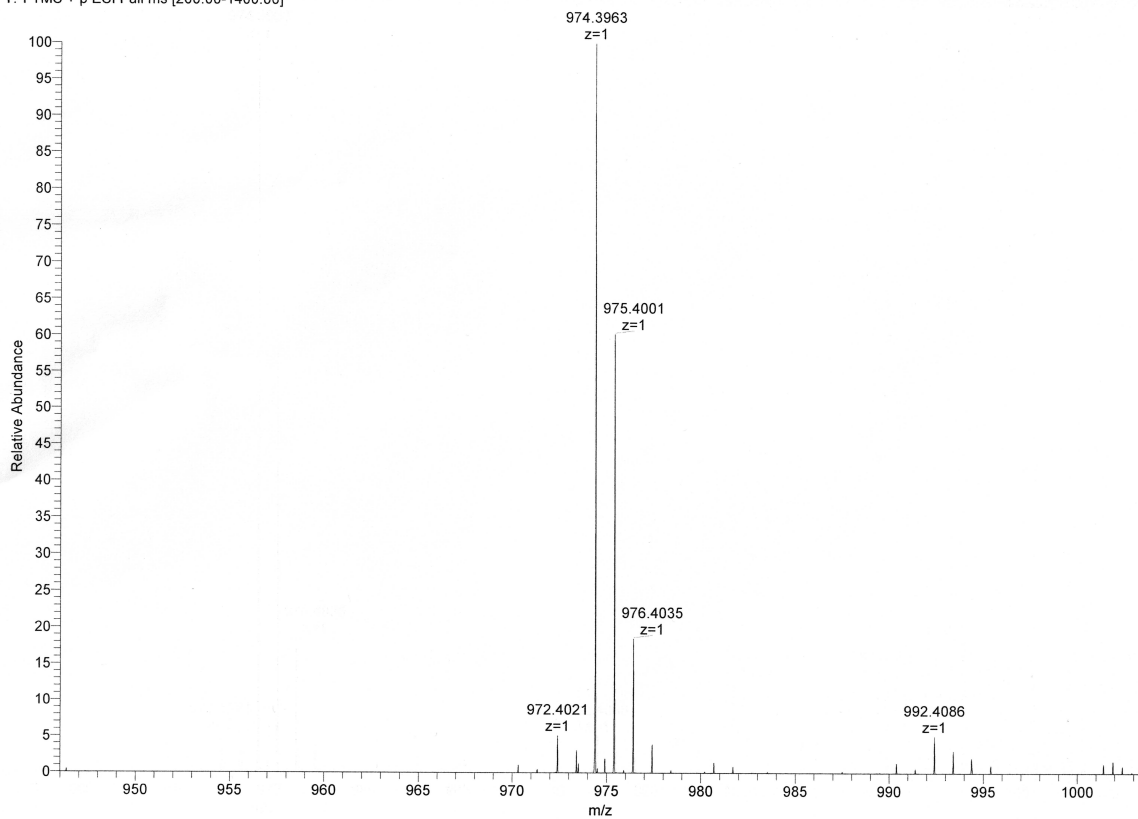

Supplement: NIHMS956896-supplement-supporting_information.pdf [file NIHMS956896-supplement-supporting_information.pdf]
